# Supplementary material for: Evolution of Yin and Yang isoforms of a chromatin remodeling subunit results in the creation of two genes
Source: bioRxiv preprint, doi:10.1101/616995, version 1 (2019-04-24)
Supplement: Supplemental Table 1 [file 616995_file07.xlsx]

## Sheet: Sheet1
Id	common name	sequence name	NARLi52hrs	wt52hrs	NARLi60hrs	wt60hrs	WTctrl	FDELctrl	WT2hrHS	FDEL2hrHS	WT4hrHS	FDEL4hrHS	WT2hrHSr	FDEL2hrHSr	CX12311	ARL_deletion	LSJ2	NIL
WBGene00000001	aap-1	Y110A7A.10	384	398	741	803	241	246	302	287	332	314	364	342	982	994	1071	1128
WBGene00000002	aat-1	F27C8.1	132	72	57	64	332	322	165	145	111	102	138	139	148	156	139	118
WBGene00000003	aat-2	F07C3.7	292	203	115	102	218	186	106	100	87	91	128	119	238	179	176	139
WBGene00000004	aat-3	F52H2.2	96	93	145	134	187	190	64	64	40	40	71	78	377	439	373	374
WBGene00000005	aat-4	T13A10.10	125	107	205	174	217	218	163	161	123	135	116	123	309	190	260	223
WBGene00000006	aat-5	C55C2.5	166	196	94	95	191	196	168	173	159	156	189	161	90	161	112	80
WBGene00000007	aat-6	T11F9.4	361	347	187	153	343	337	47	61	58	62	54	48	311	231	248	202
WBGene00000009	aat-8	F28F9.4	34	8	7	7	33	26	13	12	9	7	10	11	32	15	18	13
WBGene00000010	aat-9	Y53H1C.1	291	264	394	409	329	301	312	277	317	293	343	350	889	894	929	972
WBGene00000016	abf-5	T22H6.5	8	28	31	24	47	53	57	55	87	78	56	75	59	98	79	55
WBGene00000017	abf-6	T22H6.7	22	79	60	71	100	101	46	47	60	58	59	60	93	132	100	80
WBGene00000018	abl-1	M79.1	313	251	217	216	348	392	234	223	230	206	205	218	795	722	659	685
WBGene00000019	abt-1	C24F3.5	406	366	87	75	58	74	52	70	50	48	59	74	24	31	40	33
WBGene00000020	abt-2	F12B6.1	497	449	240	211	440	406	215	228	277	256	432	483	577	533	405	431
WBGene00000022	abt-4	Y39D8C.1	1322	1318	384	393	760	854	424	398	479	439	614	610	1179	978	785	854
WBGene00000023	abt-5	Y53C10A.9	495	404	54	53	77	106	87	120	64	70	86	90	24	22	23	19
WBGene00000031	abu-8	C03A7.14	1626	960	2	1	7	61	25	30	25	78	5	46	5	48	7	13
WBGene00000033	abu-10	F35A5.3	1028	703	2	1	5	31	15	22	9	48	5	27	5	19	9	5
WBGene00000034	abu-11	T01D1.6	1692	908	3	4	12	55	39	52	38	104	17	56	5	25	6	11
WBGene00000035	ace-1	W09B12.1	134	109	69	77	79	74	55	56	46	44	55	48	185	188	175	143
WBGene00000036	ace-2	Y44E3A.2	252	264	150	145	256	245	105	105	91	83	137	130	302	300	234	242
WBGene00000037	ace-3	Y48B6A.8	36	32	15	16	35	35	7	7	8	7	11	18	61	187	102	83
WBGene00000038	ace-4	Y48B6A.7	11	15	12	12	17	14	8	8	9	13	11	10	12	20	10	9
WBGene00000039	acn-1	C42D8.5	639	151	44	53	4380	4273	3732	3110	2939	2329	4247	3807	180	769	249	241
WBGene00000040	aco-1	ZK455.1	2288	2600	2776	2725	5276	4945	4657	4180	5048	4493	4960	4475	1630	1536	1703	1706
WBGene00000041	aco-2	F54H12.1	8548	9079	8756	8844	10009	9913	11475	10786	12266	11321	11365	10665	2141	2305	2309	2562
WBGene00000042	acr-2	K11G12.2	28	18	11	7	24	32	16	17	15	14	23	24	17	42	22	14
WBGene00000043	acr-3	K11G12.7	7	11	3	8	18	13	27	25	15	23	16	15	12	13	13	8
WBGene00000046	acr-7	T09A5.3	13	11	7	7	13	19	11	10	17	18	19	16	19	19	13	13
WBGene00000047	acr-8	ZC504.2	80	65	35	35	110	110	47	48	44	50	44	46	60	121	62	46
WBGene00000048	acr-9	C40C9.2	9	11	5	4	17	15	6	7	2	6	5	5	20	38	33	28
WBGene00000050	acr-11	D2092.3	18	15	14	14	25	22	20	20	16	16	20	17	56	44	43	39
WBGene00000051	acr-12	R01E6.4	50	44	18	15	26	31	7	6	6	8	11	13	43	85	38	47
WBGene00000054	acr-15	F25G6.4	59	64	49	41	61	69	13	11	8	4	13	10	82	62	59	55
WBGene00000055	acr-16	F25G6.3	79	65	55	52	77	89	29	25	23	20	32	30	102	105	84	61
WBGene00000056	acr-17	F53E10.2	12	12	10	12	6	6	33	33	45	107	27	81	34	33	30	17
WBGene00000057	acr-18	F28F8.1	43	44	46	37	16	20	16	19	13	20	12	13	63	30	45	40
WBGene00000058	acr-19	C31H5.3	11	9	7	11	13	12	5	4	8	5	10	7	20	41	26	23
WBGene00000059	acr-20	R06A4.10	12	12	12	8	21	12	6	5	8	7	18	17	15	32	23	15
WBGene00000060	acr-21	F27B3.2	12	8	7	4	16	12	4	5	6	6	9	3	9	20	16	11
WBGene00000063	act-1	T04C12.6	5044	5217	3456	3297	5727	5385	8191	8244	9304	8860	8221	7701	172	180	185	192
WBGene00000064	act-2	T04C12.5	7854	8850	9401	9406	5233	5275	6018	5833	5982	5598	5892	6057	889	983	981	1097
WBGene00000065	act-3	T04C12.4	5010	5097	3281	3240	5854	5404	8202	7801	8747	9018	7736	7289	284	300	303	335
WBGene00000066	act-4	M03F4.2	18185	19041	9768	9799	22416	21018	32811	29697	35598	32176	30596	29029	1195	1291	1286	1378
WBGene00000067	act-5	T25C8.2	11024	11724	4772	4860	11288	10199	3658	3389	1944	2006	3061	2938	957	976	973	1076
WBGene00000068	acy-1	F17C8.1	272	255	139	131	231	252	109	110	116	109	130	130	278	431	286	252
WBGene00000069	acy-2	C10F3.3	26	20	13	16	35	36	14	10	15	12	20	15	36	76	48	34
WBGene00000070	acy-3	C44F1.5	161	142	97	118	409	443	258	220	169	174	279	272	266	382	254	246
WBGene00000071	acy-4	T01C2.1	223	194	117	136	109	103	68	69	72	71	78	61	390	280	321	290
WBGene00000072	add-1	F39C12.2	234	180	129	126	133	150	139	141	137	151	115	118	281	270	240	240
WBGene00000073	add-2	F57F5.4	145	180	240	252	213	200	244	220	232	192	234	208	562	481	556	508
WBGene00000074	adm-2	C04A11.4	231	174	241	261	296	305	187	163	158	180	304	455	787	676	667	694
WBGene00000075	adm-4	ZK154.7	131	113	236	238	178	181	69	61	50	52	98	96	731	570	623	659
WBGene00000079	adr-1	H15N14.1	787	825	789	803	860	849	822	787	1000	898	1023	962	1051	1003	996	1039
WBGene00000080	adr-2	T20H4.4	521	629	944	993	432	430	381	364	375	372	397	335	924	926	985	1006
WBGene00000081	ads-1	Y50D7A.7	3587	3614	2243	2128	3534	3406	2870	2839	2901	2876	2853	2707	1093	1024	1105	1133
WBGene00000082	adt-1	C02B4.1	802	168	19	19	79	179	173	173	145	187	107	158	59	137	50	48
WBGene00000083	adt-2	F08C6.1	662	771	684	688	1340	1227	1118	972	1096	971	1294	1217	1020	971	834	861
WBGene00000084	aex-1	D2030.10	183	208	120	113	122	121	87	91	105	124	113	110	429	305	338	270
WBGene00000085	aex-2	T14B1.2	14	15	9	13	12	9	9	7	9	10	17	16	39	36	33	25
WBGene00000086	aex-3	C02H7.3	220	212	94	105	205	214	104	100	113	98	139	121	285	357	255	231
WBGene00000088	aex-5	F32A7.6	274	300	202	184	381	380	269	269	266	264	254	243	329	291	291	261
WBGene00000089	aex-6	Y87G2A.4	95	74	54	47	96	98	47	34	27	30	41	40	99	139	99	93
WBGene00000090	age-1	B0334.8	424	462	772	843	394	361	493	523	591	588	531	511	1872	1784	1937	1988
WBGene00000092	ags-3	F32A6.4	324	245	342	321	234	216	145	166	152	155	209	263	614	495	541	519
WBGene00000093	agt-1	Y62E10A.5	177	180	259	259	136	131	122	121	96	121	97	95	265	256	271	286
WBGene00000094	agt-2	F09E5.13	86	112	240	259	65	74	90	86	95	104	109	84	432	408	455	456
WBGene00000095	aha-1	C25A1.11	136	109	171	179	199	192	255	227	248	213	275	211	433	414	395	389
WBGene00000097	aip-1	F58E10.4	212	202	325	335	141	162	2131	2080	2587	2512	2177	2382	420	399	420	429
WBGene00000098	air-1	K07C11.2	1250	1329	2428	2382	736	745	625	636	515	600	617	601	1005	1081	1100	1202
WBGene00000099	air-2	B0207.4	349	399	780	776	180	189	138	151	139	144	126	150	647	676	715	743
WBGene00000100	ajm-1	C25A11.4	3097	2619	992	1074	2750	2797	2835	2659	2812	2668	2391	2528	1641	1724	1464	1465
WBGene00000101	aka-1	D1022.7	1608	1858	2784	2911	1049	1077	1043	1044	1355	1168	1299	975	2859	2997	3112	3321
WBGene00000102	akt-1	C12D8.10	1091	1021	1877	1933	965	1023	803	797	801	759	820	889	1461	1527	1619	1695
WBGene00000103	akt-2	F28H6.1	141	165	122	132	217	218	257	240	244	275	277	370	243	241	238	189
WBGene00000105	alg-1	F48F7.1	986	717	573	558	2029	2056	1360	1225	1635	1395	1684	1389	1453	1624	1305	1382
WBGene00000106	alg-2	T07D3.7	452	473	632	676	564	551	274	233	209	208	260	215	1233	1088	1023	1158
WBGene00000107	alh-1	F54D8.3	3223	3615	3506	3419	4284	4090	5116	4873	5755	5346	5096	4791	1152	1201	1272	1363
WBGene00000109	alh-3	F36H1.6	1118	1161	1169	1243	2456	2404	2848	2594	2925	2582	2728	2581	1460	1455	1463	1465
WBGene00000110	alh-4	T05H4.13	2188	3170	1192	1217	1326	1269	1343	1272	1331	1304	1315	1301	1179	1125	1215	1254
WBGene00000111	alh-5	T08B1.3	121	90	56	46	206	215	132	128	102	136	105	105	135	137	196	110
WBGene00000112	alh-6	F56D12.1	1317	1921	1800	1687	1493	1357	1721	1690	2257	2198	1703	1673	823	796	817	821
WBGene00000113	alh-7	F45H10.1	363	343	259	240	578	500	559	484	626	641	477	516	531	471	541	528
WBGene00000114	alh-8	F13D12.4	9838	12260	9863	10154	12738	12071	17403	16067	20420	19416	16733	15774	1386	1289	1525	1679
WBGene00000115	alh-9	F01F1.6	1160	2438	3442	3392	3133	2769	3716	3351	4553	3314	4641	3558	1202	1159	1189	1309
WBGene00000116	alh-10	C54D1.4	321	305	400	380	326	301	348	359	383	421	393	377	523	387	397	389
WBGene00000117	alh-11	F42G9.5	521	536	521	525	627	657	637	619	670	630	696	618	782	738	755	768
WBGene00000118	alh-12	Y69F12A.2	1670	1235	1147	1053	1747	1706	1745	1726	2114	2008	1718	1645	693	660	762	701
WBGene00000120	aly-1	C01F6.5	130	101	118	126	246	229	313	303	379	382	290	311	218	241	208	198
WBGene00000121	aly-2	F23B2.6	1144	1259	2320	2480	770	736	800	788	725	750	755	782	610	654	677	718
WBGene00000122	aly-3	M18.7	1605	1688	2294	2370	1354	1308	1560	1511	1670	1662	1578	1537	842	881	889	931
WBGene00000123	ama-1	F36A4.7	1762	1748	1363	1607	2234	1985	2145	1879	2577	2440	2274	2186	3248	3099	3110	3471
WBGene00000133	amt-1	C05E11.4	69	98	133	101	13	11	9	6	4	10	12	5	127	23	190	144
WBGene00000135	amt-3	M195.3	28	24	16	16	27	26	8	9	9	8	14	12	40	85	52	44
WBGene00000136	amt-4	C05E11.5	310	347	498	519	1038	1004	381	398	285	287	287	271	629	471	571	545
WBGene00000137	amx-1	R13G10.2	71	65	159	180	126	111	65	60	56	61	80	74	597	499	536	496
WBGene00000138	amx-2	B0019.1	960	781	165	172	110	127	127	96	137	142	120	152	304	221	186	203
WBGene00000139	amx-3	F25C8.2	118	94	91	83	112	110	101	101	74	76	73	70	194	150	153	133
WBGene00000140	anc-1	ZK973.6	914	991	500	546	976	866	1148	1101	1619	1644	1192	1118	1358	1102	855	1062
WBGene00000142	aos-1	C08B6.9	866	965	1607	1632	832	774	915	951	1099	1057	957	952	807	836	885	934
WBGene00000143	apc-2	K06H7.6	470	572	975	943	306	320	239	268	295	298	316	309	1205	1160	1244	1213
WBGene00000144	apc-10	F15H10.3	190	224	377	379	96	85	78	80	67	83	82	87	321	318	342	341
WBGene00000145	apc-11	F35G12.9	201	209	414	464	113	120	110	117	107	122	108	93	277	277	305	314
WBGene00000146	ape-1	F46F3.4	931	980	1543	1636	698	638	1334	1283	1531	1498	971	1105	1760	1875	1922	2059
WBGene00000147	aph-1	VF36H2L.1	178	193	396	382	113	112	92	88	85	106	98	101	519	523	588	570
WBGene00000148	aph-2	ZC434.6	435	462	750	781	376	386	257	265	245	247	297	264	1088	1104	1184	1173
WBGene00000149	apl-1	C42D8.8	4134	3649	1823	1807	4647	4611	4153	3862	3875	3630	4106	4058	1364	1542	1401	1438
WBGene00000150	apm-1	F55A12.7	766	645	298	320	939	891	957	910	912	790	985	1028	428	423	378	361
WBGene00000151	apn-1	T05H10.2	459	527	861	873	309	334	328	359	381	400	348	339	739	757	810	842
WBGene00000155	app-1	W03G9.4	1646	1616	2752	2730	1867	1818	1546	1500	1396	1311	1404	1422	1468	1541	1617	1698
WBGene00000156	apr-1	K04G2.8	421	494	1034	1095	393	395	413	436	425	428	382	324	2168	2187	2368	2416
WBGene00000157	aps-2	F02E8.3	129	116	194	205	260	250	292	287	172	179	261	265	219	223	220	217
WBGene00000158	apg-1	Y105E8A.9	1043	921	917	944	1349	1310	1035	933	863	755	937	938	1456	1478	1513	1570
WBGene00000159	aps-1	F29G9.3	427	363	612	565	394	408	415	413	311	311	368	368	363	376	385	402
WBGene00000160	apb-1	Y71H2B.10	1184	1048	1233	1307	1801	1784	1685	1520	1723	1518	1634	1612	1558	1646	1680	1783
WBGene00000161	apa-2	T20B5.1	505	450	608	611	1166	1164	924	759	665	580	885	849	1219	1148	1106	1156
WBGene00000162	apd-3	W09G10.4	475	467	724	808	682	625	734	635	815	798	616	588	1643	1652	1676	1712
WBGene00000163	apb-3	R11A5.1	707	624	1078	1138	699	674	674	666	725	743	625	640	1639	1670	1810	1849
WBGene00000164	apm-3	F53H8.1	135	107	190	200	216	222	97	103	79	75	130	110	416	383	370	379
WBGene00000165	aps-3	Y48G8AL.14	443	436	743	768	458	432	482	542	531	517	456	453	575	511	562	533
WBGene00000166	apt-9	W04G3.4	26	22	16	13	29	32	9	10	14	10	14	10	37	65	43	31
WBGene00000168	apx-1	K08D9.3	291	349	735	794	128	116	152	162	165	182	154	165	1147	1163	1241	1330
WBGene00000169	aqp-1	F32A5.5	630	823	541	538	478	465	335	345	343	382	301	287	351	307	355	309
WBGene00000170	aqp-2	C01G6.1	648	628	388	365	1070	1076	1273	1174	1301	1234	1349	1292	388	752	521	552
WBGene00000172	aqp-4	F40F9.9	619	470	182	173	384	407	210	201	213	202	171	194	247	266	207	190
WBGene00000174	aqp-6	C32C4.2	7	10	14	9	10	15	18	16	23	22	20	25	23	20	26	18
WBGene00000175	aqp-7	M02F4.8	1667	2265	2123	2082	2036	1852	2043	1906	1967	1998	2113	1926	652	569	652	678
WBGene00000176	aqp-8	K02G10.7	302	951	507	526	311	313	410	390	578	616	470	464	471	378	324	365
WBGene00000177	aqp-9	K07A1.16	62	71	87	82	140	125	140	118	123	100	99	104	129	111	130	98
WBGene00000178	aqp-10	ZK1321.3	1017	949	858	778	947	935	772	776	899	884	841	775	422	394	413	400
WBGene00000179	aqp-11	ZK525.2	566	634	534	556	566	561	310	320	229	225	291	243	352	349	338	331
WBGene00000180	arc-1	ZK1320.6	215	186	176	193	343	309	357	336	411	412	325	307	368	301	310	312
WBGene00000181	ard-1	F01G4.2	2027	2137	2249	2225	2109	2026	2934	2845	3503	3679	2666	2582	590	607	632	662
WBGene00000182	arf-1.2	B0336.2	4620	4252	4266	4229	5745	5574	5637	5101	5380	5060	5399	5302	903	964	952	1029
WBGene00000183	arf-3	F57H12.1	3273	2919	3083	2984	4722	4654	5492	5046	5611	5409	5308	5248	764	820	811	899
WBGene00000184	arf-6	Y116A8C.12	361	358	528	482	337	322	342	317	315	307	305	360	380	398	398	421
WBGene00000186	ark-1	C01C7.1	319	319	461	486	347	375	311	306	330	326	308	297	1295	1289	1326	1395
WBGene00000187	arl-1	F54C9.10	490	446	641	656	651	623	658	648	597	574	590	610	512	517	546	575
WBGene00000188	arl-3	F19H8.3	21	22	8	8	18	20	31	27	31	32	40	46	24	56	26	28
WBGene00000189	arl-5	ZK632.8	102	110	222	237	153	134	169	168	175	165	166	159	275	280	303	306
WBGene00000190	arf-1.1	F45E4.1	49	45	18	13	31	35	23	23	11	10	23	31	28	51	18	12
WBGene00000191	arl-7	F20D1.5	47	54	7	3	4	7	7	4	7	10	54	110	21	39	13	13
WBGene00000192	arl-8	Y57G11C.13	771	797	1708	1741	615	589	563	520	555	541	603	574	670	722	737	796
WBGene00000195	arr-1	F53H8.2	107	104	135	138	176	172	124	128	101	92	125	130	382	351	327	339
WBGene00000196	aars-1	W02B12.6	392	431	516	532	353	376	385	403	430	424	392	393	901	837	863	856
WBGene00000197	aars-2	F28H1.3	3278	3427	4107	4219	4077	4017	3942	3462	3664	3264	4075	4090	2334	2419	2468	2694
WBGene00000198	art-1	C15F1.6	2013	1824	2261	2235	2605	2541	1737	1607	1534	1537	1604	1560	764	783	811	866
WBGene00000199	arx-1	Y71F9AL.16	691	714	808	860	890	864	869	774	864	890	797	794	907	914	958	992
WBGene00000200	arx-2	K07C5.1	1078	1037	1358	1341	1045	1010	805	763	806	808	802	791	992	1039	1050	1113
WBGene00000201	arx-3	Y79H2A.6	740	717	795	837	834	802	830	823	839	794	776	806	780	761	801	867
WBGene00000202	exos-4.2	Y6D11A.1	347	407	541	534	285	279	273	264	229	240	225	224	515	511	557	563
WBGene00000203	arx-5	Y37D8A.1	315	309	487	477	308	288	309	303	302	346	281	300	382	378	401	404
WBGene00000204	arx-6	C35D10.16	336	376	569	568	345	357	361	333	384	326	366	347	424	432	446	461
WBGene00000205	arx-7	M01B12.3	266	274	412	455	300	281	273	273	225	252	249	260	300	277	301	303
WBGene00000206	asb-1	F35G12.10	2501	2544	3704	3585	1527	1539	1538	1557	1406	1445	1459	1557	777	849	860	944
WBGene00000207	asb-2	F02E8.1	4269	4481	3154	3104	6000	5750	6802	6568	7118	6873	6078	5851	706	688	711	779
WBGene00000208	asc-1	Y53F4B.15	536	813	531	517	462	421	543	556	692	698	527	540	602	556	595	589
WBGene00000209	asg-1	K07A12.3	1631	1663	2139	2054	1348	1389	1433	1430	1300	1420	1220	1302	333	368	365	402
WBGene00000210	asg-2	C53B7.4	1599	1643	1299	1263	2275	2172	3293	3190	4140	4195	3164	2990	295	305	312	339
WBGene00000211	asm-1	B0252.2	141	118	113	113	118	126	372	342	469	558	269	493	270	213	229	203
WBGene00000212	asm-2	ZK455.4	271	474	243	220	222	196	105	109	129	116	118	126	225	264	204	174
WBGene00000214	asp-1	Y39B6A.20	29849	26867	16992	16713	37516	38046	15653	14648	10823	11056	14994	14615	1082	1205	1151	1305
WBGene00000215	asp-2	T18H9.2	8940	7545	5486	5263	11563	11633	5106	4885	4064	3594	4692	4882	1059	1077	1109	1240
WBGene00000216	asp-3	H22K11.1	12044	9620	6420	6303	18955	19498	21700	21026	26191	25478	19760	19379	1033	1125	1089	1213
WBGene00000217	asp-4	R12H7.2	3352	2828	2995	2918	3690	3686	4268	4307	5235	5021	4251	4225	1098	1140	1200	1261
WBGene00000218	asp-5	F21F8.3	7776	6746	3485	3451	10424	10948	5257	4797	3900	3908	4616	4538	916	989	907	1063
WBGene00000219	asp-6	F21F8.7	11176	9309	7142	6837	18404	19658	7854	7262	5874	5838	7288	7492	1035	1146	1077	1252
WBGene00000220	atf-2	K08F8.2	22	16	18	10	435	363	936	801	963	777	755	597	68	189	72	77
WBGene00000221	atf-5	T04C10.4	909	675	784	751	1466	1420	1035	979	736	697	1049	1078	510	419	499	502
WBGene00000222	atf-6	F45E6.2	102	88	112	120	167	141	81	74	91	90	109	95	434	425	409	406
WBGene00000223	atf-7	C07G2.2	1619	1760	1620	1685	1248	1173	2982	2805	3014	2846	2593	2876	1434	1530	1531	1615
WBGene00000224	atgp-1	F26D10.9	654	556	325	293	685	686	845	815	997	848	951	800	486	581	479	443
WBGene00000225	atgp-2	C38C6.2	310	436	310	329	598	545	482	446	419	397	492	403	508	473	458	424
WBGene00000226	atl-1	T06E4.3	1214	1205	1374	1467	825	818	476	522	587	574	546	513	3271	3116	3325	3377
WBGene00000227	atm-1	Y48G1BL.2	429	473	503	555	436	424	525	520	658	638	616	629	1854	1612	1711	1716
WBGene00000228	atn-1	W04D2.1	3765	3490	2239	2176	4226	4198	6754	6140	9194	8304	6656	6245	1241	1235	1378	1116
WBGene00000229	atp-2	C34E10.6	22766	24462	21928	22017	26783	25359	30858	28959	31623	31466	29017	27366	1633	1828	1797	2029
WBGene00000230	atp-3	F27C1.7	5029	5178	4580	4344	5757	5634	6885	6885	7425	7560	6685	6457	678	751	741	821
WBGene00000231	atx-2	D2045.1	2079	2047	2190	2352	2689	2631	2527	2208	2766	2408	3064	2839	2285	2264	2269	2525
WBGene00000232	avr-14	B0207.12	93	86	54	49	99	101	53	51	44	43	58	41	112	220	139	114
WBGene00000233	avr-15	R11G10.1	178	284	161	151	88	85	74	72	81	76	81	71	275	257	229	210
WBGene00000235	baf-1	B0464.7	824	841	996	982	789	791	941	983	1094	984	961	985	345	361	367	390
WBGene00000236	bag-1	F57B10.11	448	476	670	704	364	367	790	761	694	742	689	810	401	404	433	446
WBGene00000237	bam-2	Y71F9AR.1	334	296	168	167	438	459	242	244	224	216	247	236	399	484	381	386
WBGene00000238	bar-1	C54D1.6	206	215	158	146	205	227	98	95	80	90	88	100	331	292	296	254
WBGene00000239	bas-1	C05D2.4	426	388	428	393	686	655	640	657	605	618	509	527	420	413	383	357
WBGene00000240	pah-1	K08F8.4	692	1132	1111	1103	915	829	1338	1270	1554	1498	1303	1310	788	774	816	853
WBGene00000244	bbs-8	T25F10.5	18	18	12	8	19	19	9	9	13	8	25	30	24	46	25	25
WBGene00000245	bca-1	T13C5.5	385	563	337	346	262	254	228	235	143	172	208	200	420	253	394	399
WBGene00000246	bcc-1	M7.3	54	73	57	42	208	178	108	111	112	111	150	121	159	157	132	119
WBGene00000247	bec-1	T19E7.3	225	264	361	352	184	208	263	243	240	244	403	475	548	536	581	561
WBGene00000248	ben-1	C54C6.2	764	761	613	586	484	489	462	467	516	464	495	483	740	767	722	743
WBGene00000249	bir-1	T27F2.3	289	285	589	560	197	179	156	164	135	157	161	158	324	342	345	363
WBGene00000250	bir-2	C50B8.2	164	194	317	346	67	81	88	103	97	119	80	99	478	463	532	508
WBGene00000251	bli-1	C09G5.6	62	68	15	20	14828	15244	13216	12359	12857	11238	12564	11282	12	6	3	9
WBGene00000253	bli-3	F56C11.1	629	468	268	288	557	543	351	345	344	308	340	312	699	569	532	532
WBGene00000254	bli-4	K04F10.4	4549	3622	2536	2552	3320	3358	2720	2493	2583	2410	2845	2621	2458	2544	2539	2716
WBGene00000255	bli-5	F45G2.5	126	43	10	9	55	61	102	116	98	114	77	81	22	13	13	8
WBGene00000256	bli-6	Y73B6BL.34	10797	4201	290	288	9588	9593	24946	23959	23308	21947	17617	18218	156	44	67	49
WBGene00000257	bmk-1	F23B12.8	1222	1229	1172	1231	608	592	530	554	527	556	539	546	1722	1730	1791	1829
WBGene00000259	bpl-1	F13H8.10	394	417	583	557	318	335	193	205	177	176	217	208	1081	931	1034	1047
WBGene00000262	bra-1	F54B11.6	29	28	53	60	38	37	44	39	37	32	49	71	184	168	148	160
WBGene00000263		F23H11.5	1869	1996	1730	1719	2079	2038	2423	2328	2255	2332	2097	2051	256	284	286	309
WBGene00000264	brc-1	C36A4.8	220	250	355	386	144	138	157	158	196	200	173	173	836	793	854	860
WBGene00000265	brd-1	K04C2.4	295	331	587	580	227	209	211	223	198	228	212	212	1013	1003	1115	1074
WBGene00000266	bre-1	C53B4.7	782	603	290	291	1192	1216	1033	1017	863	786	939	966	407	418	364	334
WBGene00000267	bre-2	Y39E4B.9	79	60	47	44	47	51	45	56	29	32	41	38	90	79	86	64
WBGene00000268	bre-3	B0464.4	1397	1284	911	888	489	483	207	193	201	165	413	486	1084	1153	1191	1243
WBGene00000269	bre-4	Y73E7A.7	221	227	205	204	179	190	140	146	124	148	159	157	393	364	407	386
WBGene00000270	bre-5	T12G3.8	157	163	262	288	126	114	81	82	80	86	79	86	409	395	446	433
WBGene00000271	brf-1	F45E12.2	500	553	820	859	371	355	308	314	334	345	360	327	1333	1297	1401	1405
WBGene00000273	brp-1	Y79H2A.1	2217	3832	2357	2381	2321	2326	3649	3425	4748	4420	3888	3760	1210	1292	1232	1393
WBGene00000274	btf-1	F15D4.1	680	709	844	901	668	669	678	657	777	686	676	691	2085	1949	2073	2125
WBGene00000275	bub-1	R06C7.8	1597	1780	2422	2504	1032	1029	681	723	619	677	779	953	2035	2083	2172	2274
WBGene00000276	byn-1	F57B9.5	1397	1406	1338	1324	946	958	1081	1100	1296	1262	1242	1175	935	952	948	982
WBGene00000277	cab-1	C23H4.1	758	768	698	699	997	1023	561	474	503	470	637	672	727	882	762	777
WBGene00000279	cah-1	F54D8.4	31	36	28	29	35	23	10	15	12	14	21	19	86	95	114	124
WBGene00000280	cah-2	D1022.8	24	23	14	14	27	28	12	9	14	9	15	17	40	73	53	52
WBGene00000281	cah-3	K05G3.3	528	739	481	497	760	729	600	581	707	724	669	562	407	376	395	410
WBGene00000282	cah-4	R01E6.3	1139	1725	1004	1022	1296	1311	1638	1498	1510	1612	1776	1838	587	537	550	608
WBGene00000283	cah-5	R173.1	479	510	468	463	469	417	192	205	114	128	190	166	411	318	377	366
WBGene00000284	cah-6	T28F2.3	67	60	37	30	68	51	14	13	11	12	18	25	50	162	98	79
WBGene00000285	cal-1	C13C12.1	91	102	81	84	145	119	130	108	91	76	354	353	91	93	83	83
WBGene00000286	cal-2	C18E9.1	98	81	64	68	100	98	90	77	74	67	223	252	97	123	114	92
WBGene00000287	cal-3	M02B7.6	7	13	37	31	52	49	68	66	111	90	67	79	56	49	39	38
WBGene00000288	cal-4	T07G12.1	63	63	37	41	83	70	18	14	16	16	54	58	65	151	104	79
WBGene00000289	cam-1	C01G6.8	367	379	526	544	489	461	312	288	280	289	300	262	1398	1408	1455	1461
WBGene00000292	cap-1	D2024.6	1045	1063	1345	1363	1026	1003	1175	1076	1266	1206	1150	1123	743	779	810	841
WBGene00000293	cap-2	M106.5	1355	1363	1519	1514	1243	1264	1599	1494	1825	1844	1574	1652	799	816	830	898
WBGene00000294	cas-1	F41G4.2	1251	1225	1058	1074	1518	1519	1590	1385	1649	1550	2435	2926	869	812	814	815
WBGene00000295	cat-1	W01C8.6	33	31	19	17	34	39	18	17	12	13	16	23	31	63	32	28
WBGene00000296	cat-2	B0432.5	19	20	7	8	18	20	8	10	13	11	12	16	10	24	13	9
WBGene00000298	cat-4	F32G8.6	409	962	530	496	350	375	277	284	182	171	241	251	544	394	432	510
WBGene00000302	cav-2	C56A3.7	75	102	19	27	36	27	18	17	14	13	13	17	45	64	43	38
WBGene00000366	cbp-1	R10E11.1	1709	1600	1839	2055	1893	1848	2126	1963	2735	2261	2626	2240	3562	3639	3578	3868
WBGene00000367	cca-1	C54D2.5	200	182	205	205	316	321	140	133	167	152	173	151	361	395	340	287
WBGene00000368	ccb-1	T28F2.5	187	159	90	96	240	228	292	283	308	332	207	174	182	311	274	237
WBGene00000369	ccf-1	Y56A3A.20	704	691	885	993	761	734	600	574	497	445	547	533	780	799	832	894
WBGene00000370	ccg-1	Y73F8A.6	1038	942	961	866	1387	1384	1700	1761	2122	2017	1966	2285	442	434	430	432
WBGene00000371	cco-1	F26E4.9	3000	3092	3234	3073	3089	3099	4091	4066	4364	4534	3724	3664	424	459	459	497
WBGene00000373	cyp-14A5	F08F3.7	299	499	111	103	83	92	90	97	116	122	92	104	296	309	243	347
WBGene00000374	cyp-31A1	C01F6.3	137	118	160	118	211	230	178	170	166	190	165	152	261	293	264	243
WBGene00000375	cyp-44A1	ZK177.5	212	257	495	534	187	186	176	175	168	192	166	167	757	738	828	827
WBGene00000376	ccr-4	ZC518.3	1673	1592	2648	2859	1494	1481	1574	1463	1537	1516	1558	1478	2300	2417	2459	2655
WBGene00000377	cct-1	T05C12.7	4374	4570	5201	5303	4218	4104	5264	5034	6165	5952	5345	5166	1478	1585	1602	1785
WBGene00000378	cct-2	T21B10.7	4097	4301	4969	5021	3828	3754	5164	5082	6330	6141	5239	5167	1432	1510	1510	1689
WBGene00000379	cct-4	K01C8.10	3756	3868	4366	4506	3719	3662	4386	4393	5184	5169	4582	4497	1446	1518	1537	1697
WBGene00000380	cct-5	C07G2.3	7155	7343	8379	8207	6581	6273	10734	10555	13839	13546	10743	10693	1534	1681	1659	1834
WBGene00000381	cct-6	F01F1.8	3775	3762	4481	4528	3435	3209	3996	3969	4425	4342	4113	3950	1447	1545	1560	1727
WBGene00000382	cdc-6	C43E11.10	470	530	1033	1041	311	311	297	306	352	340	360	343	1023	1031	1101	1092
WBGene00000383	cdc-14	C17G10.4	728	796	1093	1255	504	499	490	445	578	548	688	634	2066	2063	2187	2241
WBGene00000386	cdc-25.1	K06A5.7	903	1074	2040	2108	579	572	711	647	763	782	744	753	1557	1565	1635	1782
WBGene00000387	cdc-25.2	F16B4.8	37	69	310	342	149	135	127	120	130	130	113	90	780	799	791	852
WBGene00000388	cdc-25.3	ZK637.11	30	57	362	406	1	0	2	2	3	19	1	1	552	554	575	575
WBGene00000390	cdc-42	R07G3.1	1507	1568	1751	1837	1390	1351	1272	1206	1155	1144	1508	1401	910	988	995	1080
WBGene00000391	cdd-1	C47D2.2	223	259	94	97	231	234	408	395	485	462	383	408	104	138	113	115
WBGene00000392	cdd-2	F49E8.4	272	249	430	408	209	209	231	255	213	234	218	198	326	287	333	355
WBGene00000393	cdf-1	C15B12.7	363	318	339	330	303	305	182	189	155	150	247	245	637	544	574	569
WBGene00000395	cdh-3	ZK112.7	72	34	52	50	318	298	165	167	306	228	317	156	704	961	712	726
WBGene00000396	cdh-4	F25F2.2	269	242	368	424	484	426	387	377	455	480	393	394	2087	2166	1657	1788
WBGene00000397	cdh-5	F08B4.2	70	26	16	17	557	584	465	404	620	528	457	429	140	280	145	195
WBGene00000401	cdh-9	F59C12.1	60	26	15	15	107	117	85	70	71	62	78	113	49	85	51	48
WBGene00000402	cdh-10	C45G7.5	8	13	13	13	2865	2523	1632	1588	1551	1406	2285	1732	37	319	54	39
WBGene00000403	casy-1	B0034.3	643	638	474	484	884	830	393	349	344	302	542	590	959	1286	978	918
WBGene00000405	cdk-1	T05G5.3	959	1046	2127	2234	699	700	440	457	352	392	406	434	879	933	954	1020
WBGene00000406	cdk-4	F18H3.5	18	26	69	71	40	29	21	23	14	20	22	21	284	259	286	247
WBGene00000407	cdk-5	T27E9.3	242	271	390	397	188	198	157	153	157	126	164	147	540	546	599	620
WBGene00000408	cdk-7	Y39G10AL.3	406	414	765	786	249	246	262	250	251	258	227	269	635	666	711	700
WBGene00000409	cdk-8	F39H11.3	243	278	582	597	255	234	172	189	184	192	219	182	971	1015	1109	1106
WBGene00000410	cdk-9	H25P06.2	338	325	340	340	284	275	312	328	310	320	315	263	628	598	637	640
WBGene00000411	cdl-1	R06F6.1	845	968	1842	1891	761	778	691	654	639	675	677	652	1142	1188	1264	1353
WBGene00000412	cdr-1	F35E8.11	26	33	25	32	20	27	15	13	16	18	16	11	24	92	26	26
WBGene00000413	cdt-1	Y54E10A.15	155	165	353	403	188	167	162	172	187	196	193	204	1087	1061	1080	1146
WBGene00000414	cec-1	ZK1236.2	522	383	381	368	584	552	528	526	526	554	422	416	458	464	448	434
WBGene00000415	ced-1	Y47H9C.4	373	423	673	706	762	697	581	494	618	633	644	833	1566	1543	1668	1706
WBGene00000416	ced-2	Y41D4B.13	369	392	801	816	206	209	208	216	210	224	206	212	595	583	635	649
WBGene00000417	ced-3	C48D1.2	508	638	1392	1499	176	187	248	233	247	284	249	263	1590	1690	1751	1844
WBGene00000418	ced-4	C35D10.9	241	261	346	352	144	138	197	194	194	205	218	218	795	772	843	841
WBGene00000419	ced-5	C02F4.1	786	902	1328	1349	631	641	503	478	519	504	621	565	2793	2718	2775	2973
WBGene00000420	ced-6	F56D2.7	239	313	504	514	255	251	266	239	302	236	393	366	821	807	898	910
WBGene00000421	ced-7	C48B4.4	1744	1627	1788	1930	1753	1803	1214	1160	1329	1261	1527	1606	2857	2813	3007	3073
WBGene00000422	ced-8	F08F1.5	1	3	39	45	18	18	32	26	32	28	42	24	248	184	191	171
WBGene00000423	ced-9	T07C4.8	364	434	928	986	236	241	430	368	448	430	391	500	694	687	744	748
WBGene00000424	ced-10	C09G12.8	457	433	500	493	551	530	408	361	367	390	448	474	708	717	720	750
WBGene00000425	ced-11	ZK512.3	59	52	46	47	56	78	25	24	14	14	8	14	121	237	144	100
WBGene00000426	ced-12	Y106G6E.5	522	582	878	898	424	394	341	369	398	386	398	355	1170	1270	1334	1326
WBGene00000431	ceh-6	K02B12.1	18	13	13	12	14	14	22	18	22	12	27	23	46	84	51	39
WBGene00000437	ceh-13	R13A5.5	72	67	39	42	93	79	116	91	118	61	115	65	90	129	97	77
WBGene00000438	ceh-14	F46C8.5	99	77	26	24	57	50	35	36	34	30	40	36	47	57	54	44
WBGene00000441	ceh-18	ZC64.3	396	318	155	150	282	260	167	177	133	152	186	181	290	330	254	252
WBGene00000442	ceh-19	F20D12.6	12	6	9	6	10	9	7	7	9	8	9	8	29	18	21	18
WBGene00000443	ceh-20	F31E3.1	146	139	118	125	236	231	108	117	98	92	124	108	280	366	272	235
WBGene00000444	ceh-21	T26C11.6	37	38	118	136	24	28	47	44	45	44	44	33	491	382	436	439
WBGene00000445	ceh-22	F29F11.5	10	17	10	7	32	36	24	24	35	17	37	17	15	39	20	15
WBGene00000447	ceh-24	F55B12.1	13	8	4	5	15	15	6	6	5	8	9	8	10	25	13	11
WBGene00000448	pros-1	K12H4.1	48	47	22	24	81	79	74	58	95	76	81	78	77	230	101	89
WBGene00000449	ceh-27	F46F3.1	16	19	4	9	19	21	18	13	18	10	25	21	26	85	27	33
WBGene00000453	ceh-32	W05E10.3	91	81	47	62	159	155	131	103	157	122	133	116	139	271	142	138
WBGene00000455	ceh-34	C10G8.6	32	25	19	17	58	47	45	42	36	56	38	31	30	76	30	30
WBGene00000458	ceh-37	C37E2.5	121	92	55	56	95	99	82	81	85	76	78	78	122	128	109	101
WBGene00000459	ceh-38	F22D3.1	593	668	1212	1236	381	386	423	415	376	360	389	318	1560	1576	1671	1740
WBGene00000460	ceh-39	T26C11.7	34	40	187	215	18	18	23	26	26	32	22	26	577	486	522	544
WBGene00000462	ceh-41	T26C11.5	31	29	66	75	43	49	56	52	50	58	46	44	254	245	275	247
WBGene00000463	ceh-43	C28A5.4	23	23	22	18	30	33	41	32	47	34	37	36	81	142	92	82
WBGene00000464	ceh-44	Y54F10AM.4	883	870	1102	1148	856	870	920	978	1004	946	967	986	1856	1709	1815	1720
WBGene00000465	cpg-1	C07G2.1	2540	3803	12996	13902	253	236	78	78	211	778	75	91	1620	1832	1806	2044
WBGene00000466	cel-1	C03D6.3	436	487	656	662	380	384	358	317	334	344	369	353	1016	983	1059	1045
WBGene00000467	cep-1	F52B5.5	417	471	756	750	267	275	236	252	252	286	250	259	1037	1048	1115	1114
WBGene00000472	cey-1	F33A8.3	5124	5120	4559	4755	6577	6476	8129	7373	8910	8242	7719	7355	872	938	916	1028
WBGene00000473	cey-2	F46F11.2	6935	8322	16535	16309	1226	1239	880	946	717	973	767	819	868	965	955	1068
WBGene00000474	cey-3	M01E11.5	3847	4592	9583	9603	1130	1177	1156	1265	1051	1292	1024	1115	816	897	890	985
WBGene00000475	cey-4	Y39A1C.3	5679	6061	6222	6319	5240	5344	6248	6294	6147	6061	5596	5686	893	926	944	1055
WBGene00000476	cfi-1	T23D8.8	52	42	27	26	62	72	38	39	37	44	65	44	49	132	65	47
WBGene00000477	cft-1	C18C4.2	80	70	34	33	91	109	91	87	129	122	107	88	129	170	135	108
WBGene00000478	cfz-2	F27E11.3	21	24	17	17	30	29	12	7	10	9	22	16	53	154	66	68
WBGene00000479	cgh-1	C07H6.5	9744	11853	19413	19598	2554	2574	1878	1786	1836	2155	2148	2051	1941	2179	2148	2401
WBGene00000480	cgp-1	Y38C9A.2	1778	2177	1369	1418	681	725	938	906	929	1000	947	943	1235	1302	1410	1462
WBGene00000481	cha-1	ZC416.8	57	52	34	33	62	55	58	50	66	54	51	56	57	98	58	55
WBGene00000482	chd-3	T14G8.1	280	327	470	524	1034	941	921	877	1267	1138	1208	1206	1481	1394	1162	1343
WBGene00000484	che-2	F38G1.1	20	14	2	2	13	14	5	8	5	4	11	19	10	52	19	16
WBGene00000485	che-3	F18C12.1	83	43	35	41	131	118	95	100	101	112	112	123	99	203	112	102
WBGene00000488	che-7	F26D11.10	17	21	9	5	17	20	6	6	3	1	13	10	19	60	37	27
WBGene00000490	che-11	C27A7.4	30	25	12	10	34	27	19	16	14	13	44	55	37	122	47	42
WBGene00000491	che-12	B0024.8	20	14	18	16	30	32	7	8	6	8	32	26	32	112	54	35
WBGene00000492	che-13	F59C6.7	19	18	10	8	20	20	44	48	48	48	38	39	15	49	20	18
WBGene00000493	che-14	F56H1.1	38	19	25	18	339	354	200	181	143	118	219	151	88	135	73	75
WBGene00000496	chs-1	T25G3.2	760	1100	3260	3560	224	221	262	264	333	520	273	304	3150	3324	3458	3683
WBGene00000497	chs-2	F48A11.1	328	129	48	50	572	600	698	572	827	734	555	592	359	438	398	345
WBGene00000498	chk-1	Y39H10A.7	341	405	782	790	304	317	392	360	402	394	373	389	887	868	942	962
WBGene00000499	chk-2	Y60A3A.12	188	194	176	174	139	127	182	183	283	289	196	201	461	342	333	333
WBGene00000500	chn-1	T09B4.10	385	402	831	858	232	230	237	233	228	246	254	235	635	639	672	686
WBGene00000501	cho-1	C48D1.3	43	36	23	21	49	48	10	10	14	9	20	24	38	101	55	46
WBGene00000502	chp-1	Y110A7A.13	833	880	1107	1130	648	631	835	858	887	811	764	791	696	682	716	749
WBGene00000503	cht-1	C04F6.3	12	5	40	53	100	108	115	82	115	93	112	106	300	426	259	325
WBGene00000506	cic-1	H14E04.5	119	135	262	253	107	102	113	117	125	135	114	114	433	411	441	435
WBGene00000507	cit-1.1	F44B9.4	414	423	467	480	354	366	252	248	260	237	296	274	834	836	889	877
WBGene00000508	cit-1.2	F44B9.3	346	346	292	304	354	331	375	320	432	310	647	549	934	943	959	965
WBGene00000509	cka-1	C28D4.2	613	718	651	637	333	315	285	294	240	248	318	302	846	788	885	915
WBGene00000510	cka-2	C52B9.1	93	91	61	61	118	118	133	118	148	128	106	117	100	110	94	76
WBGene00000511	ckb-1	B0285.8	66	58	47	54	118	109	89	82	62	68	70	69	140	131	133	111
WBGene00000512	ckb-2	B0285.9	226	266	167	162	290	289	108	106	80	88	429	488	419	286	349	321
WBGene00000514	ckb-4	F22F7.5	111	105	97	94	219	197	80	79	61	68	73	78	257	192	186	161
WBGene00000515	ckc-1	T27A10.3	303	282	345	351	306	294	289	289	227	228	218	211	374	341	363	368
WBGene00000516	cki-1	T05A6.1	143	120	27	23	99	112	135	104	159	102	131	141	103	161	109	109
WBGene00000517	cki-2	T05A6.2	372	333	432	437	171	163	219	227	244	247	231	247	661	639	702	719
WBGene00000518	ckk-1	C05H8.1	53	47	33	34	72	68	56	46	46	44	61	47	71	107	63	67
WBGene00000519	cku-70	Y47D3A.4	426	493	647	690	414	411	407	410	434	418	427	442	1038	1051	1122	1130
WBGene00000520	cku-80	R07E5.8	335	382	691	697	269	255	232	235	243	251	252	252	1102	1136	1222	1195
WBGene00000522	clc-1	C09F12.1	429	378	100	103	176	214	141	146	117	109	144	152	189	198	196	148
WBGene00000523	clc-2	C01C10.1	26	29	30	23	65	47	23	19	18	14	33	39	65	85	66	63
WBGene00000524	clc-3	ZK563.4	42	43	36	29	66	71	68	60	68	66	63	71	83	67	72	66
WBGene00000526	clc-5	C01C10.4	31	53	41	34	63	59	52	48	53	50	77	55	83	122	96	72
WBGene00000527	cle-1	C36B1.1	732	776	720	710	369	408	205	196	197	198	167	211	853	798	717	792
WBGene00000528	clh-1	T27D12.2	887	1068	769	754	725	725	459	403	424	381	611	550	902	666	693	719
WBGene00000529	clh-2	B0491.8	65	51	29	27	78	81	46	43	37	30	46	40	54	88	58	41
WBGene00000530	clh-3	E04F6.11	271	312	249	259	145	165	102	99	83	94	109	98	956	857	892	894
WBGene00000531	clh-4	T06F4.2	57	45	30	31	68	59	116	122	137	163	88	101	60	63	59	47
WBGene00000532	clh-5	C07H4.2	760	815	1151	1174	875	838	802	776	903	903	825	779	1503	1506	1585	1634
WBGene00000533	clh-6	R07B7.1	422	487	622	688	364	400	302	305	283	272	330	304	1169	1083	1215	1197
WBGene00000534	cpi-2	R01B10.1	1031	881	1322	1348	998	1044	1149	1115	1010	940	1048	1100	412	422	446	465
WBGene00000535	cpi-1	K08B4.6	885	917	983	917	436	460	1131	1110	1324	1220	1165	1397	284	297	271	301
WBGene00000536	clk-1	ZC395.2	267	238	302	307	204	220	273	276	292	320	241	260	343	302	339	348
WBGene00000539	cln-3.1	F07B10.1	123	111	117	102	193	170	86	84	84	93	95	79	246	175	233	166
WBGene00000540	cln-3.2	C01G8.2	86	87	133	140	134	113	139	133	159	156	144	135	356	328	400	361
WBGene00000541	cln-3.3	ZC190.1	56	68	43	37	107	94	26	26	31	20	26	24	129	200	124	102
WBGene00000542	clp-1	C06G4.2	2744	3016	2630	2740	2596	2479	3114	3008	4154	3908	3270	3077	1639	1656	1665	1739
WBGene00000543	clp-2	T04A8.16	361	370	475	504	292	327	261	237	231	222	333	333	1096	1094	1138	1153
WBGene00000544	clp-3	Y47H10A.1	164	148	53	40	16	17	20	26	16	19	17	20	23	8	10	16
WBGene00000545	clp-4	Y39A3CL.5	347	320	370	344	379	377	464	443	542	500	1316	2134	486	417	395	403
WBGene00000546	clp-6	Y77E11A.10	364	340	161	133	16	27	25	29	15	28	17	27	23	13	28	22
WBGene00000547	clp-7	Y77E11A.11	607	683	1085	1045	1323	1310	1691	1617	1957	1874	1623	1552	1332	1370	1396	1460
WBGene00000548	clr-1	F56D1.4	867	861	1149	1319	740	781	687	679	709	706	849	885	2401	2411	2477	2621
WBGene00000549	cls-2	R107.6	667	652	618	643	661	656	2785	2429	3211	3201	2464	3070	1560	1395	1399	1466
WBGene00000550	clu-1	F55H2.6	3103	3437	2692	2858	2501	2452	1888	1870	2213	2239	2386	2205	2964	2925	2959	3211
WBGene00000552	cmd-1	T21H3.3	3532	3341	2473	2624	4495	4301	3696	3273	3317	3110	3494	3354	1020	1130	1128	1216
WBGene00000553	cmk-1	K07A9.2	59	45	27	33	86	76	22	22	19	22	56	44	50	135	89	56
WBGene00000554	cnb-1	F55C10.1	541	486	357	336	467	526	242	248	196	183	221	228	350	380	363	336
WBGene00000557	cnc-3	R09B5.8	2	3	23	33	509	526	403	424	312	314	371	384	106	112	92	89
WBGene00000558	cnc-4	R09B5.9	119	45	7	6	14	12	606	557	477	602	908	1191	12	47	16	29
WBGene00000562	cng-1	F14H8.6	52	109	18	14	11	12	3	4	7	14	8	8	47	53	28	42
WBGene00000564	cnk-1	R01H10.8	429	493	679	739	333	336	331	342	373	360	412	365	1316	1307	1371	1415
WBGene00000565	cnt-1	Y17G7B.15	484	458	518	504	505	505	579	535	497	530	469	478	958	887	921	937
WBGene00000566	cnt-2	Y39A1A.15	801	731	697	772	532	518	661	642	634	665	434	468	1346	1263	1273	1329
WBGene00000567	cnx-1	ZK632.6	2477	2392	2707	2717	2635	2564	2214	2199	2395	2200	2252	2279	1446	1510	1554	1622
WBGene00000583	cof-2	C48E7.5	40	38	21	27	47	48	37	48	54	34	40	41	47	48	40	33
WBGene00000584	cog-1	R03C1.3	36	16	8	9	47	50	21	15	22	15	43	38	20	29	20	23
WBGene00000585	cogc-2	C06G3.10	585	546	919	958	572	528	326	296	317	290	483	381	1139	1079	1171	1147
WBGene00000591	coh-1	K08A8.3	131	115	186	209	189	190	165	140	139	136	170	154	750	726	659	701
WBGene00000592	coh-3	F08H9.1	296	304	391	430	233	246	290	308	336	301	304	320	877	857	902	939
WBGene00000594	col-3	T28C6.6	548	384	10	10	323	335	357	322	258	226	330	304	4	34	19	22
WBGene00000597	col-8	F11H8.3	963	4340	15396	15010	24	2	2	3	31	286	7	5	749	761	770	882
WBGene00000599	col-10	B0222.8	1766	1052	32	46	1098	1081	1829	1740	1774	1888	1597	1350	39	202	122	142
WBGene00000601	col-12	F15H10.1	3765	3077	63	55	87	162	242	342	221	396	101	144	6	28	10	7
WBGene00000602	col-13	F15H10.2	2952	2645	44	50	65	155	175	249	154	256	75	114	3	14	4	5
WBGene00000603	col-14	C46A5.3	7804	2886	14	12	5333	5852	11299	11195	6709	6690	7222	8136	43	177	59	65
WBGene00000606	col-17	F11G11.10	1621	288	7	7	6127	6967	14164	12858	11788	10388	9917	10337	7	377	67	67
WBGene00000608	col-19	ZK1193.1	11389	17648	19266	18871	39	20	56	129	259	1467	36	42	799	757	797	877
WBGene00000609	col-20	F11G11.11	12067	20037	25875	25120	113	65	116	179	314	1509	66	72	790	820	835	937
WBGene00000611	col-34	F36A4.10	430	212	75	81	196	224	553	563	619	672	296	401	80	91	72	67
WBGene00000615	col-38	F54C9.4	9028	2225	21	25	13232	13410	35069	34989	29624	26958	21234	19731	98	33	51	27
WBGene00000616	col-39	C09G5.4	8157	11092	93	74	217	473	768	808	987	892	646	484	29	342	163	173
WBGene00000618	col-41	T10B10.1	33	11	3	1	17	790	466	236	82	344	34	341	3	399	56	53
WBGene00000620	col-43	ZC513.8	9	10	17	8	15	24	48	46	53	53	37	35	50	68	21	39
WBGene00000625	col-48	Y54E10BL.2	2401	669	15	7	4301	4510	10396	9997	7095	6172	7174	7999	23	80	28	27
WBGene00000630	col-53	M01A12.1	23	29	21	17	20	18	23	21	18	19	22	17	35	46	31	34
WBGene00000631	col-54	F33D11.3	65	10	0	1	9	185	135	100	57	182	19	80	4	110	12	14
WBGene00000634	col-58	F26B1.4	719	230	4	5	96	124	223	244	191	252	95	96	6	41	11	12
WBGene00000636	col-60	F22D6.10	7939	3842	14	14	178	202	1106	1823	1369	2020	355	454	26	15	19	13
WBGene00000637	col-61	C01H6.1	121	82	4	4	22	25	39	33	37	46	25	21	2	11	4	2
WBGene00000641	col-65	K08C9.4	2942	1011	2	5	95	300	394	446	123	208	91	178	19	103	41	38
WBGene00000644	col-68	C50D2.4	260	210	26	17	64	80	71	79	63	63	61	68	32	34	30	37
WBGene00000645	col-69	K01A2.7	87	30	1	1	25	27	103	93	118	146	27	35	1	12	4	4
WBGene00000647	col-71	Y49F6B.10	12506	2845	39	44	15171	15359	33910	33596	26691	24296	21553	22818	48	25	27	23
WBGene00000649	col-73	F11G11.12	10327	2295	14	22	11650	12032	23885	22847	17036	15718	15658	16374	23	243	38	34
WBGene00000652	col-76	M110.1	470	270	129	123	260	288	294	272	272	257	245	270	217	311	219	209
WBGene00000653	col-77	M195.1	18863	7261	25	31	4224	4787	12632	13038	8896	9338	6089	7661	47	118	56	37
WBGene00000656	col-80	C09G5.5	4883	12403	16252	15701	283	193	335	304	431	786	381	264	776	786	811	920
WBGene00000657	col-81	F38A3.1	17929	26486	8737	8120	31	41	29	60	113	336	31	29	234	19	37	26
WBGene00000664	col-89	F17C8.2	339	116	12	13	35	44	111	125	109	132	53	66	9	29	13	8
WBGene00000665	col-90	C29E4.1	1211	499	5	5	173	868	1435	1186	2234	2390	808	1120	14	473	78	69
WBGene00000666	col-91	F09G8.6	5491	2966	5	4	28	108	65	103	101	164	42	63	3	44	14	8
WBGene00000667	col-92	W05B2.6	4692	5117	852	798	242	305	405	529	493	672	356	327	48	34	18	21
WBGene00000668	col-93	W05B2.5	4501	5940	5135	5121	226	289	212	243	226	374	227	154	438	344	393	479
WBGene00000669	col-94	W05B2.1	505	480	165	176	15	28	55	67	45	86	21	29	66	59	53	63
WBGene00000670	col-95	Y41C4A.16	16	42	497	530	3	0	5	6	8	21	5	6	714	875	847	954
WBGene00000671	col-96	Y41C4A.19	334	538	288	257	3	0	3	8	10	20	4	10	175	92	81	104
WBGene00000672	col-97	ZK1010.7	10692	3537	17	24	7391	7685	21679	21350	19245	18626	13231	15310	35	110	42	40
WBGene00000673	col-98	F14F7.1	234	1501	11076	10734	2118	1564	2016	1879	2162	1856	2781	2086	645	554	555	595
WBGene00000674	col-99	F29C4.8	115	77	41	39	391	355	403	356	288	278	247	245	48	113	53	59
WBGene00000675	col-101	K02D7.3	218	1115	13134	13400	48	28	42	36	93	604	30	41	852	941	947	1038
WBGene00000677	col-103	F56B3.1	433	2046	10262	10345	2281	1796	3505	3324	6506	6398	3764	2582	716	600	586	646
WBGene00000678	col-104	F58F6.1	5823	1707	20	14	4416	4580	10640	10717	9321	9199	6539	7255	27	82	27	35
WBGene00000680	col-106	Y77E11A.15	8721	13370	19094	18233	94	83	630	989	1047	2010	175	240	743	810	794	896
WBGene00000681	col-107	C34H4.4	7886	2784	13	16	1192	1900	4175	4570	2438	3328	1300	2009	17	213	120	117
WBGene00000683	col-109	Y38C1BA.3	2804	752	9	10	5575	6145	13721	13059	12386	11366	8642	9853	16	80	20	19
WBGene00000684	col-110	F19C7.7	93	43	28	27	3403	3399	6207	6064	6022	5924	4793	4897	96	24	9	5
WBGene00000685	col-111	F29B9.9	529	134	10	13	684	769	2089	2127	1413	1460	986	1239	28	62	24	25
WBGene00000687	col-113	C34D4.15	1724	760	12	6	149	198	358	419	294	347	162	214	33	64	33	35
WBGene00000689	col-115	Y42H9B.1	908	258	2	1	96	142	222	230	149	215	64	119	5	53	14	13
WBGene00000691	col-117	T28C6.4	778	473	15	13	409	358	468	421	323	284	461	383	4	37	23	22
WBGene00000692	col-118	T11B7.3	1154	1178	356	381	257	292	751	769	947	950	510	563	279	227	250	220
WBGene00000693	col-119	C53B4.5	5707	14560	23692	23645	69	7	16	12	118	1066	19	34	817	905	900	1014
WBGene00000694	col-120	Y11D7A.11	7749	3113	7	13	314	346	598	1012	557	766	173	228	20	5	13	5
WBGene00000696	col-122	T05A1.2	12902	19599	23193	22738	201	169	943	1196	787	1201	376	529	787	846	846	952
WBGene00000698	col-124	C24F3.6	18602	27558	34766	33412	158	92	3803	3990	6448	7146	3159	2740	870	663	855	902
WBGene00000699	col-125	C29F4.1	13578	7091	87	80	4074	4874	9053	8647	5653	5424	6282	6782	30	255	79	89
WBGene00000703	col-129	M18.1	20051	29501	16988	15462	44	54	97	397	353	1266	74	61	464	71	136	119
WBGene00000704	col-130	F08G5.4	4262	1761	5	6	801	866	2793	3042	1424	1572	811	1156	10	94	32	27
WBGene00000705	col-131	C39E9.3	59	13	0	0	120	122	204	245	253	254	151	199	3	50	13	11
WBGene00000707	col-133	F52B11.4	16814	15274	314	272	477	755	2386	2964	2520	3074	968	1140	26	27	8	1
WBGene00000708	col-135	M199.5	13	59	836	993	1	0	5	8	9	37	13	6	1105	733	899	798
WBGene00000712	col-139	F41F3.4	18573	27639	13377	12328	49	59	421	661	790	1579	199	168	298	39	70	66
WBGene00000713	col-140	F26F12.1	14559	21783	27524	27418	95	40	55	166	258	1550	40	32	748	790	803	902
WBGene00000714	col-141	T15B7.5	54	95	63	52	17	23	40	31	43	45	31	30	29	17	5	11
WBGene00000715	col-142	T15B7.4	839	3001	5004	4595	371	278	449	434	797	823	649	420	440	227	250	256
WBGene00000716	col-143	T15B7.3	149	949	8091	8189	19	2	6	2	12	48	3	2	767	849	832	947
WBGene00000717	col-144	B0222.6	4021	2386	75	76	1893	1953	2789	2700	2840	3118	2602	2065	50	180	108	124
WBGene00000718	col-145	B0222.7	5309	3052	4	5	310	427	482	647	555	804	300	319	5	35	4	3
WBGene00000719	col-146	T06E4.6	3042	4113	6	6	37	116	76	98	54	154	47	72	0	29	3	4
WBGene00000720	col-147	T06E4.4	2723	5483	266	199	771	679	726	606	731	754	854	551	15	239	125	138
WBGene00000722	col-149	B0024.1	1361	4186	836	717	7985	7067	12594	12390	11701	11471	12645	9846	122	411	101	83
WBGene00000723	col-150	B0024.2	937	994	77	73	53	46	66	98	80	122	69	61	108	53	40	49
WBGene00000726	col-153	F17C11.3	122	152	126	134	307	289	502	535	641	626	441	471	168	130	150	100
WBGene00000727	col-154	F55C10.2	2090	1124	9	12	235	318	398	432	327	440	329	318	8	79	30	17
WBGene00000728	col-155	F55C10.3	3047	1974	255	255	221	316	384	429	340	424	245	265	127	122	127	109
WBGene00000729	col-156	F57B7.3	2918	1104	2	4	21	275	114	137	85	188	10	101	5	60	6	2
WBGene00000730	col-157	T11F9.9	2068	775	5	10	227	364	509	574	292	367	214	248	13	68	10	8
WBGene00000731	col-158	D2023.7	1	2	23	29	7	3	16	9	10	38	12	12	99	149	90	107
WBGene00000732	col-159	F57B1.3	10456	11314	2160	2049	224	410	333	533	278	482	217	213	302	133	135	158
WBGene00000733	col-160	F57B1.4	8041	11796	8252	8178	621	653	655	704	1105	1690	952	658	674	695	678	772
WBGene00000734	col-161	C50B6.4	13338	8113	7	11	365	646	804	1122	552	880	211	349	7	57	11	2
WBGene00000735	col-162	Y2H9A.3	8759	4207	6	10	157	352	424	641	294	519	171	257	10	31	9	3
WBGene00000739	col-166	T07H6.3	2655	1940	330	347	3926	3704	2627	2395	1205	1240	2474	2123	132	327	226	213
WBGene00000740	col-167	T10E10.2	2285	1578	24	26	1029	1024	1022	933	744	717	946	868	9	178	86	88
WBGene00000741	col-168	T10E10.1	766	465	9	10	303	314	315	312	197	202	328	264	2	90	38	44
WBGene00000742	col-169	T10E10.5	379	256	4	5	673	625	810	777	984	1002	1009	825	2	132	41	42
WBGene00000743	col-170	T10E10.6	794	501	1	1	351	368	426	455	344	338	477	411	1	71	25	18
WBGene00000745	col-172	F38B6.5	79	18	1	0	128	147	305	285	321	344	212	250	6	57	13	13
WBGene00000746	col-173	F41C6.5	289	44	5	5	411	458	634	625	316	324	322	429	8	70	10	8
WBGene00000747	col-174	F46C8.2	353	111	0	3	39	55	96	91	57	72	31	60	4	31	10	6
WBGene00000749	col-176	ZC373.7	16	17	14	16	2114	1949	3106	3273	4975	5064	3892	3003	20	131	32	23
WBGene00000750	col-177	F59F3.2	34	48	11	13	7	13	9	10	9	8	6	4	13	45	18	17
WBGene00000751	col-178	C34F6.2	5181	8112	10145	9767	37	24	33	69	110	537	24	27	488	498	524	584
WBGene00000752	col-179	C34F6.3	1373	2025	4684	4661	14	5	12	19	31	195	10	11	374	304	381	401
WBGene00000753	col-180	C44C10.1	5642	4097	83	89	657	860	760	802	569	536	498	529	8	97	13	13
WBGene00000754	col-181	W03G11.1	15053	23498	29032	27573	186	137	482	677	473	998	208	308	807	882	872	973
WBGene00000755	col-182	R09A8.4	239	53	2	1	731	811	2792	2879	2855	3292	1575	1815	4	36	7	8
WBGene00000757	col-184	F15A2.1	7817	12105	15730	15133	129	114	233	333	289	746	93	135	752	821	816	908
WBGene00000759	col-186	E03G2.4	181	199	24	26	58	57	74	71	78	82	49	66	17	27	18	12
WBGene00000761	coq-1	C24A11.9	387	452	373	352	406	384	311	310	280	303	275	237	640	632	697	663
WBGene00000762	coq-2	F57B9.4	257	289	362	346	240	241	231	248	192	222	222	205	534	438	510	496
WBGene00000763	coq-3	Y57G11C.11	218	235	229	237	212	190	331	323	390	402	397	427	324	276	311	300
WBGene00000764	coq-4	T03F1.2	121	127	181	168	109	114	124	126	126	109	110	113	243	231	254	250
WBGene00000765	coq-5	ZK652.9	649	689	1044	982	640	628	813	786	774	779	648	614	549	533	553	562
WBGene00000766	coq-6	K07B1.2	424	427	414	387	522	500	611	610	706	688	608	558	516	518	551	569
WBGene00000767	coq-8	C35D10.4	1036	1138	1182	1208	1206	1161	1192	1142	1393	1407	1105	1058	1298	1222	1332	1341
WBGene00000768	cor-1	R01H10.3	449	398	250	243	581	626	931	943	1283	1147	875	816	185	208	167	163
WBGene00000770	cpb-1	C40H1.1	475	445	541	534	585	619	561	526	588	584	565	584	1015	1088	1146	1232
WBGene00000772	cpb-3	B0414.5	1321	1387	1964	2025	615	655	687	674	746	762	765	765	1831	1909	1950	2059
WBGene00000773	cpf-1	F28C6.3	596	638	1120	1098	378	418	392	389	382	367	413	389	805	768	829	831
WBGene00000774	cpf-2	F56A8.6	444	462	644	638	471	438	429	385	405	407	419	437	611	598	646	651
WBGene00000775	cpin-1	F38E11.3	193	226	148	169	160	146	131	125	135	130	134	127	257	190	206	171
WBGene00000776	cpl-1	T03E6.7	5723	4345	13966	13854	15811	14842	16186	15068	12002	11675	12504	13059	1003	1069	1091	1192
WBGene00000777	cpn-1	F43G9.9	1566	1672	2195	2233	924	924	1183	1141	1171	1157	1077	1147	635	694	706	790
WBGene00000778	cpn-2	D1069.2	157	41	32	28	428	414	729	655	593	542	619	603	85	125	80	77
WBGene00000779	cpn-3	F28H1.2	3946	4120	3260	3232	4325	4095	6027	5662	5583	5390	5845	5697	389	402	415	439
WBGene00000780	cpn-4	F49D11.8	775	768	584	537	732	696	1456	1312	1781	1869	1201	1407	228	198	222	223
WBGene00000781	cpr-1	C52E4.1	1845	1126	3239	3358	10230	10351	3472	3195	2569	2094	3542	3383	814	786	854	905
WBGene00000783	cpr-3	T10H4.12	257	218	75	71	341	392	317	322	400	283	336	348	205	287	153	144
WBGene00000784	cpr-4	F44C4.3	1885	1329	1894	1904	13627	14384	5514	5033	4822	3344	5762	5785	838	523	929	817
WBGene00000785	cpr-5	W07B8.5	3624	4790	3788	3648	14435	14091	8754	8243	9891	9152	8787	8017	798	561	787	745
WBGene00000786	cpr-6	C25B8.3	6883	3615	8876	8783	9265	9283	8637	8475	7629	6789	6892	7573	1036	1115	1134	1234
WBGene00000787	cps-6	C41D11.8	535	515	515	502	536	494	872	877	1174	1237	848	852	445	442	489	489
WBGene00000788	cpz-1	F32B5.8	2551	1053	4051	4082	4362	4447	6274	6082	5574	5548	4619	5025	736	739	799	861
WBGene00000789	cpz-2	M04G12.2	2245	1968	803	715	3457	3262	2734	2773	3215	3082	2475	2495	619	766	652	670
WBGene00000792	crb-1	F11C7.4	170	87	106	99	404	386	274	249	294	250	223	207	338	389	255	276
WBGene00000793	crh-1	Y41C4A.4	278	350	212	226	218	215	212	218	228	224	215	236	474	450	450	480
WBGene00000794	crn-1	Y47G6A.8	684	733	1465	1483	679	666	528	522	411	446	428	465	870	901	964	1018
WBGene00000795	crn-2	CD4.2	256	326	190	174	166	161	178	170	187	181	183	179	315	304	313	303
WBGene00000796	crn-3	C14A4.4	1234	1377	1693	1817	914	884	698	747	767	778	668	728	1663	1647	1729	1781
WBGene00000797	crn-4	AH9.2	54	79	139	130	16	15	15	13	13	16	30	59	326	275	302	309
WBGene00000798	crn-5	C14A4.5	227	259	345	331	202	208	295	284	309	310	233	246	321	303	329	340
WBGene00000799	crn-6	K04H4.6	184	183	162	148	199	208	72	84	79	72	76	79	234	265	257	195
WBGene00000800	cars-1	Y23H5A.7	2034	2046	2306	2317	2498	2450	2922	2864	2940	2850	2727	2584	1601	1658	1711	1843
WBGene00000801	cars-2	Y23H5A.1	59	59	58	55	81	104	99	104	127	122	92	100	163	164	150	128
WBGene00000802	crt-1	Y38A10A.5	19424	18183	10352	10004	30722	28889	39529	38399	46838	45134	40814	37237	1145	1276	1260	1405
WBGene00000803	csb-1	F53H4.1	49	76	191	223	51	51	40	31	47	35	82	65	835	667	744	764
WBGene00000804	csc-1	Y48E1B.12	382	435	915	906	174	186	166	174	167	188	159	164	444	420	460	463
WBGene00000812	csk-1	Y48G1C.2	496	560	611	690	470	450	572	531	572	592	545	521	1135	1107	1180	1238
WBGene00000813	csn-1	Y59A8A.1	539	549	880	852	595	560	536	554	559	518	522	538	988	979	1042	1067
WBGene00000814	csn-2	B0025.2	929	969	1479	1416	739	723	666	687	748	740	735	696	1035	1101	1135	1158
WBGene00000815	csn-3	Y38C1AA.2	648	710	1237	1187	561	535	600	555	573	590	585	572	1011	979	1042	1062
WBGene00000816	csn-4	Y55F3AM.15	486	456	715	744	436	396	319	323	333	316	333	352	891	883	920	963
WBGene00000817	csn-5	B0547.1	535	568	984	1016	388	377	384	423	400	426	392	382	724	722	769	796
WBGene00000818	csn-6	Y67H2A.6	492	529	800	806	455	426	480	464	444	450	482	472	790	765	831	856
WBGene00000819	csp-1	Y48E1B.13	27	21	5	6	3	4	3	10	10	8	11	10	46	54	54	52
WBGene00000820	csp-2	Y73B6BL.7	93	81	28	28	14	19	22	36	21	18	21	29	8	7	9	10
WBGene00000822	csq-1	F40E10.3	3424	3427	2623	2469	4163	3998	7256	7671	10572	10370	7217	6957	786	762	828	808
WBGene00000829	ctb-1	MTCE.21	22549	19577	21766	18164	23112	21286	26925	28510	34936	35310	26889	24198	857	960	947	1054
WBGene00000830	ctl-1	Y54G11A.6	56	44	31	33	81	82	75	59	75	62	85	72	19	20	23	18
WBGene00000831	ctl-2	Y54G11A.5	751	690	453	465	1058	1030	863	827	574	598	798	739	603	588	609	602
WBGene00000832	ctn-1	Y23H5A.5	211	204	206	205	471	414	650	625	811	772	581	624	424	459	391	372
WBGene00000833	cts-1	T20G5.2	8550	10247	8100	8146	11005	10903	9768	8971	8747	8026	9163	8753	1337	1448	1453	1629
WBGene00000834	cua-1	Y76A2A.2	1268	1147	1066	1142	842	833	857	794	912	899	1027	1092	1869	1788	1942	1957
WBGene00000835	cuc-1	ZK652.11	687	460	533	538	729	701	753	735	551	512	606	609	210	187	218	221
WBGene00000836	cul-1	D2045.6	1267	1346	1640	1800	1093	1067	548	592	527	503	661	643	1652	1585	1674	1744
WBGene00000837	cul-2	ZK520.4	1635	1591	2270	2395	1377	1370	1104	1058	1021	1004	1084	1126	1917	1984	2060	2167
WBGene00000838	cul-3	Y108G3AL.1	2241	2278	3060	3056	1540	1589	1576	1496	1472	1468	1543	1522	1979	2034	2143	2266
WBGene00000839	cul-4	F45E12.3	678	762	907	969	570	541	555	556	617	600	595	592	1392	1408	1480	1512
WBGene00000840	cul-5	ZK856.1	727	707	1049	1059	537	533	349	343	348	371	377	381	1397	1384	1467	1505
WBGene00000841	cul-6	K08E7.7	161	199	51	50	69	64	33	40	36	38	96	149	153	158	114	116
WBGene00000843	cup-2	F25D7.1	1000	859	1173	1198	1079	1106	1374	1307	1393	1191	1527	1604	592	606	645	668
WBGene00000845	cup-4	C02C2.3	140	147	130	122	149	150	23	17	11	10	26	34	181	168	194	155
WBGene00000846	cup-5	R13A5.1	428	447	902	931	259	258	262	252	284	300	299	258	1191	1192	1252	1300
WBGene00000854	cux-7	C07H6.8	435	454	623	683	364	333	444	452	469	444	460	424	868	853	889	918
WBGene00000857	cwn-1	K10B4.6	106	99	79	73	165	158	130	150	125	109	134	142	140	166	136	118
WBGene00000858	cwn-2	W01B6.1	40	38	38	32	143	138	102	98	74	66	91	101	76	151	80	78
WBGene00000863	cya-1	ZK507.6	437	505	800	817	230	266	276	261	283	282	297	281	1150	1171	1233	1258
WBGene00000864	cya-2	F59H6.7	6	8	10	8	8	9	11	7	11	8	10	7	17	14	8	14
WBGene00000865	cyb-1	ZC168.4	2218	2372	2816	2980	530	541	628	618	634	746	646	649	1121	1209	1242	1355
WBGene00000866	cyb-2.1	Y43E12A.1	317	436	1399	1459	54	49	45	50	60	92	45	62	752	782	809	867
WBGene00000867	cyb-2.2	H31G24.4	568	750	2323	2374	77	81	76	97	101	134	81	86	839	921	930	1010
WBGene00000868	cyb-3	T06E6.2	1108	1436	4680	5035	409	430	408	395	452	630	413	442	1176	1304	1298	1451
WBGene00000869	cyc-1	C54G4.8	5164	5361	5090	4883	5725	5475	7643	7201	8921	8890	7248	6980	1046	1113	1153	1239
WBGene00000870	cyd-1	Y38F1A.5	7	10	41	63	81	81	59	69	55	61	55	52	260	293	251	220
WBGene00000871	cye-1	C37A2.4	913	1054	1580	1659	523	495	672	644	739	786	670	736	1381	1447	1458	1602
WBGene00000872	cyk-1	F11H8.4	596	601	709	792	489	529	415	429	426	408	485	523	1595	1458	1554	1566
WBGene00000874	cyk-3	ZK328.1	884	920	1055	1117	836	868	980	939	1151	1076	1089	993	1895	1877	1944	2013
WBGene00000875	cyk-4	K08E3.6	1310	1421	1962	2061	837	851	744	761	678	724	705	691	1501	1563	1621	1709
WBGene00000876	cyl-1	C52E4.6	685	680	1048	1076	536	568	656	683	710	716	719	712	964	981	1045	1075
WBGene00000877	cyn-1	Y49A3A.5	1632	1624	1773	1719	1700	1625	2465	2550	3065	3314	2238	2141	456	480	500	528
WBGene00000878	cyn-2	ZK520.5	879	851	473	426	171	176	157	184	96	110	109	125	58	45	45	43
WBGene00000879	cyn-3	Y75B12B.5	2129	2084	2469	2383	2262	2192	2781	2690	2837	2776	2446	2485	467	500	518	564
WBGene00000880	cyn-4	F59E10.2	465	504	832	812	439	416	355	360	386	402	381	375	845	808	879	874
WBGene00000881	cyn-5	F31C3.1	5794	4700	3836	3753	8794	8382	11547	11246	11815	11328	10315	9888	587	643	623	683
WBGene00000882	cyn-6	F42G9.2	325	351	225	230	3884	3630	1596	1482	681	628	1719	1631	240	295	222	224
WBGene00000883	cyn-7	Y75B12B.2	9566	10130	12354	12259	8221	7860	8858	8810	8447	8558	8088	8112	533	581	582	633
WBGene00000884	cyn-8	D1009.2	100	96	162	196	227	203	172	175	192	174	169	184	521	450	459	441
WBGene00000885	cyn-9	T27D1.1	305	347	557	572	198	201	220	238	252	237	224	225	530	502	575	569
WBGene00000886	cyn-10	B0252.4	162	201	424	463	124	124	107	128	105	150	115	114	323	331	350	357
WBGene00000887	cyn-11	T01B7.4	281	307	367	426	229	229	247	247	237	242	247	235	305	299	335	334
WBGene00000888	cyn-12	C34D4.12	272	291	499	515	199	214	217	218	191	211	197	196	311	322	348	354
WBGene00000889	cyn-13	Y116A8C.34	619	715	991	1008	567	580	728	717	839	822	665	648	592	595	634	647
WBGene00000890	sig-7	F39H2.2	352	391	710	675	265	262	280	315	280	307	322	310	770	775	831	836
WBGene00000891	cyn-15	Y87G2A.6	629	622	873	900	667	688	757	730	765	760	724	722	1004	984	1056	1065
WBGene00000892	cyn-16	Y17G7B.9	366	376	484	560	377	342	404	415	419	412	411	444	739	726	782	779
WBGene00000893	cyn-17	ZC250.1	111	16	1	2	425	474	612	527	489	431	391	489	25	118	43	40
WBGene00000894	dab-1	M110.5	1650	1344	2692	2843	1018	1056	1095	923	839	778	1026	1237	1471	1555	1591	1722
WBGene00000895	dac-1	B0412.1	87	38	22	22	24	25	20	21	24	24	30	23	46	41	25	34
WBGene00000896	dad-1	F57B10.10	929	844	1179	1161	977	964	718	759	629	656	754	758	325	346	340	372
WBGene00000897	daf-1	F29C4.1	155	162	288	292	157	159	115	103	101	90	131	99	770	726	726	755
WBGene00000898	daf-2	Y55D5A.5	500	553	676	782	642	638	729	658	909	860	786	811	2713	2578	2734	2849
WBGene00000899	daf-3	F25E2.5	218	213	248	245	194	193	144	134	142	122	177	207	616	595	524	558
WBGene00000900	daf-4	C05D2.1	243	245	455	447	295	299	238	203	263	258	270	251	1015	907	962	936
WBGene00000901	daf-5	W01G7.1	365	398	363	403	482	470	818	651	909	725	824	732	612	638	572	581
WBGene00000902	daf-6	F31F6.5	47	10	11	8	326	259	109	87	88	78	198	234	37	81	28	31
WBGene00000903	daf-7	B0412.2	55	50	26	33	74	77	189	140	262	214	187	176	64	211	88	74
WBGene00000904	daf-8	R05D11.1	133	135	117	123	224	207	168	166	151	136	248	259	361	341	290	285
WBGene00000905	daf-9	T13C5.1	39	30	24	23	43	50	26	15	25	24	38	35	44	39	42	42
WBGene00000906	daf-10	F23B2.4	21	20	11	10	16	13	6	7	10	10	18	19	29	71	38	23
WBGene00000907	daf-11	B0240.3	17	20	7	7	20	23	7	7	9	6	22	12	23	67	38	26
WBGene00000908	daf-12	F11A1.3	320	307	247	259	436	430	471	381	479	452	456	477	521	603	488	448
WBGene00000910	daf-14	F01G10.8	153	143	99	82	123	119	229	209	271	294	277	450	156	198	170	148
WBGene00000911	daf-15	C10C5.6	1434	1411	1498	1720	1325	1363	1214	1147	1378	1316	1320	1276	2961	2916	2982	3170
WBGene00000912	daf-16	R13H8.1	956	916	863	948	1069	958	1590	1345	1404	1410	1578	1739	1723	1711	1815	1857
WBGene00000913	daf-18	T07A9.6	1057	1509	4836	5176	466	477	519	522	566	644	591	561	2554	2764	2834	3067
WBGene00000914	daf-19	F33H1.1	92	66	160	178	134	131	54	53	54	64	60	54	704	658	649	686
WBGene00000915	daf-21	C47E8.5	26906	28570	34749	35251	21245	20430	77075	71616	103557	94574	75130	74415	1965	2206	2171	2453
WBGene00000917	daf-25	Y48G1A.3	287	307	419	416	316	279	218	192	189	197	206	218	534	479	524	529
WBGene00000920	daf-28	Y116F11B.1	81	80	48	53	88	99	47	48	71	57	60	61	36	51	28	25
WBGene00000923	daf-31	K07H8.3	868	878	1179	1168	738	705	882	940	935	924	914	795	457	464	485	498
WBGene00000928	dao-2	M03A1.7	56	40	15	20	7796	7136	12213	12070	15150	15226	14291	12205	84	273	111	120
WBGene00000929	dao-3	K07E3.3	469	210	264	272	736	777	987	1001	674	624	772	849	439	365	400	403
WBGene00000931	dao-5	C25A1.10	3961	4005	2748	2842	2995	2939	3077	2946	3249	3055	3456	3436	1815	1807	1821	2016
WBGene00000933	dap-3	C14A4.2	888	910	880	883	898	859	944	967	1053	1068	887	828	689	677	694	709
WBGene00000934	dat-1	T23G5.5	41	38	22	13	32	28	6	5	6	6	8	7	35	93	50	49
WBGene00000935	daz-1	F56D1.7	1417	1627	2365	2488	853	894	918	909	1001	1015	1069	1050	1473	1530	1547	1694
WBGene00000936	dbl-1	T25F10.2	114	111	62	60	114	117	94	84	86	70	192	184	98	90	78	75
WBGene00000937	dbr-1	C55B7.8	444	460	642	611	439	389	436	430	407	408	420	387	804	752	845	875
WBGene00000938	dcp-66	C26C6.5	618	653	782	836	657	653	672	618	738	676	761	760	1394	1323	1397	1481
WBGene00000939	dcr-1	K12H4.8	1300	1333	1810	1937	1145	1176	1060	1070	1185	1150	1190	1150	3071	3096	3185	3247
WBGene00000940	dcs-1	Y113G7A.9	373	347	546	525	429	405	368	331	313	333	316	337	503	497	547	548
WBGene00000941	ddp-1	Y39A3CR.4	681	685	830	800	751	739	904	952	875	977	791	768	192	194	199	200
WBGene00000942	deb-1	ZC477.9	1862	1887	1067	1064	2985	2960	3956	3562	4877	4340	3817	3561	947	1243	948	968
WBGene00000950	deg-1	C47C12.6	80	83	39	36	53	54	34	33	39	45	29	45	52	52	50	42
WBGene00000951	deg-3	K03B8.9	60	55	29	20	50	65	29	25	22	19	40	45	50	74	48	43
WBGene00000952	del-1	E02H4.1	13	22	9	8	28	23	7	4	7	5	9	11	19	29	24	18
WBGene00000953	del-2	F58G6.6	14	13	8	6	17	21	12	11	12	10	11	11	31	55	39	35
WBGene00000955	des-2	T26H10.1	51	57	35	22	67	73	73	59	73	52	72	77	62	95	58	56
WBGene00000958	dgk-1	C09E10.2	164	155	75	78	234	208	90	84	101	92	76	102	132	310	166	155
WBGene00000959	dgk-2	F46H6.2	476	404	298	278	648	690	585	555	522	445	557	552	479	483	410	398
WBGene00000960	dgk-3	F54G8.2	9	10	5	7	9	14	3	0	3	2	3	2	13	52	18	16
WBGene00000961	dgn-1	T21B6.1	575	456	219	218	827	872	522	464	494	458	568	600	590	722	539	598
WBGene00000962	dhc-1	T21E12.4	5583	5542	4605	5295	5945	5506	4536	4252	5701	5534	5014	4723	7498	7022	7067	7663
WBGene00000963	dhp-1	R06C7.3	234	349	318	295	456	470	484	445	433	414	507	443	368	464	442	366
WBGene00000964	dhp-2	C47E12.8	271	202	148	137	504	501	560	563	531	513	525	520	153	223	187	173
WBGene00000965	dhs-1	C01G8.3	376	380	775	785	272	255	275	274	294	326	241	314	661	679	712	721
WBGene00000966	dhs-2	F55A12.4	163	128	125	134	176	167	117	121	86	93	96	95	148	112	145	109
WBGene00000967	dhs-3	T02E1.5	1363	1050	1023	1008	1636	1582	775	820	624	618	666	608	479	500	495	512
WBGene00000968	dhs-4	T05F1.10	18	22	65	64	120	97	125	131	147	142	159	135	111	118	86	82
WBGene00000969	dhs-5	F56D1.5	92	150	68	67	412	364	358	329	482	474	403	390	166	219	140	145
WBGene00000970	dhs-6	C17G10.8	660	606	822	849	1033	1026	1173	1107	1086	1046	983	941	844	829	902	915
WBGene00000971	dhs-7	E04F6.7	69	43	98	90	110	118	66	67	46	58	45	49	121	93	114	85
WBGene00000973	dhs-9	Y32H12A.3	299	206	206	215	462	441	422	411	368	378	408	385	302	262	297	284
WBGene00000974	dhs-11	Y39A1A.11	239	259	381	390	134	145	126	125	105	134	113	117	340	358	382	384
WBGene00000975	dhs-12	K08F4.9	490	543	778	801	418	448	422	420	432	452	373	355	456	428	474	494
WBGene00000976	dhs-13	F36H9.3	698	737	862	840	934	816	916	790	819	796	907	809	696	684	728	750
WBGene00000977	dhs-14	R05D8.8	349	612	217	192	193	186	135	132	103	100	105	106	313	186	271	259
WBGene00000978	dhs-15	R05D8.10	15	24	25	18	40	45	42	45	62	54	52	46	27	43	21	24
WBGene00000979	dhs-16	C10F3.2	8	15	23	17	100	92	145	140	129	108	178	135	9	43	11	11
WBGene00000980	dhs-17	F29G9.6	40	57	161	155	32	28	17	11	21	22	42	43	410	400	456	415
WBGene00000981	dhs-18	C45B11.3	325	314	181	161	314	309	102	99	70	62	92	92	286	256	282	256
WBGene00000982	dhs-19	T11F9.11	214	339	377	355	250	235	206	217	228	226	218	199	408	336	401	351
WBGene00000983	dhs-20	F35B12.2	107	238	151	140	135	158	123	119	141	130	114	116	160	197	162	126
WBGene00000984	dhs-21	R11D1.11	706	662	265	251	323	363	373	379	314	299	406	345	254	291	256	249
WBGene00000985	dhs-22	C15H11.4	815	918	1391	1415	705	662	709	690	710	714	641	669	728	765	813	844
WBGene00000986	dhs-23	R08H2.1	34	31	30	33	18	8	7	6	8	8	4	9	69	57	65	39
WBGene00000987	dhs-24	Y60A3A.10	693	711	692	671	704	642	698	674	744	742	644	692	646	670	672	700
WBGene00000988	dhs-25	F09E10.3	1225	2507	2852	2842	1726	1452	740	745	578	666	746	638	642	305	601	617
WBGene00000990	dhs-27	C04F6.5	43	40	69	73	249	212	241	232	287	254	344	266	224	231	217	219
WBGene00000991	dhs-28	M03A8.1	2510	1930	1292	1264	3374	3443	2305	2346	1562	1606	2209	2008	792	743	782	796
WBGene00000992	dhs-29	F27D9.6	103	82	84	85	600	495	530	556	578	580	601	543	117	180	102	97
WBGene00000993	dhs-30	T25G12.7	274	245	275	289	273	276	201	206	155	169	176	182	405	317	399	385
WBGene00000994	dic-1	F08B4.1	367	418	617	594	322	298	305	296	337	321	334	318	1313	1237	1339	1371
WBGene00000995	die-1	C18D1.1	132	131	296	326	345	328	254	223	140	134	192	168	1119	1117	1094	1114
WBGene00000996	dif-1	F49E8.5	933	793	1107	1127	1361	1370	1669	1615	1354	1301	1427	1374	684	660	702	744
WBGene00000998	dig-1	K07E12.1	1252	1226	535	635	1886	1674	2352	2079	3649	3400	2657	2368	751	1275	746	851
WBGene00001000	dim-1	C18A11.7	6480	6098	3324	3218	7506	7268	11056	10576	13130	12238	10548	10044	862	900	838	847
WBGene00001001	dis-3	C04G2.6	1441	1426	1658	1655	994	999	947	967	1087	1034	1110	1120	1609	1654	1662	1707
WBGene00001002	div-1	R01H10.1	415	450	784	791	393	380	413	394	450	446	458	437	1041	1062	1120	1121
WBGene00001005	dlc-1	T26A5.9	2567	2635	3045	3143	2587	2566	2894	2700	2748	2598	2683	2678	443	482	489	533
WBGene00001006	dlg-1	C25F6.2	624	348	242	246	1399	1429	971	832	876	786	992	1325	973	1261	923	918
WBGene00001007	dli-1	C39E9.14	845	825	906	970	947	904	858	835	836	794	864	819	864	858	884	901
WBGene00001008	dlk-1	F33E2.2	467	507	437	439	694	633	884	796	878	796	1135	1521	797	814	689	725
WBGene00001016	dna-2	F43G6.1	502	596	862	926	372	398	363	383	391	384	385	370	1649	1652	1786	1863
WBGene00001017	dnc-1	ZK593.5	1986	2022	1995	2028	1966	1866	1524	1503	1660	1554	1691	1719	2244	2192	2275	2325
WBGene00001018	dnc-2	C28H8.12	559	614	892	906	512	547	536	523	543	506	585	591	661	692	712	732
WBGene00001019	dnj-1	B0035.14	716	737	895	866	576	584	448	481	409	425	549	518	897	931	957	970
WBGene00001020	dnj-2	B0035.2	451	377	585	637	634	641	426	445	320	306	406	421	624	639	675	683
WBGene00001021	dnj-3	C01G10.12	85	94	158	147	70	58	61	64	58	58	45	44	204	178	221	204
WBGene00001022	dnj-4	C01G8.4	144	143	245	248	101	100	98	91	86	82	93	83	392	383	449	403
WBGene00001023	dnj-5	C04A2.7	1900	2068	3271	3537	1106	1129	1118	1122	1205	1208	1141	1105	2592	2821	2862	3070
WBGene00001025	dnj-7	C55B6.2	809	757	553	535	1196	1206	622	633	620	564	759	811	754	693	641	663
WBGene00001026	dnj-8	C56C10.13	636	676	1024	1008	589	589	528	522	582	582	554	568	1497	1527	1613	1663
WBGene00001027	dnj-9	F11G11.7	550	560	612	636	569	527	655	652	688	738	591	678	996	923	955	992
WBGene00001028	dnj-10	F22B7.5	625	699	788	803	644	655	628	641	730	708	634	600	820	790	831	831
WBGene00001029	dnj-11	F38A5.13	2670	2765	3760	3874	2057	1971	1105	1159	1103	1058	1181	1193	1494	1515	1545	1664
WBGene00001030	dnj-12	F39B2.10	2988	3024	3949	4057	2925	2774	4410	4286	5215	4686	4485	4464	1189	1260	1263	1391
WBGene00001031	dnj-13	F54D5.8	1839	1980	2434	2467	1868	1687	8879	8817	4900	4904	5785	5650	978	1024	1043	1115
WBGene00001032	dnj-14	K02G10.8	293	260	276	265	379	352	293	289	297	216	432	330	431	402	422	402
WBGene00001033	dnj-15	K08D10.2	207	201	362	345	157	148	176	196	176	193	166	166	317	310	332	324
WBGene00001034	dnj-16	R74.4	683	666	775	766	430	413	413	403	390	420	617	728	775	773	834	823
WBGene00001035	dnj-17	T03F6.2	394	462	614	643	392	373	432	440	480	490	421	415	808	800	797	815
WBGene00001036	dnj-18	T04A8.9	156	189	330	329	124	128	110	135	127	142	104	96	364	365	402	385
WBGene00001037	dnj-19	T05C3.5	3737	3732	4461	4687	3414	3302	4064	3952	4276	4018	4074	4056	1175	1257	1257	1367
WBGene00001038	dnj-20	T15H9.7	5046	4588	2975	2870	4949	4798	3677	3272	3054	2760	3899	3927	1396	1421	1424	1521
WBGene00001039	dnj-21	T19B4.4	254	271	351	368	297	301	334	354	287	301	252	242	196	173	186	186
WBGene00001040	dnj-22	T23B12.7	504	551	987	975	329	337	257	276	265	250	298	285	576	602	648	648
WBGene00001041	dnj-23	T24H10.3	407	488	993	1001	278	278	284	312	280	296	330	307	614	621	661	688
WBGene00001042	dnj-24	W03A5.7	371	297	158	140	361	386	588	513	439	391	414	433	183	181	144	144
WBGene00001043	dnj-25	W07A8.3	682	583	649	733	527	530	562	514	514	549	476	505	1165	1183	1210	1239
WBGene00001044	dnj-26	Y39C12A.8	130	155	312	292	48	40	58	52	66	58	58	75	452	433	498	476
WBGene00001045	dnj-27	Y47H9C.5	195	150	203	223	1193	1177	1067	973	1268	1165	1229	1269	616	609	533	540
WBGene00001046	dnj-28	Y54E10BL.4	336	302	371	369	145	167	175	189	158	164	173	203	722	626	749	757
WBGene00001047	dnj-29	Y63D3A.6	2861	2592	2660	2607	3624	3562	3659	3525	3524	3145	3464	3400	1588	1623	1623	1917
WBGene00001048	dnj-30	Y71F9B.16	379	374	561	572	358	353	363	380	331	358	339	342	442	450	466	475
WBGene00001049	dog-1	F33H2.1	364	401	599	579	441	419	373	373	411	418	400	400	1261	1208	1321	1328
WBGene00001050	dom-3	F54C1.2	166	186	296	288	148	157	125	138	130	146	123	121	404	415	469	480
WBGene00001051	cks-1	C09G4.3	469	530	1275	1304	390	382	435	428	387	436	466	444	493	538	547	601
WBGene00001052	dop-1	F15A8.5	44	37	28	27	34	43	17	22	18	18	32	35	37	77	47	47
WBGene00001053	dop-2	K09G1.4	47	35	29	29	56	53	14	16	15	12	36	24	89	117	89	62
WBGene00001054	dpf-1	T23F1.7	206	125	60	71	164	131	100	101	82	63	74	61	114	123	99	84
WBGene00001055	dpf-2	C27C12.7	492	892	525	511	253	250	100	107	116	120	127	130	947	637	756	790
WBGene00001056	dpf-3	K02F2.1	1724	1861	2569	2737	1523	1542	1473	1433	1566	1522	1513	1522	2002	2094	2162	2315
WBGene00001057	dpf-4	F01F1.5	981	1075	1289	1265	1059	988	1148	1072	1268	1118	1196	1125	1134	1064	1149	1211
WBGene00001058	dpf-5	R11E3.8	1683	1737	2418	2503	1553	1595	1945	1765	2089	1889	1833	1816	1636	1639	1752	1830
WBGene00001059	dpf-6	F44B9.1	28	33	38	34	856	912	461	363	413	332	437	393	200	223	194	173
WBGene00001060	dpf-7	R11E3.7	369	462	701	700	288	281	222	222	239	228	248	226	1087	1082	1182	1190
WBGene00001061	dpl-1	T23G7.1	460	535	1026	1033	330	334	311	303	309	320	346	325	1331	1324	1364	1426
WBGene00001064	dpy-2	T14B4.6	12	19	14	14	3603	3279	5000	4908	6790	6324	5802	5075	87	463	138	141
WBGene00001066	dpy-4	Y41E3.2	8287	1843	16	21	12095	13129	24902	23321	14139	12246	16813	18035	19	299	52	50
WBGene00001067	dpy-5	F27C1.8	8456	2012	12	17	12822	14007	28968	26446	17058	13314	18565	18019	31	425	77	84
WBGene00001068	dpy-6	F16F9.2	9	25	51	59	929	632	364	331	735	590	977	447	133	579	213	146
WBGene00001069	dpy-7	F46C8.6	12	12	8	8	3770	3235	5944	5956	7470	7466	5487	4734	74	379	113	113
WBGene00001070	dpy-8	C31H2.2	27	26	10	17	5497	4799	10312	9791	8613	9932	8908	7974	17	354	42	51
WBGene00001071	dpy-9	T21D12.2	12	18	25	28	2894	2639	4370	4179	4335	4084	4684	4079	35	279	50	50
WBGene00001072	dpy-10	T14B4.7	20	26	44	49	4214	3597	5974	5854	8613	8228	7115	6136	270	644	330	323
WBGene00001073	dpy-11	F46E10.9	1414	939	1319	1358	7472	7163	9451	8498	9545	8416	9025	8449	758	820	811	843
WBGene00001074	dpy-13	F30B5.1	8362	1743	19	21	11557	12686	23164	21390	12206	10450	15433	16484	17	293	45	40
WBGene00001076	dpy-17	F54D8.1	12	18	18	30	47	37	2093	1641	5400	3859	2154	1418	333	684	469	494
WBGene00001077	dpy-18	Y47D3B.10	2263	1018	287	306	3458	3309	3783	3428	2984	2430	3944	3737	558	642	517	513
WBGene00001078	dpy-19	F22B7.10	23	21	75	87	195	207	206	197	201	228	182	214	396	350	345	319
WBGene00001079	dpy-20	T22B3.1	34	29	2	1	266	270	485	379	524	274	543	266	3	80	15	7
WBGene00001080	dpy-21	Y59A8B.1	398	431	310	394	490	480	691	685	892	844	954	921	1556	1455	1362	1513
WBGene00001081	dpy-22	F47A4.2	772	676	680	752	1085	1034	609	589	671	681	698	632	2380	2095	1884	1973
WBGene00001082	dpy-23	R160.1	351	308	465	461	747	726	602	554	441	383	612	555	737	709	663	685
WBGene00001085	dpy-26	C25G4.5	994	1030	1503	1549	880	883	697	703	723	700	778	740	2153	2101	2211	2273
WBGene00001086	dpy-27	R13G10.1	312	301	502	542	765	739	780	706	1073	804	1108	920	1374	1377	1282	1310
WBGene00001087	dpy-28	Y39A1B.3	599	590	785	834	537	556	617	603	753	676	999	1077	2087	2091	2176	2261
WBGene00001088	dpy-30	ZK863.6	812	788	1095	1102	724	709	820	789	707	750	772	731	373	404	411	438
WBGene00001089	dre-1	K04A8.6	500	455	274	300	1718	1569	1123	967	941	465	1103	540	748	905	693	651
WBGene00001090	drh-1	F15B10.2	480	504	684	664	453	452	296	338	300	308	333	340	1346	1340	1401	1398
WBGene00001091	drh-2	C01B10.1	472	398	336	291	644	663	525	560	558	584	442	439	608	570	542	501
WBGene00001093	drp-1	T12E12.4	957	1115	1582	1658	865	810	585	562	623	592	717	662	1587	1612	1705	1777
WBGene00001094	dars-1	B0464.1	3373	3554	3625	3460	3245	3191	3507	3364	3761	3644	3486	3452	1289	1367	1407	1513
WBGene00001095	dars-2	F10C2.6	302	294	390	370	262	267	264	262	286	278	238	224	772	733	799	766
WBGene00001099	dsc-4	K02D7.4	1572	1561	535	523	2462	2526	841	803	524	608	732	623	1017	1009	807	916
WBGene00001101	dsh-1	C34F11.9	252	241	245	251	367	331	304	289	331	310	301	271	690	717	667	651
WBGene00001102	dsh-2	C27A2.6	409	466	1064	1097	228	240	258	258	294	291	261	248	1349	1348	1457	1483
WBGene00001109	dsl-7	F15B9.9	78	51	4	2	4	9	8	5	3	7	6	7	12	23	11	12
WBGene00001110	duo-1	F38B7.5	294	356	493	513	178	165	184	175	208	205	174	180	1229	1166	1267	1253
WBGene00001112	duo-3	Y106G6H.12	513	608	981	1002	344	330	297	315	355	354	368	343	1654	1639	1783	1857
WBGene00001113	dur-1	F25H8.5	601	449	145	144	1635	1548	2581	2462	3029	2796	2705	2569	154	315	196	177
WBGene00001115	dyb-1	F47G6.1	79	61	49	45	96	101	76	68	95	78	78	69	139	160	132	126
WBGene00001116	dyc-1	C33G3.1	163	146	74	75	218	197	139	111	121	108	119	113	119	222	147	129
WBGene00001117	dyf-1	F54C1.5	19	16	14	13	22	17	19	24	20	20	31	39	35	70	46	36
WBGene00001118	dyf-2	ZK520.3	32	28	21	23	46	39	38	24	35	32	25	45	77	119	70	54
WBGene00001119	dyf-3	C04C3.5	15	22	19	29	28	24	22	21	16	22	26	27	74	77	33	29
WBGene00001121	dyf-5	M04C9.5	16	11	8	7	15	13	2	5	7	4	16	15	23	57	28	20
WBGene00001122	dyf-6	F46F6.4	25	12	21	18	18	21	14	13	14	10	29	34	23	43	31	19
WBGene00001123	dyf-7	C43C3.3	83	49	23	16	60	58	8	9	6	5	14	19	69	125	68	65
WBGene00001127	dyf-11	C02H7.1	7	11	7	14	7	14	10	7	9	8	20	27	21	50	29	21
WBGene00001130	dyn-1	C02C6.1	519	552	693	773	761	751	608	520	505	516	670	766	1440	1352	1331	1470
WBGene00001131	dys-1	F15D3.1	1157	948	659	720	2517	2349	2593	2324	3055	2741	2508	2251	1500	1563	1157	1308
WBGene00001132	alp-1	T11B7.4	2575	2220	1279	1223	3169	3216	5360	4980	7345	6822	5263	4920	720	805	636	537
WBGene00001134	eat-3	D2013.5	1279	1387	1495	1557	1136	1105	970	978	1128	1096	1229	1280	1866	1843	1914	1988
WBGene00001135	eat-4	ZK512.6	58	41	28	25	48	42	13	8	10	14	20	15	77	147	96	71
WBGene00001136	eat-5	F13G3.8	16	28	18	7	24	21	25	17	17	19	22	15	16	17	20	11
WBGene00001137	eat-6	B0365.3	11394	12733	8443	8550	11784	11237	11592	10231	12772	12436	10924	9801	2579	2845	2843	3134
WBGene00001145	eat-16	C16C2.2	271	201	173	168	370	325	262	215	250	220	457	463	417	468	406	372
WBGene00001148	eat-20	H30A04.1	231	133	137	166	779	839	580	479	528	473	470	573	722	665	658	603
WBGene00001149	bcat-1	K02A4.1	3498	3185	2176	2211	2265	2135	2599	2403	2086	2128	3070	4085	1150	1050	1172	1217
WBGene00001150	ech-1.1	C29F3.1	159	151	55	55	72	75	45	54	39	36	54	40	69	175	52	52
WBGene00001151	ech-2	F38H4.8	428	432	534	536	395	401	361	374	320	366	335	288	450	421	461	469
WBGene00001152	ech-3	F43H9.1	147	129	102	120	151	148	127	136	114	123	123	130	235	179	202	202
WBGene00001153	ech-4	R06F6.9	1180	1058	1092	1126	1458	1438	1567	1547	1597	1578	1392	1350	779	768	829	857
WBGene00001154	ech-5	F56B3.5	759	781	918	871	896	875	1054	1059	1278	1198	946	904	490	507	531	537
WBGene00001155	ech-6	T05G5.6	10686	11492	9273	9102	11531	10834	12812	12694	11510	11714	10727	9908	833	737	924	1012
WBGene00001156	ech-7	Y105E8A.4	666	630	948	998	1441	1312	1207	1200	1415	1474	1153	1120	454	462	508	468
WBGene00001157	ech-8	F01G10.2	121	106	96	110	156	162	152	162	161	142	113	136	314	268	325	280
WBGene00001158	ech-9	F01G10.3	32	32	9	8	161	212	73	79	104	120	136	138	70	84	12	37
WBGene00001159	eff-1	C26D10.5	63	46	36	38	257	269	467	342	546	443	563	574	78	155	79	62
WBGene00001160	efk-1	F42A10.4	612	730	882	935	647	619	3382	3131	4446	3924	3229	3549	1418	1422	1486	1520
WBGene00001161	efl-1	Y102A5C.18	246	305	617	692	209	190	210	209	211	220	218	233	751	760	821	808
WBGene00001162	efl-2	Y48C3A.17	137	143	245	254	107	104	170	174	216	206	160	163	539	526	561	536
WBGene00001163	efn-2	C43F9.8	124	93	52	52	148	144	151	130	119	124	159	153	115	198	135	112
WBGene00001164	efn-3	F15A2.5	67	66	97	90	12	14	13	14	9	9	9	14	150	67	97	97
WBGene00001165	efn-4	F56A11.3	30	33	80	72	72	67	61	64	57	47	56	57	227	234	207	195
WBGene00001166	eftu-2	ZK328.2	2158	2068	2527	2629	2283	2200	1979	1911	2160	2030	2102	2109	1969	1999	2055	2148
WBGene00001167	eef-2	F25H5.4	54811	58551	51837	50725	59335	57081	72357	69902	84123	81492	72711	69842	2395	2692	2637	2977
WBGene00001168	eef-1A.1	F31E3.5	87375	91435	90426	87106	88086	84297	127832	128057	152775	151936	124962	118366	1362	1549	1508	1702
WBGene00001169	eef-1A.2	R03G5.1	10134	10329	3869	3608	17309	16663	11370	10324	10010	8772	12730	11610	1204	1421	1261	1358
WBGene00001171	egl-2	F16B3.1	60	47	30	28	58	69	60	46	76	74	75	88	56	147	79	62
WBGene00001172	egl-3	C51E3.7	820	747	503	510	1328	1301	1171	986	1371	1191	1183	1215	863	1145	938	930
WBGene00001173	egl-4	F55A8.2	3250	3750	3725	3775	3557	3377	3638	3234	3625	3382	3500	3378	2055	2114	2159	2331
WBGene00001174	egl-5	C08C3.1	22	19	14	10	27	26	25	20	19	8	32	24	43	76	57	41
WBGene00001175	egl-6	C46F4.1	13	17	50	73	13	12	6	9	7	7	8	9	239	176	183	178
WBGene00001177	egl-8	B0348.4	1194	1090	693	695	1129	1061	845	860	948	892	830	777	1310	1352	1205	1221
WBGene00001178	egl-9	F22E12.4	154	173	186	213	252	256	182	137	152	162	238	257	709	675	605	601
WBGene00001179	egl-10	F28C1.2	378	345	274	259	344	343	226	211	239	214	218	202	569	599	506	469
WBGene00001182	egl-13	T22B7.1	189	205	146	143	345	357	184	160	166	158	196	204	278	288	244	237
WBGene00001184	egl-15	F58A3.2	144	134	100	113	491	510	409	377	445	392	559	662	286	406	286	253
WBGene00001185	egl-17	F38G1.2	20	15	5	5	21	23	28	29	29	22	22	27	10	13	6	6
WBGene00001186	egl-18	F55A8.1	49	47	202	237	79	85	81	65	87	78	75	53	550	602	571	598
WBGene00001187	egl-19	C48A7.1	531	469	257	281	708	692	816	735	1012	951	798	711	568	814	529	491
WBGene00001188	egl-20	W08D2.1	75	69	50	48	100	87	89	71	81	70	90	77	118	223	155	120
WBGene00001189	egl-21	F01D4.4	775	744	525	503	1154	1197	999	873	1108	890	1054	1004	626	781	687	666
WBGene00001190	egl-23	Y37A1B.11	86	83	54	60	103	103	79	81	86	86	93	93	82	102	88	76
WBGene00001193	egl-26	C23H3.1	75	53	149	161	118	113	70	67	59	54	107	115	402	367	394	370
WBGene00001194	egl-27	C04A2.3	1003	1223	1616	1755	779	727	955	845	953	963	760	773	1902	1946	2038	2102
WBGene00001196	egl-30	M01D7.7	1097	963	562	561	1854	1745	1759	1441	2320	2130	1597	1532	1054	1301	1156	1316
WBGene00001202	egl-36	R07A4.1	58	53	39	36	36	38	18	11	11	12	16	22	70	67	73	62
WBGene00001204	egl-38	C04G2.7	17	12	5	10	31	27	20	23	32	21	43	27	23	61	31	29
WBGene00001207	egl-43	R53.3	33	39	18	19	58	51	47	39	48	42	48	45	55	143	74	67
WBGene00001208	egl-44	F28B12.2	452	425	255	238	500	471	509	451	556	540	495	544	412	467	370	353
WBGene00001209	egl-45	C27D11.1	4616	4769	4135	4351	4820	4696	5518	5346	6442	5856	5717	5226	2503	2593	2580	2808
WBGene00001211	egl-47	C50H2.2	13	10	9	4	9	7	8	10	9	10	10	11	20	33	27	14
WBGene00001214	ego-1	F26A3.3	860	951	944	1003	650	613	747	744	882	896	867	907	2531	2424	2568	2611
WBGene00001215	ego-2	Y53H1C.2	785	646	648	712	1015	988	966	857	967	894	897	819	1967	1747	1810	1926
WBGene00001224	ehs-1	ZK1248.3	555	555	753	754	473	447	509	525	607	628	446	438	1367	1390	1466	1535
WBGene00001225	eif-3.B	Y54E2A.11	3137	3218	3147	3053	3478	3249	4594	4391	5756	5740	4578	4450	1787	1862	1818	1997
WBGene00001226	eif-3.C	T23D8.4	5333	5186	4992	5089	5404	5160	5436	5317	5890	5912	5473	5255	2242	2318	2341	2509
WBGene00001227	eif-3.D	R08D7.3	3229	3338	3301	3227	3221	3155	3732	3807	4389	4186	3834	3799	1291	1306	1341	1441
WBGene00001228	eif-3.E	B0511.10	2054	2174	2204	2206	2294	2216	2939	2855	3401	3340	2952	2875	1106	1150	1119	1220
WBGene00001229	eif-3.F	D2013.7	1885	1868	2111	2103	1864	1753	2109	2113	2223	2213	2015	2101	832	881	899	943
WBGene00001230	eif-3.G	F22B5.2	1592	1584	1565	1537	1444	1411	1748	1820	1996	2020	1846	1762	749	742	734	804
WBGene00001231	eif-3.H	C41D11.2	1300	1293	1289	1251	1299	1262	1473	1458	1585	1529	1470	1463	936	968	947	1036
WBGene00001232	eif-3.I	Y74C10AR.1	2289	2120	2063	2069	2426	2284	3326	3141	3869	3904	3163	3155	829	872	867	949
WBGene00001233	eif-3.K	T16G1.11	1063	1093	1136	1117	1193	1112	1276	1251	1286	1272	1160	1210	563	585	602	646
WBGene00001234	eif-6	C47B2.5	1223	1434	1102	1149	932	953	908	902	881	920	883	946	587	596	605	640
WBGene00001235	elb-1	Y41C4A.10	145	158	221	231	173	183	183	170	126	131	171	138	226	189	212	214
WBGene00001236	elc-1	Y82E9BR.15	285	285	383	400	330	334	305	297	300	298	312	329	284	291	297	316
WBGene00001239	elo-1	F56H11.4	3186	2940	3372	3263	4047	3777	2804	2632	3056	2868	3043	2758	797	854	872	928
WBGene00001240	elo-2	F11E6.5	1493	1672	2230	2151	2352	2091	616	571	383	423	679	562	727	711	776	787
WBGene00001241	elo-3	D2024.3	1112	903	957	961	1261	1291	874	796	615	594	732	695	713	755	769	812
WBGene00001242	elo-4	C40H1.4	149	124	25	25	393	412	623	640	585	562	511	507	57	84	62	57
WBGene00001243	elo-5	F41H10.7	2553	2233	3248	3223	3094	2771	401	451	353	340	447	428	646	660	689	701
WBGene00001244	elo-6	F41H10.8	4232	3238	5758	5663	5906	5421	1338	1373	1179	1259	1202	1099	712	716	767	806
WBGene00001246	elo-8	Y47D3A.30	252	240	56	43	11	13	13	26	8	20	11	12	6	2	4	2
WBGene00001247	elo-9	Y53F4B.2	317	196	158	155	181	189	90	109	76	76	74	78	228	162	179	190
WBGene00001248	elp-1	F38A6.2	213	179	122	117	157	149	84	91	91	90	136	184	260	230	214	177
WBGene00001249	elt-1	W09C2.1	134	123	63	63	72	59	45	60	55	44	36	36	239	347	279	272
WBGene00001250	elt-2	C33D3.1	318	283	159	144	321	326	298	273	186	189	250	214	261	238	224	206
WBGene00001251	elt-3	K02B9.4	276	358	224	248	295	287	306	254	164	144	249	177	353	352	319	291
WBGene00001253	elt-6	F52C12.5	19	21	21	20	58	64	39	42	63	58	50	38	76	115	81	71
WBGene00001258	emb-4	Y80D3A.2	1640	1626	1649	1848	1581	1479	1624	1583	1887	1702	1864	1811	2611	2572	2607	2759
WBGene00001259	emb-5	T04A8.14	3079	3396	4408	4670	2851	2829	2998	2898	3765	3151	3851	3472	3309	3463	3518	3765
WBGene00001262	emb-8	K10D2.6	1200	1203	1309	1345	1728	1614	1100	1039	993	962	1067	1021	1395	1371	1458	1519
WBGene00001263	emb-9	K04H4.1	14226	13030	6157	6296	15115	14480	23481	20520	30721	27494	24333	22681	2493	2658	2370	2686
WBGene00001281	emb-27	F10B5.6	503	538	968	979	374	361	267	272	258	286	290	278	1175	1146	1226	1194
WBGene00001284	emb-30	F54C8.3	857	833	1136	1229	729	674	566	583	583	569	592	575	1736	1731	1834	1869
WBGene00001303	emo-1	F32D8.6	3310	2846	3032	3050	3606	3436	3724	3599	2686	2614	3040	2977	324	350	349	390
WBGene00001309	emr-1	M01D7.6	325	367	577	600	262	288	331	326	324	382	330	331	393	433	444	468
WBGene00001320	ent-1	ZK809.4	1108	1105	1155	1210	908	892	928	943	994	1036	1066	1027	1089	1083	1191	1224
WBGene00001324	eor-1	R11E3.6	446	479	684	730	314	329	255	297	276	280	297	272	1364	1386	1432	1458
WBGene00001325	eor-2	C44H4.7	130	111	161	166	186	185	163	164	247	234	270	296	673	619	595	595
WBGene00001328	epi-1	K08C7.3	5091	4672	2322	2418	6593	6326	8651	7973	12060	10711	8858	8007	1777	2171	1446	1717
WBGene00001329	epn-1	T04C10.2	522	401	726	754	1145	1116	1296	1079	1217	1028	1536	1681	1148	1140	1121	1169
WBGene00001330	eps-8	Y57G11C.24	1446	1232	583	590	1823	1746	1453	1325	1119	1038	1267	1162	895	1013	877	900
WBGene00001331	erd-2	F09B9.3	1007	712	717	666	1933	1881	1169	1047	833	722	1266	1134	510	501	493	497
WBGene00001332	eri-1	T07A9.5	290	323	595	612	236	233	187	230	210	212	223	218	965	953	1048	1029
WBGene00001333	erm-1	C01G8.5	4594	4406	3572	3620	5137	5096	3931	3654	3949	3550	4062	3831	1672	1761	1778	1916
WBGene00001334	ero-1	Y105E8B.8	849	797	762	791	921	892	850	834	802	752	907	940	901	922	983	1021
WBGene00001335	erp-1	F35A5.8	118	119	187	181	133	110	85	76	58	60	84	72	374	349	359	357
WBGene00001336	qars-1	Y41E3.4	2360	2298	2430	2439	2520	2466	3623	3422	4346	4310	3582	3473	1615	1521	1567	1719
WBGene00001337	ears-1	ZC434.5	4265	4681	4192	4330	3809	3786	4693	4520	5412	5022	4783	4735	2459	2459	2531	2719
WBGene00001338	ears-2	T07A9.2	245	244	303	295	264	282	172	195	163	158	176	174	498	458	498	451
WBGene00001340	etr-1	T01D1.2	923	847	826	853	974	931	1125	1110	1325	1267	1126	811	1088	1146	1200	1203
WBGene00001345	fos-1	F29G9.4	402	359	141	131	286	299	249	251	288	256	468	525	243	275	227	230
WBGene00001352	evl-14	H38K22.1	940	1035	1467	1515	717	708	596	570	619	634	654	646	2485	2430	2542	2604
WBGene00001358	evl-20	F22B5.1	179	192	284	289	112	132	114	104	80	98	101	112	266	241	262	255
WBGene00001365	exc-4	Y105E8A.22	206	201	244	253	290	281	355	336	329	376	324	363	713	755	663	702
WBGene00001366	exc-5	C33D9.1	198	231	181	167	274	267	236	234	261	258	263	246	376	424	328	289
WBGene00001368	exc-7	F35H8.5	284	179	100	100	407	414	371	370	305	316	394	373	220	290	215	176
WBGene00001371	exl-1	F26H11.5	454	439	368	340	303	315	237	252	152	157	169	199	319	308	344	326
WBGene00001372	exo-3	R09B3.1	567	729	1348	1375	334	319	321	297	298	354	320	281	605	604	644	676
WBGene00001373	exp-1	H35N03.1	20	14	11	12	21	26	7	11	10	7	17	11	18	30	20	20
WBGene00001374	exp-2	F12F3.1	92	80	52	49	99	81	53	65	89	79	94	70	60	128	85	63
WBGene00001377	eya-1	C49A1.4	10	7	15	15	25	21	6	7	8	6	13	10	93	105	70	76
WBGene00001385	far-1	F02A9.2	6776	7178	5682	5487	8936	8833	14010	13408	15940	15420	13061	12666	485	551	530	596
WBGene00001386	far-2	F02A9.3	18960	20976	19495	18272	18243	16981	30325	28648	34349	34116	29053	26994	504	562	553	632
WBGene00001387	far-3	F15B9.1	39	5	66	51	46	50	86	83	89	104	102	72	161	71	53	65
WBGene00001389	far-5	F15B9.3	39	77	134	108	237	241	201	188	166	152	225	179	163	159	137	132
WBGene00001390	far-6	W02A2.2	796	776	637	647	701	671	949	944	960	924	1074	1104	371	307	330	346
WBGene00001391	far-7	K01A2.2	19	27	45	42	177	164	240	265	312	335	245	220	40	71	52	43
WBGene00001392	far-8	K02F3.3	746	768	783	767	1042	1031	1194	1193	1245	1107	1160	1109	448	462	462	491
WBGene00001393	fat-1	Y67H2A.8	2626	2981	3482	3440	4173	3763	6868	6580	9859	9901	6952	6527	1062	1095	1143	1246
WBGene00001394	fat-2	W02A2.1	4135	3182	6529	6171	7267	7090	12603	12478	17863	18484	12795	12228	957	989	1035	1099
WBGene00001395	fat-3	W08D2.4	1167	1659	1935	1822	1798	1561	1930	1908	2542	2485	2254	2065	793	719	792	796
WBGene00001396	fat-4	T13F2.1	1736	2132	2909	2698	3531	3434	3808	3540	4302	4191	3905	3762	1084	1141	1202	1233
WBGene00001397	fat-5	W06D12.3	65	17	251	203	115	114	87	86	41	40	57	59	394	143	324	260
WBGene00001398	fat-6	VZK822L.1	2127	1322	3416	3152	3749	3749	6454	6280	6507	6610	5904	5770	817	808	846	871
WBGene00001399	fat-7	F10D2.9	864	337	2644	2259	989	795	528	523	362	436	496	512	571	594	642	528
WBGene00001401	fbf-1	H12I13.4	252	262	219	219	249	247	362	353	496	478	373	392	650	584	614	660
WBGene00001402	fbf-2	F21H12.5	308	323	272	238	284	254	495	508	705	712	541	549	581	430	440	454
WBGene00001403	fbl-1	F56H11.1	831	600	344	348	245	216	170	174	200	185	185	188	548	468	564	484
WBGene00001404	fbp-1	K07A3.1	1155	1453	2053	2070	2054	1979	2507	2388	2142	2052	1958	1937	832	833	896	956
WBGene00001405	fce-1	C04F12.10	1042	1008	1097	1045	971	961	959	932	935	887	896	944	883	888	939	967
WBGene00001406	fce-2	F48F5.5	213	206	211	207	206	190	202	201	197	186	214	214	404	382	406	412
WBGene00001410	feh-1	Y54F10AM.2	432	488	43	50	109	125	143	133	127	161	111	132	75	139	99	86
WBGene00001411	fem-1	F35D6.1	797	812	884	854	731	703	693	669	715	640	702	717	1141	1093	1167	1173
WBGene00001412	fem-2	T19C3.8	707	744	1439	1458	513	492	606	624	759	740	657	613	1098	1097	1174	1207
WBGene00001413	fem-3	C01F6.4	247	297	745	776	94	80	64	73	69	96	76	77	850	963	1026	1078
WBGene00001414	fer-1	F43G9.6	527	405	58	60	449	501	506	528	515	494	449	522	19	29	35	32
WBGene00001423	fib-1	T01C3.7	12614	12898	12027	11909	8627	8431	10238	10322	10734	10954	9470	9530	1028	1085	1052	1195
WBGene00001425	fis-2	F13B9.8	135	145	170	194	193	192	270	272	374	339	436	378	236	208	232	235
WBGene00001426	fkb-1	F36H1.1	1172	1102	1143	1171	1528	1553	1317	1255	1139	1068	1245	1154	572	581	592	614
WBGene00001427	fkb-2	Y18D10A.19	2458	2361	2658	2662	2264	2245	3037	2920	3254	3592	2965	2927	360	393	385	420
WBGene00001428	fkb-3	C05C8.3	831	251	288	282	2590	2651	4077	4175	3799	3544	3504	3355	301	351	279	274
WBGene00001429	fkb-4	ZC455.10	382	103	18	15	540	565	506	530	302	294	455	448	36	115	44	41
WBGene00001430	fkb-5	C50F2.6	441	262	448	410	7891	7350	4411	4476	5050	4592	5059	4083	363	437	304	313
WBGene00001431	fkb-6	F31D4.3	2806	2894	3021	3062	2441	2400	3624	3497	3883	3844	3394	3421	1123	1180	1190	1323
WBGene00001432	fkb-7	B0511.1	4	5	13	8	250	239	197	190	170	200	212	181	107	149	80	78
WBGene00001433	fkb-8	Y18D10A.25	64	64	46	41	67	76	72	63	85	84	63	88	93	76	64	64
WBGene00001438	fkh-6	B0286.5	98	76	26	27	98	93	53	51	34	42	60	47	93	56	82	74
WBGene00001439	fkh-7	F26D12.1	141	120	83	96	193	195	233	195	231	287	558	1147	375	389	345	326
WBGene00001440	fkh-8	F40H3.4	14	11	11	12	14	17	4	6	5	4	11	12	21	45	26	21
WBGene00001441	fkh-9	K03C7.2	739	567	209	213	360	386	378	330	348	406	459	587	632	657	583	553
WBGene00001443	fli-1	B0523.5	849	891	1065	1129	747	680	709	664	780	704	1134	1095	2203	2198	2254	2308
WBGene00001444	flp-1	F23B2.5	251	189	174	180	316	323	545	564	836	879	537	544	187	228	184	186
WBGene00001445	flp-2	W07E11.3	38	33	25	26	46	47	51	48	77	70	55	52	52	67	48	39
WBGene00001446	flp-3	W07E11.2	103	77	77	67	118	125	185	170	268	255	195	182	126	143	122	112
WBGene00001447	flp-4	C18D1.3	46	45	29	32	63	55	41	33	34	32	27	34	71	87	79	63
WBGene00001448	flp-5	C03G5.7	102	77	61	54	125	123	120	127	146	112	125	125	107	130	113	99
WBGene00001449	flp-6	F07D3.2	201	195	167	173	228	211	101	99	57	40	104	121	249	272	242	253
WBGene00001450	flp-7	F49E10.3	45	42	31	33	70	59	26	28	22	23	43	42	118	149	130	122
WBGene00001451	flp-8	F31F6.4	93	91	90	77	172	186	219	224	318	298	203	195	157	192	173	183
WBGene00001452	flp-9	C36H8.3	258	218	163	177	269	298	172	163	162	145	188	182	180	229	207	186
WBGene00001453	flp-10	T06C10.4	144	140	96	79	152	153	75	73	70	78	78	83	142	132	140	134
WBGene00001454	flp-11	K02G10.4	163	148	105	105	209	208	284	275	329	327	237	275	133	147	112	98
WBGene00001455	flp-12	C05E11.8	119	101	67	65	124	123	171	176	219	202	159	158	112	115	122	104
WBGene00001456	flp-13	F33D4.3	99	79	51	55	106	112	116	116	137	143	109	119	105	119	81	80
WBGene00001457	flp-14	Y37D8A.15	168	157	147	148	228	222	212	207	249	212	204	197	180	184	179	168
WBGene00001458	flp-15	ZK525.1	56	45	35	36	68	68	71	56	75	61	84	77	73	105	89	75
WBGene00001459	flp-16	F15D4.8	97	84	73	68	135	119	61	47	55	53	65	73	138	183	166	130
WBGene00001460	flp-17	C52D10.11	114	115	87	84	135	142	80	69	75	51	78	81	146	192	151	142
WBGene00001461	flp-18	Y48D7A.2	176	150	148	131	276	243	173	174	184	155	191	215	186	241	211	193
WBGene00001462	flp-19	M79.4	64	62	50	54	87	99	72	72	90	74	71	88	104	135	117	94
WBGene00001463	flp-20	E01H11.3	33	28	22	21	38	37	24	20	16	12	19	30	66	77	77	57
WBGene00001464	flp-21	C26F1.10	30	21	15	17	44	42	58	40	66	70	52	42	52	69	57	49
WBGene00001465	flr-1	F02D10.5	143	125	86	81	134	119	81	92	94	89	93	80	205	145	154	128
WBGene00001466	flr-2	F58H1.4	58	33	22	20	45	42	19	19	17	18	17	24	55	62	62	55
WBGene00001468	flr-4	F09B12.6	82	94	34	35	95	78	41	48	28	24	40	39	132	97	92	75
WBGene00001470	baz-2	ZK783.4	84	112	398	447	219	234	99	123	113	118	198	157	1433	1329	1378	1357
WBGene00001475	fmi-1	F15B9.7	77	53	35	32	116	132	62	65	78	84	93	89	238	729	310	295
WBGene00001476	fmo-1	K08C7.2	248	136	203	254	189	198	105	114	93	104	83	90	131	235	158	121
WBGene00001478	fmo-3	Y39A1A.19	126	245	167	183	395	390	644	609	693	693	521	562	296	205	200	213
WBGene00001479	fmo-4	F53F4.5	699	531	569	606	1012	942	1435	1382	1314	1232	1329	1473	493	444	396	387
WBGene00001480	fmo-5	H24K24.5	159	145	146	137	206	222	208	189	178	160	176	179	236	151	187	169
WBGene00001481	fog-1	Y54E10A.4	72	86	159	155	170	161	235	244	275	274	280	282	543	832	952	1108
WBGene00001482	fog-2	Y113G7B.5	201	212	445	452	79	86	99	121	108	136	99	117	531	520	576	556
WBGene00001483	fog-3	C03C11.2	36	22	15	12	201	207	336	296	366	376	333	364	24	167	266	298
WBGene00001484	fox-1	T07D1.4	56	67	131	134	124	115	57	60	55	64	78	70	370	334	326	329
WBGene00001485	fre-1	Y113G7A.8	331	331	561	561	309	323	352	327	367	352	321	324	783	743	865	847
WBGene00001486	frh-1	F59G1.7	117	130	185	193	82	77	108	113	89	110	102	89	256	244	266	259
WBGene00001488	frm-1	ZK270.2	3599	3407	1762	1901	2580	2411	2726	2404	2899	2756	2440	2370	2509	2509	2278	2559
WBGene00001489	frm-2	T04C9.6	388	265	196	205	402	406	361	353	344	362	348	345	422	494	416	367
WBGene00001490	frm-3	H05G16.1	190	134	78	82	251	251	135	146	155	132	184	171	173	348	191	198
WBGene00001491	frm-4	C24A11.8	894	787	736	730	670	651	610	532	554	549	577	569	1326	1401	1454	1497
WBGene00001492	frm-5.1	Y38C1AB.8	64	61	64	66	122	124	104	100	102	88	103	80	119	105	102	109
WBGene00001493	frm-7	C51F7.1	825	811	568	667	508	494	1467	1212	1914	1743	1901	2069	1401	1356	1333	1312
WBGene00001494	frm-8	H09G03.2	121	119	78	82	133	147	82	87	100	90	85	79	181	254	232	201
WBGene00001495	frm-9	F31B12.3	95	86	56	60	41	46	40	34	43	48	26	41	136	155	116	96
WBGene00001496	frm-10	F25H9.5	508	587	720	716	307	324	280	245	234	248	947	1378	959	1000	1072	1094
WBGene00001497	fars-1	T08B2.9	1993	2025	2387	2308	2125	2039	2267	2225	2399	2300	2239	2249	1180	1199	1222	1307
WBGene00001498	fars-3	F22B5.9	2139	2223	2315	2237	2161	2101	2466	2357	2858	2751	2547	2502	1261	1238	1232	1364
WBGene00001499	fsn-1	C26E6.5	513	597	1317	1372	225	226	210	225	223	240	253	237	881	921	957	1029
WBGene00001500	ftn-1	C54F6.14	16	3	19	19	71	64	65	56	51	55	59	68	10	16	9	12
WBGene00001501	ftn-2	D1037.3	1812	1432	2798	2827	5040	4734	4011	3875	2785	2759	4039	3687	434	477	455	479
WBGene00001502	ftt-2	F52D10.3	4517	3701	2927	2969	5491	5304	4711	4289	3583	3342	4668	4442	801	894	842	905
WBGene00001503	fum-1	H14A12.2	3033	3253	2992	3001	3370	3347	3630	3540	3888	3596	3466	3414	1162	1206	1246	1354
WBGene00001505	fut-1	K08F8.3	282	247	135	143	197	196	78	102	65	76	67	74	273	243	254	219
WBGene00001506	fut-2	EGAP9.2	57	16	4	3	80	85	44	43	33	40	32	43	8	27	9	6
WBGene00001508	fut-8	C10F3.6	383	288	182	152	332	305	90	95	72	76	98	88	312	291	252	225
WBGene00001509	fzo-1	ZK1248.14	769	817	1101	1119	697	682	744	821	869	892	795	692	1328	1333	1390	1457
WBGene00001510	fzr-1	ZK1307.6	576	511	417	462	362	333	618	548	746	592	716	612	1387	1340	1404	1478
WBGene00001511	fzy-1	ZK177.6	809	974	1686	1826	349	366	352	407	377	412	361	381	1254	1314	1371	1433
WBGene00001512	gab-1	ZC482.1	12	11	6	9	21	21	10	8	12	18	20	16	16	37	24	20
WBGene00001513	gad-1	T05H4.14	551	600	1075	1154	429	483	431	426	419	422	396	390	1165	1167	1252	1320
WBGene00001514	xnd-1	C05D2.5	677	792	1102	1193	339	380	537	538	629	621	624	639	1374	1385	1423	1500
WBGene00001515	gap-1	T24C12.2	97	65	46	34	71	67	32	25	22	20	39	52	110	144	105	107
WBGene00001516	gap-2	ZK899.8	455	314	392	415	561	573	641	582	633	584	450	430	1043	1056	1004	987
WBGene00001517	gar-1	C15B12.5	47	32	23	23	62	58	18	19	14	16	31	44	39	74	50	36
WBGene00001518	gar-2	F47D12.1	71	91	52	50	95	91	12	11	12	10	24	20	99	168	114	96
WBGene00001519	gar-3	Y40H4A.1	82	81	46	42	88	94	28	33	27	20	74	64	70	114	76	57
WBGene00001520	gas-1	K09A9.5	1800	1893	1493	1421	2488	2410	3266	3097	3632	3525	2861	2720	872	840	903	898
WBGene00001522	gbh-1	D2089.5	92	76	124	133	225	221	198	191	138	120	177	155	327	252	278	257
WBGene00001523	gbh-2	M05D6.7	73	97	106	119	156	136	136	138	102	126	105	107	162	168	129	92
WBGene00001526	gck-1	T19A5.2	1023	809	658	726	771	738	662	657	636	602	772	780	1401	1430	1425	1490
WBGene00001527	gcs-1	F37B12.2	1072	1227	1235	1231	1225	1197	1187	1145	1281	1283	1190	1186	1271	1264	1335	1396
WBGene00001535	gcy-8	C49H3.1	14	13	4	7	13	25	13	15	23	18	19	14	22	78	36	31
WBGene00001536	gcy-9	ZK455.2	25	19	17	23	11	7	5	4	3	6	16	14	47	37	33	27
WBGene00001537	gcy-11	C30G4.3	58	58	50	47	91	98	110	106	136	126	134	139	103	131	89	74
WBGene00001538	gcy-12	F08B1.2	1437	1292	617	651	751	735	338	336	330	304	363	386	1326	1228	1156	1217
WBGene00001541	gcy-15	ZC239.7	26	23	16	21	31	26	23	25	28	30	25	19	33	53	51	33
WBGene00001543	gcy-18	ZK896.8	21	23	12	16	27	29	29	35	26	29	21	33	56	106	68	59
WBGene00001544	gcy-19	C17F4.6	9	10	20	10	9	6	10	10	10	11	24	19	28	52	34	36
WBGene00001546	gcy-21	F22E5.3	45	30	34	26	55	49	29	32	48	47	29	30	54	50	40	31
WBGene00001547	gcy-22	T03D8.5	19	9	7	7	112	130	224	239	426	532	276	278	15	30	15	13
WBGene00001548	gcy-23	T26C12.4	16	10	8	9	16	14	14	23	36	31	16	18	41	63	43	31
WBGene00001555	gcy-35	T04D3.4	21	22	7	14	24	20	16	23	20	24	18	15	39	68	54	35
WBGene00001557	gcy-37	C54E4.3	14	11	3	8	17	17	14	9	15	18	21	21	14	33	16	12
WBGene00001558	gdi-1	Y57G11C.10	3682	3324	3652	3613	4812	4721	5548	4935	5366	4714	5290	5287	1277	1374	1373	1512
WBGene00001559	gei-1	F45H7.2	702	468	240	228	792	746	394	346	318	272	433	394	612	711	528	526
WBGene00001560	gei-3	T22H6.6	1515	1159	616	607	699	705	689	617	803	786	668	679	1161	852	911	917
WBGene00001561	gei-4	W07B3.2	897	851	984	982	852	799	1231	1137	1027	1000	810	797	1089	1153	1147	1196
WBGene00001562	lin-66	B0513.1	471	482	617	658	548	562	724	596	842	664	1015	737	1508	1423	1316	1435
WBGene00001563	gei-6	C05C8.4	778	854	1093	1186	570	621	784	751	997	744	972	775	1741	1749	1801	1890
WBGene00001564	icl-1	C05E4.9	3503	3911	1173	1294	2929	2983	7494	6526	6834	6266	5307	6255	1734	878	1950	1922
WBGene00001565	gei-8	C14B9.6	547	487	440	523	534	499	435	401	421	422	437	419	1638	1532	1478	1524
WBGene00001566	acdh-13	C28C12.9	654	695	809	789	648	660	359	370	333	348	364	340	961	917	953	969
WBGene00001568	snpc-4	F32H2.1	1014	1102	1428	1432	774	803	670	685	675	710	777	711	1519	1544	1644	1646
WBGene00001569	meg-3	F52D2.4	42	110	569	601	14	10	14	12	19	42	8	6	1404	1315	1374	1419
WBGene00001570	gei-13	F58A4.11	175	99	55	47	1023	982	906	703	1162	664	1446	923	230	632	276	264
WBGene00001571	gei-14	K01C8.5	483	516	1034	984	204	202	118	118	140	155	125	138	1265	1257	1344	1369
WBGene00001572	gei-15	M03A8.4	440	427	220	239	472	446	691	644	895	832	723	690	230	289	231	214
WBGene00001574	gei-17	W10D5.3	839	900	1169	1172	658	685	747	733	777	754	861	950	1618	1646	1685	1735
WBGene00001575	gei-18	Y37A1B.15	12	7	9	10	41	41	43	44	45	54	36	28	23	23	18	18
WBGene00001577	gem-4	T12A7.1	60	58	38	40	11	23	13	7	13	19	134	234	240	268	249	218
WBGene00001578	ges-1	R12A1.4	581	414	309	318	784	792	369	381	324	317	304	312	452	375	430	429
WBGene00001579	gex-2	F56A11.1	477	419	686	703	620	624	375	378	320	304	352	348	1657	1498	1486	1536
WBGene00001580	gex-3	F28D1.10	623	646	1093	1078	469	476	302	263	278	277	379	319	1827	1772	1837	1852
WBGene00001581	gfi-1	F57F4.3	1759	1580	623	756	1914	1897	915	776	1113	1070	969	869	727	733	641	721
WBGene00001582	gfi-2	K02A11.1	1281	1109	1546	1626	861	828	854	822	910	851	981	1105	1356	1411	1492	1547
WBGene00001583	gfi-3	M163.4	80	86	188	195	103	118	107	99	118	90	108	100	649	594	631	487
WBGene00001584	nrde-4	F45E4.10	890	888	1405	1398	574	599	436	472	463	429	448	448	1399	1429	1543	1583
WBGene00001585	gfl-1	M04B2.3	168	190	431	450	122	115	91	90	93	88	113	100	364	376	414	407
WBGene00001586	ggr-1	C09G5.1	7	13	10	7	18	18	3	3	4	3	7	10	14	38	20	14
WBGene00001587	ggr-2	C45B2.4	22	16	15	12	31	36	18	16	20	19	26	22	19	41	19	23
WBGene00001588	ggr-3	F09C12.1	27	24	16	19	20	26	7	7	8	8	14	15	24	54	32	25
WBGene00001589	gip-1	H04J21.3	502	531	697	706	512	523	444	481	495	466	499	479	1239	1195	1217	1222
WBGene00001590		C45G3.3	120	113	228	216	133	122	128	112	111	112	119	114	347	287	319	320
WBGene00001591	glc-1	F11A5.10	119	89	79	91	148	154	32	36	24	25	29	24	394	310	349	325
WBGene00001592	glc-2	F25F8.2	88	144	138	138	69	61	46	35	37	32	60	51	186	152	142	130
WBGene00001593	glc-3	ZC317.3	9	11	3	7	13	9	1	3	2	2	2	6	11	37	16	14
WBGene00001594	glc-4	C27H5.8	56	51	45	42	64	60	14	15	11	11	30	22	107	143	98	106
WBGene00001595	gld-1	T23G11.3	5430	6079	8172	8623	1687	1727	1804	1844	2073	2450	1745	1850	1822	1973	1963	2188
WBGene00001596	gld-2	ZC308.1	1936	1873	1913	2144	1125	1136	1043	976	1097	1066	1171	1341	2918	2971	2968	3166
WBGene00001597	gld-3	T07F8.3	1004	1249	2899	3020	400	410	457	441	472	550	481	495	2616	2755	2828	3011
WBGene00001598	glh-1	T21G5.3	10450	10099	9253	9124	7383	7504	5326	5215	4504	4584	4733	5154	1901	1919	1948	2165
WBGene00001599	glh-2	C55B7.1	1310	1478	2586	2761	363	339	386	389	417	438	385	429	2024	2031	2095	2214
WBGene00001600	glh-3	B0414.6	426	453	735	737	202	211	227	237	254	272	260	264	1175	1103	1214	1193
WBGene00001601	glh-4	T12F5.3	1068	1134	1437	1383	739	750	983	953	1126	1039	936	944	1342	1300	1346	1392
WBGene00001602	gln-1	C45B2.5	278	342	302	275	227	248	266	262	278	293	286	239	401	321	345	347
WBGene00001603	gln-2	K03H1.1	892	906	312	262	83	96	79	119	47	60	62	70	11	3	7	5
WBGene00001604	gln-3	Y105C5B.28	1890	1655	2420	2284	4482	4106	6185	5714	5484	5396	5443	5372	666	595	693	619
WBGene00001606	gln-5	F26D10.10	376	553	2070	2186	83	83	93	85	109	151	76	73	975	1046	1078	1171
WBGene00001607	gln-6	C28D4.3	1145	1509	5399	5415	131	133	72	90	92	232	75	74	1163	1285	1285	1424
WBGene00001608		R07B1.8	68	56	12	11	8	9	14	15	14	16	13	18	10	22	11	13
WBGene00001609	glp-1	F02A9.6	1042	1206	1834	2002	639	639	789	779	958	974	928	890	2640	2729	2895	2995
WBGene00001612	glr-1	C06E1.4	24	17	13	9	40	37	8	9	9	4	14	16	38	97	49	48
WBGene00001613	glr-2	B0280.12	39	21	16	12	32	38	30	25	23	34	29	24	50	82	43	32
WBGene00001615	glr-4	C06A8.9	87	102	59	61	93	79	35	36	43	55	78	80	114	188	116	110
WBGene00001616	glr-5	ZC196.7	81	76	54	43	79	90	16	14	10	3	16	21	95	175	103	85
WBGene00001617	glr-6	F41B4.4	83	72	79	88	113	116	80	100	106	114	135	184	203	192	152	146
WBGene00001620	glt-1	C12D12.2	1001	1050	1186	1140	1620	1635	565	488	434	442	557	514	853	900	805	823
WBGene00001621	glt-3	K08F4.4	115	91	76	61	128	141	184	188	286	270	188	198	140	165	176	116
WBGene00001622	glt-4	T22E5.2	138	153	105	106	145	142	103	87	116	106	113	119	218	236	215	186
WBGene00001623	glt-5	Y53C12A.2	176	90	31	28	69	80	53	56	67	59	47	40	106	87	110	77
WBGene00001624	glt-6	R05G6.6	105	79	47	40	87	77	112	102	195	172	116	114	93	100	101	69
WBGene00001625	glt-7	W03G1.1	23	21	13	13	24	27	42	41	54	56	42	37	38	40	33	26
WBGene00001627	gly-2	C55B7.2	272	294	159	142	114	106	43	46	51	46	74	67	303	233	273	227
WBGene00001628	gly-3	ZK688.8	990	905	1086	1166	1302	1329	1196	1123	1136	1104	1133	1153	1243	1264	1319	1380
WBGene00001629	gly-4	Y116F11B.12	828	967	505	480	826	766	549	505	559	500	541	506	753	725	738	782
WBGene00001630	gly-5	Y39E4B.12	1237	1054	822	867	1455	1386	896	831	886	872	915	970	1223	1241	1254	1304
WBGene00001631	gly-6	H38K22.5	285	381	428	411	1505	1426	1493	1325	504	454	1394	1203	577	627	530	455
WBGene00001632	gly-7	Y46H3A.6	1082	962	1397	1384	1781	1745	2445	2334	2916	2758	2382	2269	1241	1288	1366	1417
WBGene00001633	gly-8	Y66A7A.6	1129	561	469	452	5041	4865	13180	12520	14525	13856	10783	11593	445	391	299	331
WBGene00001635	gly-10	Y45F10D.3	1063	1030	1360	1303	1079	1053	495	514	447	440	571	519	1153	1132	1195	1247
WBGene00001636	gly-11	Y75B8A.9	70	80	102	83	644	612	639	614	702	626	618	675	238	250	226	214
WBGene00001637	gly-12	F48E3.1	130	88	77	82	265	247	70	57	40	42	88	103	276	214	191	195
WBGene00001638	gly-13	B0416.6	335	363	286	286	301	305	128	132	116	99	199	207	521	477	461	467
WBGene00001639	gly-14	M01F1.1	34	31	16	19	14	14	34	34	29	24	32	27	80	83	123	126
WBGene00001644	gly-19	F22D6.12	101	71	72	58	125	137	46	55	38	41	36	38	152	135	131	114
WBGene00001645	gly-20	C03E10.4	650	715	1163	1176	561	544	242	267	223	218	278	284	1131	1192	1313	1341
WBGene00001646	gna-1	B0024.12	57	42	38	40	132	116	166	175	179	170	146	162	72	69	60	61
WBGene00001647	gna-2	T23G11.2	349	465	1430	1443	73	81	96	94	79	119	73	68	853	862	920	969
WBGene00001648	goa-1	C26C6.2	1217	1205	1272	1336	1337	1255	848	710	828	793	796	775	1262	1352	1361	1449
WBGene00001649	gob-1	H13N06.3	557	558	550	547	774	732	791	737	743	736	778	952	709	597	693	670
WBGene00001650	gon-1	F25H8.3	778	533	289	278	1047	916	736	693	829	826	662	673	1001	1075	867	874
WBGene00001651	gon-2	T01H8.5	817	947	613	648	1018	1040	587	559	567	546	560	494	1802	1501	1458	1472
WBGene00001653	gon-4	K04D7.5	429	497	1018	1078	284	251	209	259	252	288	255	265	2102	2094	2250	2297
WBGene00001660	gop-1	C34E10.3	371	336	345	365	323	303	236	219	249	222	297	264	1000	918	985	946
WBGene00001661	gop-2	C34E10.2	527	541	830	800	350	325	380	416	390	458	371	370	687	721	745	757
WBGene00001662	gop-3	C34E10.1	906	948	1092	1101	971	906	1124	1094	1259	1296	1100	1061	831	818	895	885
WBGene00001663	gpa-1	T19C4.6	26	22	26	24	25	24	26	21	23	24	25	24	49	26	38	28
WBGene00001664	gpa-2	F38E1.5	15	14	6	9	15	15	7	7	4	6	18	16	15	50	24	21
WBGene00001665	gpa-3	E02C12.5	13	17	8	10	18	16	10	7	8	12	30	39	22	58	35	24
WBGene00001669	gpa-7	R10H10.5	70	80	68	54	89	83	57	57	35	45	68	76	137	202	141	114
WBGene00001674	gpa-12	F18G5.3	149	143	105	103	89	86	71	69	74	71	69	74	146	136	127	111
WBGene00001677	gpa-15	M04C7.1	9	9	8	8	7	8	5	10	6	8	10	8	21	25	15	11
WBGene00001678	gpa-16	Y95B8A.5	329	333	423	455	297	273	327	293	339	363	304	315	730	740	773	810
WBGene00001679	gpb-1	F13D12.7	2554	2352	2027	2092	3231	3189	2448	2107	2469	2302	2360	2216	1459	1564	1491	1631
WBGene00001680	gpb-2	F52A8.2	314	251	179	185	334	351	199	180	162	149	181	175	334	386	317	292
WBGene00001681	gpc-1	K02A4.2	13	11	6	7	24	15	3	2	1	2	6	6	20	61	34	22
WBGene00001682	gpc-2	F08B6.2	567	494	544	560	522	551	616	610	575	579	520	559	197	218	217	230
WBGene00001683	gpd-1	T09F3.3	593	738	1648	1712	126	121	209	201	216	244	159	204	442	481	500	547
WBGene00001684	gpd-2	K10B3.8	1574	2035	2192	2127	3245	3033	4426	3966	4652	4728	4022	3871	634	621	673	720
WBGene00001685	gpd-3	K10B3.7	1874	2205	2314	2319	3137	3087	4707	4455	5502	5492	4555	4464	674	655	710	771
WBGene00001686	gpd-4	F33H1.2	384	460	1058	1091	105	118	110	116	114	156	103	122	419	418	451	495
WBGene00001687	gpn-1	F59D12.4	39	65	16	15	120	104	46	51	36	42	51	51	66	55	85	69
WBGene00001688	gpr-1	F22B7.13	117	128	153	171	133	126	103	109	106	99	109	110	450	403	442	421
WBGene00001689	gpr-2	C38C10.4	311	271	300	284	211	212	191	199	167	173	177	176	503	487	529	508
WBGene00001690	grd-1	R08B4.1	76	24	38	40	1746	1838	1265	1129	942	916	1115	1051	78	131	42	42
WBGene00001691	grd-2	F46B3.5	58	7	0	0	607	692	785	800	579	456	609	650	3	46	11	11
WBGene00001692	grd-3	W05E7.1	145	556	1550	1513	364	273	334	333	686	818	452	387	374	302	310	322
WBGene00001694	grd-5	F41E6.2	3328	2013	1159	1124	1153	1271	2115	2039	1714	1704	1367	1523	282	254	244	257
WBGene00001695	grd-6	T18H9.1	4014	1774	2	2	17	108	42	46	32	70	14	54	5	65	13	10
WBGene00001699	grd-10	F09D12.1	68	242	387	361	226	221	135	138	253	306	200	156	65	144	88	78
WBGene00001700	grd-11	K02E2.2	24	4	1	4	21	26	9	8	3	5	5	5	10	28	13	12
WBGene00001702	grd-13	W05E7.3	22	63	126	123	76	92	49	58	79	104	79	74	67	165	96	83
WBGene00001703	grd-14	T01B10.2	3996	2099	124	123	95	255	244	316	183	346	85	193	149	153	96	97
WBGene00001704	grd-15	Y87G2A.15	48	28	0	0	6	8	13	17	13	14	12	10	4	9	4	2
WBGene00001707	grh-1	Y48G8AR.1	87	48	33	26	557	538	1671	1400	1669	1189	1601	1178	90	245	100	94
WBGene00001708	grk-1	F19C6.1	275	255	271	286	339	312	192	196	172	176	231	218	893	884	837	870
WBGene00001709	grk-2	W02B3.2	162	138	116	126	170	185	61	58	44	44	71	61	369	363	326	293
WBGene00001713	grl-4	F42C5.7	1902	1393	240	243	29	88	85	91	101	216	147	152	248	237	194	205
WBGene00001714	grl-5	Y47D7A.5	93	27	3	1	1834	2021	3292	3147	1855	1725	1959	2392	13	110	32	33
WBGene00001716	grl-7	T02E9.2	72	39	1	1	3621	3887	7097	6456	6144	5538	4999	5214	26	253	75	68
WBGene00001719	grl-10	C26F1.5	26	20	16	20	475	515	530	447	423	230	686	365	53	98	62	55
WBGene00001724	grl-15	Y75B8A.20	20	16	3	5	1588	1727	2969	2836	2698	2556	2036	2250	19	140	48	43
WBGene00001725	grl-16	Y65B4BR.6	12726	3421	8	19	1587	2221	3805	3769	1772	1804	1360	1929	26	228	58	53
WBGene00001730	grl-21	ZC168.5	687	1130	1	1	9	35	7	17	2	14	14	29	3	80	16	22
WBGene00001731	grl-22	W03A5.3	50	12	10	11	12	10	28	26	30	41	14	26	39	31	34	31
WBGene00001740	gro-1	ZC395.6	167	184	262	301	144	138	148	164	158	164	158	166	522	520	553	531
WBGene00001743	grp-1	K06H7.4	486	596	885	884	289	298	248	271	273	248	364	292	894	906	943	977
WBGene00001744	gars-1	T10F2.1	2399	2648	2727	2777	2649	2668	2606	2496	2640	2369	2574	2662	1638	1653	1676	1866
WBGene00001745	gsa-1	R06A10.2	195	161	68	76	300	266	315	281	388	372	268	263	212	239	164	198
WBGene00001746	gsk-3	Y18D10A.5	712	724	462	487	669	612	685	617	731	704	675	693	1089	1069	1057	1162
WBGene00001747	gsp-1	F29F11.6	1962	1809	1721	1821	1914	1946	1848	1702	1816	1790	1871	1888	1151	1220	1236	1339
WBGene00001748	gsp-2	F56C9.1	3155	3302	4166	4218	2669	2764	3680	3341	4471	4198	4010	3781	1185	1263	1291	1392
WBGene00001749	gst-1	R107.7	1179	1425	1419	1404	932	970	3431	3547	5101	5013	3159	3636	559	597	604	668
WBGene00001750	gst-2	K08F4.6	8	23	21	23	10	7	10	10	11	13	7	6	26	24	16	17
WBGene00001751	gst-3	K08F4.11	18	26	20	22	29	30	33	37	32	31	35	28	30	33	32	27
WBGene00001752	gst-4	K08F4.7	291	435	439	377	387	340	339	343	198	206	270	262	233	135	211	205
WBGene00001753	gst-5	R03D7.6	298	477	256	232	422	382	490	486	764	762	556	552	197	270	199	177
WBGene00001754	gst-6	F11G11.3	342	337	109	120	382	356	256	263	185	198	223	230	135	210	145	135
WBGene00001755	gst-7	F11G11.2	631	857	1213	1226	419	411	1442	1346	1735	1854	1107	1281	529	567	572	614
WBGene00001757	gst-9	R05F9.5	42	56	19	11	8	6	34	33	14	14	28	32	35	18	29	23
WBGene00001758	gst-10	Y45G12C.2	1185	1521	766	689	896	910	747	827	714	738	599	632	195	256	222	241
WBGene00001759	gst-11	R11G1.3	18	13	16	10	19	25	7	7	8	6	9	12	26	41	26	15
WBGene00001760	gst-12	F37B1.2	11	13	39	39	30	31	37	38	35	58	40	38	54	86	58	44
WBGene00001761	gst-13	T26C5.1	527	752	319	328	732	882	471	483	239	316	341	377	274	344	290	297
WBGene00001763	gst-15	F37B1.4	23	26	26	30	14	13	35	33	51	100	37	50	43	41	45	36
WBGene00001764	gst-16	F37B1.5	11	15	23	28	8	6	7	6	6	12	6	12	77	51	66	50
WBGene00001768	gst-20	Y48E1B.10	138	245	222	207	284	265	472	411	757	870	432	508	142	344	182	136
WBGene00001769	gst-21	ZK697.6	12	18	18	14	42	36	34	31	30	39	25	27	27	24	28	17
WBGene00001770	gst-22	F21H7.1	134	134	36	32	92	96	79	75	83	61	122	173	126	138	92	72
WBGene00001771	gst-23	T28A11.11	18	5	8	3	9	11	7	11	10	12	7	6	8	13	9	8
WBGene00001772	gst-24	F37B1.1	20	28	44	46	69	95	93	81	100	173	92	108	42	154	81	59
WBGene00001774	gst-26	Y53F4B.29	530	536	431	438	768	720	583	578	421	474	527	487	285	273	291	289
WBGene00001775	gst-27	Y53F4B.30	496	589	498	501	868	840	936	981	1058	1171	927	854	367	399	391	409
WBGene00001776	gst-28	Y53F4B.31	232	254	175	165	239	254	88	87	61	63	69	82	191	190	121	139
WBGene00001781	gst-33	C02A12.1	10	13	9	9	17	21	18	21	13	18	19	22	20	26	46	33
WBGene00001783	gst-35	Y1H11.2	19	13	15	18	18	23	50	61	49	66	31	46	27	29	26	24
WBGene00001784	gst-36	R07B1.4	795	812	637	608	877	847	2473	2448	3203	3042	2349	2612	334	326	301	312
WBGene00001786	gst-38	F35E8.8	108	305	25	24	89	87	44	39	36	35	41	44	24	226	27	27
WBGene00001787	gst-39	Y53F4B.33	118	150	91	81	147	153	117	114	95	100	122	122	112	119	99	79
WBGene00001788	gst-40	F56B3.10	21	17	9	12	19	23	80	64	248	329	67	65	16	36	29	21
WBGene00001789	gst-41	R13D7.7	10	32	55	46	20	20	7	14	14	17	10	13	67	51	58	56
WBGene00001790	gst-42	D1053.1	241	354	261	246	465	439	520	485	330	323	473	462	280	308	262	255
WBGene00001791	gst-43	Y71F9AL.5	95	75	83	83	116	128	102	121	92	100	102	103	150	101	128	89
WBGene00001793	gsy-1	Y46G5A.31	1438	1508	2493	2510	1911	1668	2181	2011	2358	2233	1947	1838	1598	1623	1638	1787
WBGene00001794	gta-1	K04D7.3	4033	4590	4887	4613	5281	5137	8061	7855	10896	10418	7782	7642	1043	1059	1138	1174
WBGene00001795	gtl-1	C05C12.3	1162	1213	470	467	605	554	427	432	676	639	623	537	1286	1106	1065	938
WBGene00001796	gtl-2	F54D1.5	53	75	68	75	73	52	61	68	78	86	74	49	203	197	161	145
WBGene00001803	lite-1	C14F11.3	27	29	19	20	37	33	45	38	61	58	54	49	65	66	60	53
WBGene00001805	gur-4	K09E4.5	15	16	13	16	43	35	51	43	54	50	24	24	19	24	20	13
WBGene00001806	gur-5	ZK622.2	5	9	9	10	2	4	11	10	11	10	8	12	17	19	16	18
WBGene00001808	gut-2	T10G3.6	245	240	432	422	181	177	179	193	145	193	176	159	212	217	229	234
WBGene00001811	haf-1	C30H6.6	37	48	70	73	59	54	52	42	53	53	38	41	308	206	274	245
WBGene00001812	haf-2	F43E2.4	787	831	949	914	604	552	741	680	814	745	1931	2393	1395	1376	1461	1540
WBGene00001813	haf-3	F57A10.3	636	637	740	782	648	607	625	627	634	618	594	588	1119	1070	1153	1167
WBGene00001814	haf-4	W04C9.1	1136	1065	490	428	2999	2671	1625	1571	1671	1553	1629	1573	631	695	587	607
WBGene00001815	hmt-1	W09D6.6	818	728	788	805	837	787	633	601	635	625	580	582	1129	1074	1176	1211
WBGene00001816	haf-6	Y48G8AL.11	431	411	531	494	608	553	351	357	277	302	265	258	708	570	656	614
WBGene00001817	haf-7	Y50E8A.16	410	617	121	126	223	228	157	144	138	126	205	220	440	403	326	317
WBGene00001819	haf-9	ZK484.2	1912	1579	610	572	3536	3316	2261	2234	2070	2035	2152	2040	796	941	842	849
WBGene00001820	ham-1	F53B2.6	11	5	8	14	16	21	6	8	7	12	16	21	60	151	53	66
WBGene00001821	ham-2	C07A12.1	34	31	27	27	18	19	8	10	7	10	12	11	114	160	103	103
WBGene00001823	hap-1	ZC395.7	224	212	273	269	197	209	270	286	303	305	233	260	264	261	273	283
WBGene00001824	hbl-1	F13D11.2	57	57	63	56	141	151	145	136	212	174	174	168	476	991	503	493
WBGene00001827	hcf-1	C46A5.9	1446	1679	2677	2811	1095	1066	959	941	1040	1040	1188	1135	1935	1978	2065	2195
WBGene00001829	hcp-1	ZK1055.1	1755	1990	2664	2954	804	740	365	382	311	421	327	322	3140	3331	3404	3641
WBGene00001830	hcp-2	T06E4.1	1941	2045	2052	2153	808	849	619	652	529	566	574	583	2468	2402	2594	2643
WBGene00001831	hcp-3	F58A4.3	445	491	943	967	232	221	293	296	300	354	215	246	649	681	694	733
WBGene00001832	hcp-4	T03F1.9	1156	1212	1727	1852	651	695	528	554	608	545	567	563	1701	1729	1845	1892
WBGene00001833	hcp-6	Y110A7A.1	727	843	1224	1391	589	595	529	510	572	624	573	575	2613	2513	2611	2624
WBGene00001834	hda-1	C53A5.3	818	926	1564	1592	741	694	536	526	573	462	661	520	1278	1373	1420	1536
WBGene00001835	hda-2	C08B11.2	210	251	480	505	163	153	121	120	126	138	140	124	783	756	861	852
WBGene00001836	hda-3	R06C1.1	430	440	866	888	264	266	363	345	377	336	376	359	938	986	1012	1047
WBGene00001837	hda-4	C10E2.3	380	324	288	296	379	375	356	315	383	354	412	391	775	816	778	775
WBGene00001838	hda-10	Y51H1A.5	196	197	322	323	185	179	190	201	187	221	183	182	581	601	658	653
WBGene00001839	hdl-1	ZK829.2	223	230	74	67	6	15	8	16	12	16	30	25	16	13	15	16
WBGene00001840	hel-1	C26D10.2	5244	5173	6544	6485	4740	4656	5274	5335	5693	5684	5239	5213	1305	1380	1391	1519
WBGene00001843	hgo-1	W06D4.1	830	785	941	927	1029	995	1064	1078	1186	1137	1072	1070	708	684	735	726
WBGene00001844	hid-1	K02E10.2	307	271	225	242	345	349	164	156	154	158	176	169	567	499	450	453
WBGene00001851	hif-1	F38A6.3	2011	1988	1667	1656	2522	2427	1463	1328	925	860	1585	1449	1450	1470	1458	1486
WBGene00001852	hil-1	C30G7.1	20	40	58	58	9	7	10	8	8	2	5	6	90	63	108	79
WBGene00001853	hil-2	Y73B6BL.9	438	429	407	431	699	759	534	488	490	468	491	533	377	392	384	431
WBGene00001854	hil-3	F22F1.1	52	47	53	44	248	290	597	545	1054	982	680	819	171	301	174	223
WBGene00001855	hil-4	C18G1.5	1298	1397	2190	2406	828	865	973	967	1017	1126	934	1013	658	710	717	801
WBGene00001856	hil-5	B0414.3	1772	1912	2177	2249	1315	1349	2075	1943	2344	2172	1850	1810	629	672	709	776
WBGene00001859	hil-8	T05E8.2	15	19	14	16	14	14	9	13	10	10	12	12	53	53	38	27
WBGene00001860	him-1	F28B3.7	1864	1972	2625	2791	1327	1405	1082	1074	1157	1090	1113	1110	2619	2683	2774	2930
WBGene00001862	him-3	ZK381.1	1017	956	1202	1254	620	660	931	979	1004	996	863	969	690	694	741	768
WBGene00001863	him-4	F15G9.4	2636	2812	1658	1732	2963	2791	4484	4135	6620	6026	5153	4721	919	856	713	841
WBGene00001864	him-5	D1086.4	113	102	223	218	57	49	66	74	75	87	64	59	291	289	327	305
WBGene00001865	him-6	T04A11.6	529	578	746	772	331	326	407	405	462	476	413	420	1397	1382	1488	1512
WBGene00001867	him-8	T07G12.12	262	288	585	625	125	126	128	115	110	148	118	119	671	687	747	712
WBGene00001869	him-10	R12B2.4	442	485	1006	1014	268	280	269	296	295	282	297	290	957	972	1051	1061
WBGene00001872	him-14	ZK1127.11	232	290	444	445	134	134	153	162	151	153	158	171	946	808	982	909
WBGene00001874	him-17	T09E8.2	1029	1121	1688	1755	728	757	683	714	837	735	781	724	1871	1900	1971	2090
WBGene00001898	his-24	M163.3	122	102	85	95	410	420	1524	1283	1960	1844	1656	2030	200	357	205	256
WBGene00001909	his-35	C50F4.13	583	513	534	506	1145	1065	2945	2869	3322	3364	2472	2549	261	276	271	265
WBGene00001910		C50F4.6	35	31	112	104	40	49	1355	1305	2454	2297	1164	997	180	132	145	158
WBGene00001911	his-37	C50F4.7	706	571	547	520	987	915	2277	2120	3623	3174	2202	2069	215	198	218	237
WBGene00001912	his-38	K03A1.6	21	55	56	54	10	7	724	664	1978	2195	542	687	69	43	68	31
WBGene00001914	his-40	K03A1.1	8	18	22	23	10	9	76	68	125	196	61	108	38	16	22	15
WBGene00001915	his-41	C50F4.5	366	332	355	340	813	830	8718	7891	17110	15849	8333	7866	158	172	153	166
WBGene00001933	his-59	F55G1.2	24	18	19	23	37	39	119	103	97	112	104	124	87	91	95	96
WBGene00001934	his-60	F55G1.11	40	30	52	66	53	64	139	135	132	130	115	132	115	106	111	108
WBGene00001935	his-61	F55G1.10	14	14	17	13	23	23	135	113	182	160	118	116	87	75	61	49
WBGene00001936	his-62	F55G1.3	13	17	20	15	18	20	73	70	115	95	84	89	86	90	90	88
WBGene00001938	his-64	F22B3.1	6	5	7	10	2	2	4	4	11	12	5	7	25	24	28	17
WBGene00001941	his-67	T23D8.5	8	12	38	30	5	3	42	34	166	209	54	61	92	78	82	65
WBGene00001942	his-68	T23D8.6	60	76	110	109	34	26	100	89	195	258	83	101	207	211	203	205
WBGene00001945	his-71	F45E1.6	482	409	206	211	685	674	708	685	656	634	599	595	167	180	174	157
WBGene00001946	his-72	Y49E10.6	976	958	1229	1278	962	1025	1338	1208	1378	1352	1556	1698	429	471	462	504
WBGene00001948	hlh-1	B0304.1	48	31	25	19	55	63	61	54	48	37	35	30	34	75	35	35
WBGene00001949	hlh-2	M05B5.5	15	26	118	144	19	18	14	12	12	20	18	11	551	569	510	555
WBGene00001955	hlh-11	F58A4.7	518	467	308	303	461	477	560	478	513	503	605	613	629	645	620	587
WBGene00001963	btb-1	F40G9.4	9	14	12	19	6	4	11	13	18	22	13	13	81	77	91	92
WBGene00001971	hmg-1.1	Y48B6A.14	3073	3194	3245	3342	2731	2702	2580	2437	2319	2346	2592	2581	510	564	547	615
WBGene00001972	hmg-1.2	F47D12.4	782	822	1069	1058	793	778	1022	955	1030	958	879	843	776	820	807	841
WBGene00001973	hmg-3	C32F10.5	1504	1587	2414	2520	983	917	1110	1179	1203	1128	1238	1250	1498	1567	1634	1730
WBGene00001974	hmg-4	T20B12.8	725	786	1593	1702	662	637	751	784	971	1004	790	796	169	181	186	193
WBGene00001975	hmg-5	F45E4.9	433	450	769	795	275	223	300	316	338	326	303	311	506	523	552	575
WBGene00001976	hmg-11	T05A7.4	126	107	116	100	412	357	254	238	181	180	266	245	110	186	115	121
WBGene00001977	hmg-12	Y17G7A.1	1799	1928	2983	3066	1240	1264	949	986	787	813	890	942	797	842	874	930
WBGene00001978	hmp-1	R13H4.4	639	741	1360	1379	721	740	468	458	539	472	684	668	1767	1826	1931	1954
WBGene00001979	hmp-2	K05C4.6	505	585	1053	1050	491	482	551	555	548	502	383	312	1273	1301	1382	1435
WBGene00001980	hmr-1	W02B9.1	709	559	764	822	1676	1578	1799	1556	1572	1509	1574	1594	2295	2563	2471	2680
WBGene00001983	hoe-1	E04A4.4	2141	3953	1315	1313	854	913	703	735	741	696	809	817	1519	1544	1648	1699
WBGene00001984	hog-1	W06B11.4	135	38	9	9	237	249	339	348	302	276	267	287	22	47	25	22
WBGene00001985	hop-1	C18E3.8	142	153	358	377	61	62	85	80	81	79	74	79	522	533	602	598
WBGene00001986	hot-1	F43D2.4	98	76	45	44	75	59	60	64	77	66	60	55	59	77	62	55
WBGene00001987	hot-2	Y39B6A.48	15	12	6	7	17	15	8	7	6	6	9	9	15	36	21	19
WBGene00001989	hot-4	T12A2.16	28	18	10	9	23	29	1	3	5	4	8	6	26	52	33	22
WBGene00001990	hot-5	K07A12.6	25	12	7	7	22	20	13	17	15	5	15	14	16	44	27	19
WBGene00001991	hot-6	C13G3.2	52	50	28	35	46	37	23	20	15	16	19	14	69	77	78	63
WBGene00001993	hpd-1	T21C12.2	1420	2164	1842	1825	2727	2393	4875	4519	3587	3367	4351	4301	876	799	907	964
WBGene00001994	hpk-1	F20B6.8	451	469	259	310	732	613	516	438	589	538	730	777	979	977	920	911
WBGene00001995	hpl-1	K08H2.6	39	42	40	40	72	63	72	88	77	82	44	46	120	104	112	96
WBGene00001996	hpl-2	K01G5.2	510	537	971	941	394	407	492	484	502	474	483	499	529	528	551	566
WBGene00001997	hpr-9	Y39A1A.23	210	204	310	314	124	118	139	162	143	152	162	189	648	630	670	656
WBGene00001998	hpr-17	F32A11.2	248	254	505	499	136	147	166	172	156	164	170	186	752	708	805	821
WBGene00001999	hrp-1	F42A6.7	3343	3148	4354	4586	3305	3092	3930	3707	3817	3806	3616	3532	994	1042	1024	1172
WBGene00002000	hrp-2	F58D5.1	3620	3776	4934	5138	3709	3609	3581	3423	4064	3990	3463	3307	1777	1879	1823	2050
WBGene00002001	hars-1	T11G6.1	1247	1347	1632	1640	1152	1132	1435	1406	1800	1712	1611	1566	1185	1171	1172	1256
WBGene00002002	hsb-1	K08E7.2	418	444	564	589	405	465	447	483	411	439	437	437	337	351	362	393
WBGene00002003	hse-5	B0285.5	352	394	782	792	478	442	178	180	167	162	204	160	1135	1179	1268	1284
WBGene00002004	hsf-1	Y53C10A.12	444	461	720	726	350	333	356	379	403	407	560	612	1242	1269	1332	1352
WBGene00002005	hsp-1	F26D10.3	28908	29998	28458	29242	27114	26261	41536	39186	30006	30369	37994	37832	1783	2009	1972	2222
WBGene00002007	hsp-3	C15H9.6	9418	8234	5618	5729	18598	16754	16305	14224	14446	12542	17128	15568	1812	1915	1851	2032
WBGene00002008	hsp-4	F43E2.8	5008	4457	3201	3297	3472	3515	16449	15252	14197	13202	20231	22081	1640	1754	1823	1979
WBGene00002010	hsp-6	C37H5.8	6023	6738	5717	5922	5791	5336	9842	8639	10807	11018	9393	8872	1909	2077	2105	2309
WBGene00002011	hsp-12.2	C14B9.1	598	645	454	473	745	714	1060	976	1249	1164	900	905	164	170	163	164
WBGene00002012	hsp-12.3	F38E11.1	29	16	27	25	26	21	189	199	412	596	185	221	63	17	38	30
WBGene00002013	hsp-12.6	F38E11.2	2	3	14	12	3	3	352	322	892	1002	431	482	12	9	25	11
WBGene00002018	hsp-16.41	Y46H3A.2	3	4	37	5	22	23	31963	30042	41633	39379	31424	31142	2	8	1	4
WBGene00002021	hsp-17	F52E1.7	215	202	146	122	613	600	506	512	428	370	489	514	171	218	173	171
WBGene00002023	hsp-25	C09B8.6	1195	1271	979	927	1390	1325	1834	1716	1816	1714	1679	1767	470	449	465	484
WBGene00002024	hsp-43	C14F11.5	560	929	764	730	163	148	582	482	906	930	581	742	630	633	605	632
WBGene00002025	hsp-60	Y22D7AL.5	4355	5016	4403	4452	4524	3797	5175	4737	7975	7661	4977	4807	1621	1712	1698	1903
WBGene00002026	hsp-70	C12C8.1	14	25	32	14	34	29	41237	37669	43889	38278	35235	36865	14	14	6	5
WBGene00002027	hsr-9	T05F1.6	2666	2873	4537	4825	1551	1498	1390	1342	1582	1512	1662	1484	2945	3054	3093	3336
WBGene00002028	hst-1	F08B4.6	295	294	574	619	216	267	159	163	153	162	160	163	1211	1169	1293	1332
WBGene00002029	hst-2	C34F6.4	56	56	116	118	71	72	28	23	17	16	44	28	345	302	346	326
WBGene00002030	hst-3.1	F40H3.5	12	12	14	13	35	41	11	9	8	6	34	25	29	52	25	24
WBGene00002031	hst-6	Y34B4A.3	29	25	117	102	40	47	16	14	19	15	27	26	308	261	285	267
WBGene00002032	htp-1	F41H10.10	808	829	1168	1207	522	552	551	568	569	588	574	569	699	697	748	769
WBGene00002033	htp-2	Y73B6BL.2	427	425	627	629	196	199	256	275	295	324	283	286	622	585	671	664
WBGene00002034	htp-3	F57C9.5	786	839	939	1035	617	591	542	560	567	558	536	582	1329	1255	1359	1379
WBGene00002035	hum-1	F29D10.4	801	773	1050	1062	527	553	358	345	355	328	607	628	1812	1876	2003	2071
WBGene00002036	hum-2	F36D4.3	1765	1635	1762	1942	1317	1323	1316	1243	1273	1208	1318	1588	3132	3204	3361	3419
WBGene00002037	hum-4	F46C3.3	957	665	375	376	1448	1531	1156	1085	1186	1108	1150	1121	1127	1321	1030	1028
WBGene00002038	hum-5	T02C12.1	1432	1368	692	651	1546	1500	1474	1391	1649	1446	1495	1533	1071	1082	1007	976
WBGene00002039	hum-6	T10H10.1	459	381	121	126	1743	1687	1123	1035	1421	1310	1320	1155	441	737	425	349
WBGene00002040	hum-7	F56A6.2	498	400	251	266	385	371	242	246	239	214	150	141	503	419	383	372
WBGene00002041	hum-8	Y66H1A.6	952	873	493	456	943	944	613	662	526	566	572	548	880	756	729	725
WBGene00002042	hus-1	H26D21.1	116	138	300	299	71	60	90	81	87	96	83	90	389	355	422	391
WBGene00002043	hyl-1	C09G4.1	746	627	647	623	415	469	375	381	347	352	359	382	742	744	796	821
WBGene00002044	hyl-2	K02G10.6	460	426	391	409	616	640	375	325	326	305	335	280	611	565	612	602
WBGene00002045	icd-1	C56C10.8	10038	10712	11179	10766	10003	9706	13121	13232	15593	16394	12900	12378	708	776	765	851
WBGene00002046	icln-1	C01F6.8	553	557	749	777	394	390	466	500	503	538	433	460	516	505	516	549
WBGene00002047	icp-1	Y39G10AR.13	488	550	983	1069	418	447	384	356	391	409	343	346	1190	1208	1302	1330
WBGene00002048	ida-1	B0244.2	549	463	252	229	659	679	478	410	519	402	745	826	494	739	556	550
WBGene00002050	ifa-1	F38B2.1	1994	2135	1160	1141	1168	1105	1527	1416	1936	1811	1463	1467	582	544	462	483
WBGene00002052	ifa-4	K05B2.3	2294	2193	624	638	477	487	635	619	685	710	555	545	691	522	535	507
WBGene00002053	ifb-1	F10C1.2	5185	5314	2327	2300	5373	5156	6574	6002	6572	5701	6575	5936	1151	1216	1099	1127
WBGene00002054	ifb-2	F10C1.7	5208	5198	960	942	2584	2646	2776	2749	3425	3460	2727	2621	816	874	894	855
WBGene00002055	ifc-1	F37B4.2	1516	1777	459	522	1139	1128	523	580	437	508	462	413	468	464	540	505
WBGene00002056	ifc-2	M6.1	4805	5597	1436	1334	2526	2556	1784	1669	1727	1756	1699	1618	1248	1228	1222	1134
WBGene00002057	ifd-1	R04E5.10	778	625	137	132	393	418	313	336	265	303	302	308	258	357	286	216
WBGene00002058	ifd-2	F25E2.4	646	363	152	154	297	298	322	339	269	268	293	309	362	271	307	262
WBGene00002059	ife-1	F53A2.6	3173	2945	3133	3023	2457	2500	3265	3507	3140	3253	2780	2949	714	743	770	826
WBGene00002060	ife-2	R04A9.4	439	440	374	371	774	719	842	775	746	736	804	720	354	361	338	348
WBGene00002061	ife-3	B0348.6	2023	2365	3373	3372	1168	1246	1266	1206	1137	1204	1115	1237	860	925	936	1041
WBGene00002062	ife-4	C05D9.5	112	101	88	88	168	169	158	146	135	121	125	112	159	164	135	136
WBGene00002063	ife-5	Y57A10A.30	145	132	127	124	144	142	159	170	153	153	148	156	231	194	231	214
WBGene00002064	iff-1	T05G5.10	5510	5924	8378	7980	3206	3154	3880	4083	3737	4226	3347	3489	441	485	473	534
WBGene00002065	iff-2	F54C9.1	3845	3723	1652	1670	6781	6388	8294	7928	10019	9862	7550	7266	550	599	561	583
WBGene00002066	ifg-1	M110.4	6618	6660	5824	5913	5594	5536	3910	3682	4379	4287	4709	4533	3363	3468	3498	3779
WBGene00002067	ifp-1	C43C3.1	1125	777	162	139	1010	919	459	436	420	446	444	449	168	469	276	231
WBGene00002068	ify-1	C27A2.3	1035	1089	1805	1916	350	370	328	368	311	324	302	299	741	794	809	879
WBGene00002069	ikb-1	C04F12.3	99	66	46	53	150	144	187	175	220	174	428	479	101	108	88	81
WBGene00002070	ile-1	K07A1.8	2483	2050	2291	2221	2745	2797	2810	2774	2265	2240	2451	2445	1119	1142	1181	1305
WBGene00002071	ile-2	T04G9.3	685	570	652	608	1121	1094	1287	1199	1249	1171	1263	1175	571	556	562	563
WBGene00002072	ima-1	T19B10.7	557	685	1375	1439	270	283	266	266	275	293	274	245	1243	1266	1375	1423
WBGene00002073	ima-2	F26B1.3	2202	2585	5752	5865	1615	1635	1188	1234	1150	1400	1167	1140	1471	1615	1638	1795
WBGene00002074	ima-3	F32E10.4	3101	3108	2920	3065	2966	2894	2247	2036	2379	2248	2556	2399	1854	1923	1951	2125
WBGene00002075	imb-1	F28B3.8	687	743	928	1021	774	728	1015	929	1190	1148	1197	1166	2145	2142	2141	2321
WBGene00002076	imb-2	R06A4.4	1424	1550	2447	2580	1095	1046	931	841	977	1010	990	920	2087	2082	2180	2310
WBGene00002077	imb-3	C53D5.6	7817	7936	7081	7405	6198	5866	5768	5487	6535	6328	6283	6499	2788	2845	2816	3113
WBGene00002078	xpo-1	ZK742.1	3282	3377	4144	4599	2771	2700	3226	2807	3926	3786	4348	4991	3130	3248	3304	3661
WBGene00002079	xpo-2	Y48G1A.5	1593	1602	2653	2864	1340	1269	973	858	912	949	1018	973	2124	2147	2223	2384
WBGene00002080	xpo-3	C49H3.10	1049	1077	1178	1241	838	830	685	658	772	724	825	798	2040	2011	2095	2174
WBGene00002081	ina-1	F54G8.3	723	559	571	531	976	1018	433	400	382	342	477	517	1090	1087	998	970
WBGene00002083	inf-1	F57B9.6	6700	7108	6443	6293	6249	6053	4920	4696	4691	4458	5429	5225	1278	1340	1337	1481
WBGene00002084	ins-1	F13B12.5	18	17	13	12	17	21	7	5	8	10	20	24	29	66	44	34
WBGene00002086	ins-3	ZK75.3	19	24	19	18	18	12	7	5	11	8	11	11	35	30	29	23
WBGene00002087	ins-4	ZK75.1	19	30	15	18	24	13	88	69	142	164	118	105	29	22	22	18
WBGene00002088	ins-5	ZK84.3	10	17	4	5	21	26	21	19	18	16	22	19	24	39	31	26
WBGene00002089	ins-6	ZK84.6	29	32	25	21	29	36	9	5	4	6	4	12	50	38	38	33
WBGene00002090	ins-7	ZK1251.2	16	14	17	20	39	35	11	12	4	7	7	8	55	58	53	35
WBGene00002100	ins-17	F56F3.6	75	56	47	45	67	72	68	54	92	64	71	60	101	103	91	86
WBGene00002101	ins-18	T28B8.2	18	14	11	9	21	22	21	22	28	26	28	32	26	34	25	21
WBGene00002105	ins-22	M04D8.2	13	11	7	9	11	15	1	3	3	3	2	4	20	19	21	14
WBGene00002107	ins-24	ZC334.3	25	19	16	22	24	33	30	27	33	30	33	29	14	18	18	18
WBGene00002109	ins-26	ZC334.1	26	23	20	19	27	24	10	8	12	10	15	15	29	41	27	44
WBGene00002110	ins-27	ZC334.11	60	46	32	24	150	146	228	235	259	268	220	193	41	60	50	61
WBGene00002111	ins-28	ZC334.9	21	17	15	16	19	20	18	15	23	14	17	21	29	25	28	51
WBGene00002113	ins-30	ZC334.2	37	29	18	26	45	47	28	33	41	34	35	34	24	47	22	43
WBGene00002116	ins-33	W09C5.4	46	54	32	33	67	70	263	254	299	330	189	212	23	32	12	9
WBGene00002123	inx-1	C16E9.4	231	221	129	107	394	392	152	155	135	128	168	150	151	331	170	160
WBGene00002125	inx-3	F22F4.2	55	94	372	405	85	76	32	29	33	40	43	42	810	806	789	839
WBGene00002127	inx-5	R09F10.4	540	566	338	315	615	616	453	427	484	440	471	467	341	485	339	324
WBGene00002128	inx-6	C36H8.2	49	62	50	41	123	124	81	56	91	70	73	74	55	131	71	59
WBGene00002129	inx-7	K02B2.4	126	122	160	162	120	110	129	128	158	146	158	142	499	408	524	490
WBGene00002130	inx-8	ZK792.2	382	474	900	851	190	191	200	206	161	172	180	184	798	742	856	865
WBGene00002131	inx-9	ZK792.3	163	192	263	226	110	119	145	127	152	127	139	160	411	371	399	372
WBGene00002132	inx-10	T18H9.5	148	136	96	93	193	180	72	70	68	57	97	88	272	250	237	228
WBGene00002133	inx-11	W04D2.3	82	92	164	152	67	62	43	44	38	54	48	40	430	347	389	347
WBGene00002134	inx-12	ZK770.3	983	969	671	624	1234	1159	1469	1418	1671	1509	1496	1350	515	637	565	522
WBGene00002135	inx-13	Y8G1A.2	753	798	495	476	1168	1061	1124	1028	1351	1284	1176	1048	519	654	522	505
WBGene00002136	inx-14	F07A5.1	437	541	1178	1235	168	164	199	221	211	234	220	230	989	1028	1098	1153
WBGene00002137	inx-15	R12E2.9	1039	800	374	363	754	805	596	637	572	620	497	511	380	392	400	370
WBGene00002138	inx-16	R12E2.5	887	715	384	412	772	755	637	596	589	631	546	536	444	426	463	440
WBGene00002139	inx-17	R12E2.4	443	368	166	160	315	311	248	242	268	274	230	223	283	275	283	259
WBGene00002140	inx-18	C18H7.2	95	62	21	24	34	42	18	19	13	14	13	24	25	51	33	27
WBGene00002141	inx-19	T16H5.1	14	6	5	4	12	11	8	7	4	6	9	5	19	37	28	22
WBGene00002142	inx-20	T23H4.1	15	16	5	7	17	19	9	12	13	6	15	15	24	46	31	25
WBGene00002143	inx-21	Y47G6A.1	291	269	403	396	174	171	246	244	282	272	233	265	706	676	762	745
WBGene00002144	inx-22	Y47G6A.2	305	390	935	970	129	128	84	87	89	124	89	87	994	997	1063	1118
WBGene00002146	ipp-5	C09B8.1	283	306	157	150	196	191	94	85	65	71	90	83	321	303	261	259
WBGene00002147	ire-1	C41C4.4	1123	1090	1530	1560	981	971	705	734	723	716	840	817	1914	1938	2057	2057
WBGene00002148	gon-14	F44C4.4	588	703	1113	1161	409	429	329	339	390	401	361	367	1872	1917	1993	2076
WBGene00002149	irk-1	R03E9.4	11	13	9	9	23	30	18	16	19	18	23	28	17	40	17	18
WBGene00002150	irk-2	M02A10.2	52	23	17	18	38	45	15	15	11	14	10	12	46	35	40	29
WBGene00002151	irk-3	K04G11.5	33	46	52	47	46	36	28	29	28	19	46	42	126	119	151	95
WBGene00002152	iars-1	R11A8.6	4321	4770	3949	3932	3900	3703	4450	4236	5493	5035	5013	4735	2438	2550	2520	2768
WBGene00002153	iars-2	C25A1.7	1057	1148	1307	1271	978	1008	1048	1017	1119	1077	1102	1086	1740	1625	1698	1701
WBGene00002162	isp-1	F42G8.12	4420	4700	3746	3731	5211	4945	6623	6361	6869	6666	5894	5662	803	872	864	952
WBGene00002163	ist-1	C54D1.3	77	94	81	90	86	85	61	66	57	62	92	115	174	172	130	151
WBGene00002169	isw-1	F37A4.8	1349	1477	2304	2424	1101	1084	958	940	954	947	1080	1020	2258	2354	2423	2590
WBGene00002173	itr-1	F33D4.2	2148	2134	1287	1273	1637	1626	942	1013	1186	1180	959	920	2490	2054	2195	2109
WBGene00002174	itx-1	W03D8.6	799	841	358	380	1068	1048	820	773	932	800	739	728	823	826	746	723
WBGene00002175	jac-1	Y105C5B.21	318	301	208	254	658	605	575	487	400	377	469	423	717	674	583	612
WBGene00002176	jip-1	F56D12.4	46	50	36	42	66	67	46	41	58	59	70	73	167	186	119	140
WBGene00002177	jkk-1	F35C8.3	10	11	10	6	15	13	7	6	7	8	17	14	19	41	21	15
WBGene00002178	jnk-1	B0478.1	67	70	46	45	78	88	13	13	13	14	27	26	85	176	100	92
WBGene00002179	jph-1	T22C1.7	959	796	447	448	987	969	1024	955	1185	1110	719	567	434	608	415	407
WBGene00002180	jtr-1	Y77E11A.4	134	123	269	280	130	129	48	54	42	42	48	47	265	274	292	304
WBGene00002181	kal-1	K03D10.1	46	30	25	29	103	99	28	28	24	26	57	37	140	218	169	152
WBGene00002182	kap-1	F08F8.3	43	37	24	21	51	47	36	34	34	33	38	26	121	136	112	102
WBGene00002183	kat-1	T02G5.8	3154	4422	3582	3626	3203	2945	3450	3409	3744	3576	3117	2858	935	890	998	1088
WBGene00002184	kel-1	C47D12.7	31	25	37	32	45	52	49	56	78	58	50	44	78	98	72	54
WBGene00002185	kel-3	T27E9.4	305	317	518	481	278	294	285	285	336	331	335	296	807	780	875	859
WBGene00002186	kel-10	T16H12.6	950	802	183	138	123	132	123	199	111	112	133	149	7	7	12	9
WBGene00002187	kgb-1	T07A9.3	691	596	324	320	745	690	521	491	428	432	616	612	449	436	391	371
WBGene00002188	kgb-2	ZC416.4	38	38	6	6	18	27	24	22	17	22	27	29	58	69	33	33
WBGene00002189	kin-1	ZK909.2	1389	1318	619	619	1362	1318	1309	1151	1314	1290	1263	1381	600	714	586	587
WBGene00002190	kin-2	R07E4.6	1344	1295	735	762	1903	1758	1259	1093	1122	1142	1180	1084	909	960	890	949
WBGene00002191	kin-3	B0205.7	2745	2715	2925	2934	2921	2874	3429	3130	3745	3612	3536	3538	1035	1118	1114	1213
WBGene00002192	kin-4	C10C6.1	1128	1201	1771	1902	751	736	795	733	844	832	811	795	3110	3216	3392	3586
WBGene00002195	kin-9	F08F1.1	41	27	24	20	13	14	7	8	7	8	10	14	35	40	28	26
WBGene00002196	kin-10	T01G9.6	1986	1948	2126	2081	1910	1947	2032	2008	2035	1993	2035	2032	761	799	821	871
WBGene00002198	kin-14	F22D6.1	295	269	135	108	133	149	154	174	113	113	159	167	122	113	130	85
WBGene00002199	kin-15	M176.6	100	109	80	77	18	20	10	10	8	10	10	6	233	184	158	188
WBGene00002200	kin-16	M176.7	145	268	119	123	63	59	47	39	38	45	53	39	179	149	157	127
WBGene00002201	kin-18	T17E9.1	1664	1628	2085	2151	933	963	972	987	1023	985	1110	1059	2202	2239	2344	2465
WBGene00002202	kin-19	C03C10.1	4079	4144	3725	3736	3899	3906	4016	3661	4045	3620	4172	4018	1357	1438	1459	1585
WBGene00002203	kin-20	F46F2.2	884	612	273	312	571	558	435	353	458	498	414	446	680	698	602	649
WBGene00002207	sid-3	B0302.1	581	511	457	450	455	490	340	295	248	252	314	363	1103	883	947	912
WBGene00002210	kin-29	F58H12.1	513	459	230	267	528	582	380	307	352	316	429	389	584	629	525	499
WBGene00002211	kin-30	M01B2.1	16	17	18	18	18	15	13	18	17	20	22	25	37	30	31	26
WBGene00002212	kin-31	B0523.1	192	149	30	32	30	43	57	69	34	40	26	51	12	4	10	9
WBGene00002213	kin-32	C30F8.4	141	111	114	104	149	165	92	89	89	82	107	104	392	401	320	319
WBGene00002214	klc-1	M7.2	889	1077	2119	2130	406	425	767	727	1343	1332	750	767	1230	1274	1350	1408
WBGene00002215	klc-2	C18C4.10	743	652	455	474	875	867	984	907	1007	937	1053	952	746	796	723	730
WBGene00002216	klp-3	T09A5.2	353	319	239	224	236	208	244	221	221	214	247	238	418	402	351	289
WBGene00002217	klp-4	F56E3.3	911	783	505	499	944	997	905	824	1009	994	925	886	872	841	760	698
WBGene00002219	klp-7	K11D9.1	1160	1115	1383	1453	679	678	563	559	539	550	601	660	1372	1397	1452	1528
WBGene00002220	gcc-1	C15C7.2	186	165	148	154	200	198	190	179	176	156	128	146	435	373	386	370
WBGene00002221	klp-10	C33H5.4	426	479	753	714	145	152	109	106	129	137	99	102	1187	1185	1253	1261
WBGene00002222	klp-11	F20C5.2	103	99	64	62	143	139	125	112	116	116	127	129	188	381	204	187
WBGene00002223	klp-12	T01G1.1	1795	1743	1865	1944	2352	2171	2226	2248	2613	2412	2296	2185	2675	2594	2731	2810
WBGene00002224	klp-13	F22F4.3	28	21	26	25	39	34	23	16	29	28	38	49	51	52	44	35
WBGene00002225	klp-15	M01E11.6	953	1100	2219	2191	233	246	80	75	80	106	70	65	1283	1313	1335	1425
WBGene00002226	klp-16	C41G7.2	849	974	1937	1916	277	304	127	140	155	184	126	108	1260	1326	1349	1425
WBGene00002228	klp-18	C06G3.2	939	996	1563	1583	527	558	473	484	562	596	495	479	1583	1588	1665	1707
WBGene00002229	klp-19	Y43F4B.6	1575	1769	2860	3130	1032	985	830	839	847	942	777	749	2364	2538	2616	2777
WBGene00002230	klp-20	Y50D7A.6	137	123	183	203	138	156	138	127	121	133	123	120	486	408	409	438
WBGene00002231	knl-1	C02F5.1	783	841	1242	1333	643	616	579	598	637	646	604	619	2042	2029	2124	2219
WBGene00002232	kpc-1	F11A6.1	333	342	205	223	597	583	627	552	625	509	1003	1201	422	468	374	365
WBGene00002233	kqt-1	C25B8.1	24	22	14	16	42	45	38	38	49	37	79	69	48	84	43	40
WBGene00002234	kqt-2	M60.5	182	201	85	86	158	157	141	119	132	118	143	149	230	187	137	150
WBGene00002235	kqt-3	Y54G9A.3	109	100	70	60	96	81	28	26	19	22	20	20	123	112	88	90
WBGene00002238	kars-1	T02G5.9	5533	6902	5499	5455	3528	3475	3111	3063	3105	3066	3165	3214	1595	1657	1661	1855
WBGene00002239	ksr-1	F13B9.5	188	196	156	168	188	185	115	112	120	108	169	167	428	416	394	365
WBGene00002240	ksr-2	F58D5.4	269	328	551	580	181	198	175	172	188	184	253	371	1021	1016	1073	1093
WBGene00002241	kup-1	F10C2.2	547	652	1249	1317	416	427	451	486	466	482	462	457	763	768	805	830
WBGene00002242	kvs-1	C53C9.3	26	24	23	18	36	32	13	10	12	14	32	25	50	71	68	53
WBGene00002243	lad-2	Y54G2A.25	85	49	20	21	104	91	43	48	43	40	46	44	65	209	100	95
WBGene00002244	laf-1	Y71H2AM.19	2286	2390	2022	2206	2364	2118	2031	1871	2274	2231	2153	2054	1900	1901	1845	2080
WBGene00002245	lag-1	K08B4.1	331	383	721	759	298	290	288	274	304	302	306	282	1438	1442	1493	1616
WBGene00002247	lam-1	W03F8.5	4045	3739	2074	2039	5230	4970	5304	4847	6189	5386	5681	5351	1653	1829	1545	1608
WBGene00002248	lam-3	T22A3.8	71	174	334	330	785	643	414	430	570	538	557	442	987	1182	706	827
WBGene00002249	lap-1	ZK353.6	2400	2604	2131	2092	1333	1280	1493	1425	1421	1318	1443	1430	1093	1130	1175	1258
WBGene00002250	lap-2	W07G4.4	3818	3839	3353	3467	2721	2813	4036	3526	3993	3357	3780	3981	1433	1475	1555	1682
WBGene00002251	lat-1	B0457.1	950	890	1291	1420	628	634	662	650	659	674	773	763	2144	2258	2407	2521
WBGene00002252	lat-2	B0286.2	97	55	31	24	60	74	54	48	50	44	51	60	66	78	62	63
WBGene00002253	lbp-1	F40F4.3	237	274	446	432	219	212	196	196	239	217	200	218	288	270	293	288
WBGene00002254	lbp-2	F40F4.2	2520	2748	3269	3114	2308	2181	3556	3724	4145	3924	3470	3469	408	435	460	506
WBGene00002255	lbp-3	F40F4.4	742	653	670	614	695	712	818	846	742	790	669	673	287	272	301	320
WBGene00002256	lbp-4	ZK742.5	247	253	448	462	385	368	432	448	423	434	389	401	318	341	345	358
WBGene00002257	lbp-5	W02D3.7	709	750	310	283	312	342	224	250	184	210	190	193	136	178	144	133
WBGene00002258	lbp-6	W02D3.5	3979	3312	3423	3292	6136	5705	5368	5334	4418	4516	4860	4616	383	396	413	431
WBGene00002259	lbp-7	T22G5.2	697	824	135	134	231	239	242	258	161	164	183	201	133	162	108	107
WBGene00002260	lbp-8	T22G5.6	9	6	24	18	12	11	4	4	4	2	3	5	99	24	26	39
WBGene00002261	ldb-1	F58A3.1	358	303	177	203	467	438	291	273	369	309	448	375	613	738	593	573
WBGene00002262	ldh-1	F13D12.2	723	992	1012	995	1271	1297	1837	1727	1812	1702	1610	1483	629	576	640	664
WBGene00002263	lea-1	K08H10.1	2642	2847	2404	2557	3014	2956	4595	4147	5206	4605	5010	5501	2664	2662	3305	3048
WBGene00002264	lec-1	W09H1.6	6737	6870	3903	3978	6462	6319	5466	4921	3931	3652	4719	4939	755	803	813	877
WBGene00002265	lec-2	F52H3.7	5217	7610	3929	3854	2419	2272	3382	3161	3910	3904	3211	3394	1551	1312	1348	1407
WBGene00002266	lec-3	ZK892.1	1757	1476	303	296	599	647	720	654	571	545	508	558	339	486	361	342
WBGene00002267	lec-4	C44F1.3	613	638	804	824	1178	1171	1684	1690	2105	2069	1793	1807	458	437	457	445
WBGene00002268	lec-5	ZK1248.16	2063	2086	2156	2026	2144	2102	3602	3723	4525	4302	3704	3670	601	597	644	644
WBGene00002269	lec-6	Y55B1AR.1	3309	3109	2491	2410	3548	3495	5643	5373	5217	4433	5011	5367	357	378	363	392
WBGene00002270	lec-7	R07B1.2	16	20	23	16	5	8	11	16	19	20	29	36	24	37	23	22
WBGene00002271	lec-8	R07B1.10	753	833	521	524	784	789	431	447	270	264	478	526	420	420	407	416
WBGene00002272	lec-9	C16H3.2	1142	1368	782	707	923	915	549	595	546	450	597	634	319	354	348	343
WBGene00002273	lec-10	W01A11.4	2368	2856	982	900	3274	3188	2064	1986	1140	1119	1828	1753	421	472	429	493
WBGene00002274	lec-11	F38A5.3	531	746	100	85	132	141	99	108	81	78	154	154	174	182	129	129
WBGene00002275	lem-2	W01G7.5	366	351	533	506	471	436	375	350	465	510	428	414	875	835	899	942
WBGene00002276	lem-3	F42H11.2	364	391	761	784	242	245	600	569	568	514	833	1058	1181	1191	1267	1295
WBGene00002280	let-2	F01G12.5	21306	19447	8227	8685	21822	20654	31714	25948	37145	33048	30167	28355	2908	3131	2859	3280
WBGene00002282	let-4	C44H4.2	19	9	5	7	1007	901	593	546	958	636	1448	894	37	269	63	76
WBGene00002295	let-19	K08F8.6	628	594	548	619	885	866	748	750	869	813	826	569	2386	2181	2018	2124
WBGene00002297	ect-2	T19E10.1	934	992	1178	1250	323	339	389	392	380	413	404	416	1958	1982	2099	2200
WBGene00002299	let-23	ZK1067.1	315	292	240	226	262	273	201	209	233	220	216	200	630	538	529	468
WBGene00002324	let-49	Y54E5B.3	140	154	274	285	102	102	122	111	111	118	135	118	417	390	423	432
WBGene00002335	let-60	ZK792.6	943	938	1044	1061	993	918	908	828	897	798	929	829	834	852	844	895
WBGene00002344	let-70	M7.1	4229	4347	5164	5183	3966	3953	4243	3840	4051	3954	4257	4270	781	865	854	960
WBGene00002348	myo-1	R06C7.10	3542	4248	2027	2152	4979	4424	7205	6210	12693	11438	8136	7398	1136	1270	1018	1039
WBGene00002363	let-92	F38H4.9	2513	2508	3326	3289	2572	2506	2195	1903	2090	1994	2348	2246	1303	1411	1422	1544
WBGene00002368	let-99	K08E7.3	360	427	837	947	159	143	146	154	165	210	154	160	1322	1378	1455	1526
WBGene00002393	lpr-1	Y65B4BR.2	17	9	4	4	399	402	364	372	365	338	508	391	23	81	30	23
WBGene00002497	let-268	F52H3.1	552	387	322	300	903	869	1052	1057	1339	1225	1033	1056	477	381	390	334
WBGene00002583	let-363	B0261.2	1703	1688	1686	1853	1609	1587	1432	1398	1591	1572	1527	1535	4008	3788	3943	4130
WBGene00002601	let-381	F26B1.7	9	12	7	7	14	9	8	9	6	8	13	5	21	42	19	22
WBGene00002632	let-413	F26D11.11	409	345	275	297	466	461	246	238	238	217	237	255	744	785	697	660
WBGene00002637	let-418	F26F12.7	2412	2522	3433	3719	3053	2918	2792	2847	3374	3260	3141	2946	3632	3608	3700	3920
WBGene00002694	let-502	C10H11.9	1813	1931	2062	2152	1505	1385	1040	1064	1151	1107	1273	1287	2529	2517	2613	2685
WBGene00002696	let-504	E01A2.4	845	944	1375	1463	717	650	702	733	840	819	714	692	1025	1025	1039	1103
WBGene00002717	let-526	C01G8.9	1618	1570	1741	1930	1703	1665	1652	1510	1708	1608	1657	1443	3388	3469	3559	3856
WBGene00002783	let-607	F57B10.1	1310	1120	1069	1138	1457	1429	2347	2022	2444	2331	3054	3288	47	51	52	55
WBGene00002804	let-630	Y110A7A.19	930	949	1007	973	902	939	826	832	935	906	850	815	978	981	991	1052
WBGene00002827	let-653	C29E6.1	7	23	60	57	857	720	347	351	447	422	534	417	148	350	140	140
WBGene00002845	let-711	F57B9.2	5036	5303	5933	6507	3701	3666	2826	2685	3192	3013	3532	3249	5977	6225	6182	6806
WBGene00002850	let-716	C16A3.3	4170	4283	3591	3580	3115	3035	2718	2777	3104	2882	3369	3209	3171	3085	3033	3313
WBGene00002855	let-721	C05D11.12	1740	1838	2015	1957	1827	1814	2241	2171	2214	2190	1988	1944	1301	1278	1405	1470
WBGene00002879	let-754	C29E4.8	1765	1869	1907	1854	2367	2262	2346	2203	2015	2098	2076	1940	735	750	775	824
WBGene00002881	let-756	C05D11.4	98	109	58	63	160	133	63	50	47	36	120	119	105	179	101	96
WBGene00002889	let-765	F20H11.2	1123	1222	1209	1347	886	817	1249	1119	1593	1498	1824	1955	3380	3373	3497	3698
WBGene00002891	let-767	C56G2.6	2579	2431	2820	2782	3975	3828	3467	3222	3733	3741	3623	3354	773	793	830	881
WBGene00002915	let-805	H19M22.2	3937	3368	1488	1712	5928	5315	4269	3637	4572	4043	4634	3590	2768	3295	2535	2700
WBGene00002957	let-858	F33A8.1	1116	1140	1442	1506	1111	1111	1260	1265	1367	1402	1293	1203	1523	1529	1593	1657
WBGene00002974	lev-1	F09E8.7	97	79	67	67	158	147	89	96	65	67	54	50	79	118	79	75
WBGene00002975	lev-8	C35C5.5	36	32	25	26	52	63	28	24	29	28	42	40	38	55	39	31
WBGene00002976	lev-9	T07H6.5	110	87	54	57	87	91	65	73	66	62	62	68	29	45	26	26
WBGene00002977	lev-10	Y105E8A.7	432	396	295	273	455	444	399	377	412	370	372	328	291	299	240	221
WBGene00002978	lev-11	Y105E8B.1	18680	19032	12377	12392	21197	20290	32227	30097	37336	34964	29512	27744	1267	1330	1314	1390
WBGene00002979	lfe-2	C46H11.4	629	706	364	356	519	514	297	316	205	215	324	407	583	524	496	561
WBGene00002980	lgg-1	C32D5.9	2793	3011	2400	2519	1034	1132	2660	2430	3337	2862	3303	4056	525	573	575	630
WBGene00002981	lgg-2	ZK593.6	526	564	695	750	267	254	375	332	396	398	587	773	628	662	683	738
WBGene00002982	lgg-3	B0336.8	91	103	200	197	76	68	55	63	52	40	50	44	188	184	192	189
WBGene00002983	lgx-1	C54G7.3	695	137	12	12	959	1052	1549	1336	1757	1596	1196	1327	64	223	84	87
WBGene00002985	lig-1	C29A12.3	716	808	1648	1750	475	504	439	420	418	437	453	436	1497	1530	1609	1667
WBGene00002986	lig-4	C07H6.1	376	377	477	487	298	320	271	277	291	292	321	314	957	904	978	994
WBGene00002988	lim-6	K03E6.1	87	67	42	39	59	46	57	47	55	58	42	40	82	51	55	58
WBGene00002989	lim-7	C04F1.3	93	87	57	52	87	87	77	67	85	56	81	62	175	184	157	148
WBGene00002990	lin-1	C37F5.1	131	119	56	70	152	148	183	171	164	143	236	279	128	141	92	103
WBGene00002991	lin-2	F17E5.1	237	228	156	171	293	278	150	126	109	100	151	130	280	297	261	243
WBGene00002992	lin-3	F36H1.4	195	230	503	502	77	71	70	78	92	118	132	126	894	891	961	968
WBGene00002994	lin-5	T09A5.10	934	1088	2001	2041	723	768	684	667	702	738	647	648	1634	1725	1783	1819
WBGene00002996	lin-7	Y54G11A.10	194	210	298	316	172	171	168	180	206	188	183	169	369	384	412	396
WBGene00002997	lin-8	B0454.1	65	61	92	86	83	76	59	60	65	59	50	53	130	112	131	111
WBGene00002998	lin-9	ZK637.7	431	500	710	738	381	376	416	401	470	456	503	545	1223	1237	1311	1350
WBGene00002999	lin-10	C09H6.2	943	730	542	550	552	513	358	369	328	320	371	335	929	854	831	815
WBGene00003000	lin-11	ZC247.3	80	73	34	32	116	119	154	122	205	127	162	112	93	101	80	79
WBGene00003001	lin-12	R107.8	85	59	52	50	128	147	164	147	209	242	182	197	217	283	191	189
WBGene00003002	lin-13	C03B8.4	1749	1735	1849	2113	1426	1457	1104	983	1192	1166	1244	1314	3462	3388	3514	3641
WBGene00003003	lin-14	T25C12.1	316	273	134	140	246	236	388	319	348	446	373	475	316	534	368	364
WBGene00003006	lin-17	Y71F9B.5	114	77	62	71	192	191	76	78	69	57	78	59	137	187	140	137
WBGene00003007	lin-18	C16B8.1	147	193	158	148	167	175	79	72	55	54	87	70	273	251	242	239
WBGene00003009	lin-23	K10B2.1	1118	1114	1580	1589	844	828	689	649	812	666	913	841	1693	1748	1800	1914
WBGene00003010	lin-24	B0001.1	297	324	493	500	185	191	171	174	176	152	377	347	530	579	606	617
WBGene00003011	lin-25	F56H9.5	100	91	183	208	191	186	85	88	84	94	96	77	797	708	759	701
WBGene00003012	lin-26	F18A1.2	424	451	634	645	591	581	329	263	445	199	516	198	1013	1075	1096	1147
WBGene00003014	lin-28	F02E9.2	334	360	478	488	243	250	258	261	237	238	202	256	604	647	669	689
WBGene00003015	lin-29	W03C9.4	117	144	66	67	528	458	286	253	333	294	359	235	153	113	94	99
WBGene00003017	lin-31	K10G6.1	18	25	25	26	34	30	32	31	25	19	32	31	34	39	40	29
WBGene00003019	lin-33	H32C10.2	159	185	104	107	269	242	267	276	236	231	332	351	158	213	163	148
WBGene00003020	lin-35	C32F10.2	605	742	1245	1273	647	650	731	711	768	746	765	771	1818	1844	1957	2010
WBGene00003021	lin-36	F44B9.6	815	856	1277	1353	595	612	677	659	637	680	726	695	1868	1920	2001	2140
WBGene00003022	lin-37	ZK418.4	232	302	551	545	131	132	167	177	173	186	192	180	554	557	587	597
WBGene00003024	lin-39	C07H6.7	62	67	50	45	92	100	137	107	142	98	95	71	153	206	156	154
WBGene00003025	lin-40	T27C4.4	738	736	1210	1297	1134	1087	1028	937	949	924	931	917	1351	1323	1314	1421
WBGene00003026	lin-41	C12C8.3	1090	1497	3035	3395	267	258	296	293	378	492	377	311	3439	3569	3636	3960
WBGene00003029	lin-44	E01A2.3	39	33	18	24	85	67	52	44	52	40	75	52	39	63	43	38
WBGene00003030	lin-45	Y73B6A.5	495	580	856	877	363	355	263	241	307	331	438	412	1835	1824	1910	2095
WBGene00003031	lin-46	R186.4	37	39	15	13	9	13	8	10	10	8	10	10	45	41	44	29
WBGene00003034	lin-49	F42A9.2	717	763	815	877	526	513	429	372	407	358	634	664	1787	1855	1976	2015
WBGene00003035	lin-52	ZK632.13	151	166	337	350	104	106	93	91	94	90	81	111	283	284	331	333
WBGene00003036	lin-53	K07A1.12	1244	1388	2611	2530	1062	1048	1151	1118	1216	1251	1194	1210	1084	1144	1169	1265
WBGene00003037	lin-54	JC8.6	433	495	1062	1068	207	231	190	212	216	234	208	213	933	948	1000	1031
WBGene00003038	lin-56	ZK673.3	106	130	225	220	67	78	89	89	80	90	105	101	419	366	430	421
WBGene00003040	lin-59	T12F5.4	642	562	645	651	735	738	761	655	887	731	1646	1612	1611	1566	1526	1558
WBGene00003041	lin-61	R06C7.7	589	609	1009	1016	379	374	324	335	340	326	445	453	984	1003	1037	1054
WBGene00003043	lip-1	C05B10.1	333	369	652	677	191	196	170	167	190	192	205	209	1034	1095	1128	1202
WBGene00003044	lir-1	F18A1.3	365	388	762	776	389	368	371	321	702	323	681	231	574	594	625	621
WBGene00003045	lir-2	F18A1.4	176	180	284	279	109	125	139	128	141	148	140	139	666	604	670	636
WBGene00003046	lir-3	F37H8.1	15	16	39	35	23	29	26	22	24	24	24	24	117	93	90	88
WBGene00003047	lis-1	T03F6.5	983	992	984	991	987	967	1189	1145	1231	1234	1056	1045	1008	991	1028	1103
WBGene00003048	lit-1	W06F12.1	966	493	600	657	1469	1469	1550	1291	1420	1246	2000	2430	1157	1207	1197	1252
WBGene00003052	lmn-1	DY3.2	3266	3215	3466	3570	2264	2247	2067	2019	2082	2116	2189	2264	1586	1681	1742	1842
WBGene00003053	lmp-1	C03B1.12	1038	922	895	932	2078	2011	924	861	749	753	1021	1035	659	673	668	725
WBGene00003055	lon-1	F48E8.1	580	374	741	698	1248	1267	1271	1206	974	875	1377	1489	543	513	515	550
WBGene00003056	lon-2	C39E6.1	254	186	230	220	194	193	128	123	74	90	119	127	530	458	483	481
WBGene00003057	lon-3	ZK836.1	293	64	6	6	7876	7905	9080	9582	2527	2557	3759	3334	10	233	26	31
WBGene00003059	lpd-2	C48E7.3	505	573	753	791	346	338	449	476	503	540	455	457	571	573	591	619
WBGene00003060	lpd-3	Y47G6A.23	1567	1451	1284	1407	1498	1399	1288	1236	1550	1616	1411	1369	3678	3185	3117	3339
WBGene00003061	lpd-5	ZK973.10	1220	1286	1334	1294	1310	1258	1592	1575	1466	1456	1309	1292	386	394	416	443
WBGene00003062	lpd-6	K09H9.6	2285	2402	2560	2601	1765	1705	1971	2022	2048	2025	1942	1963	1140	1145	1110	1211
WBGene00003063	lpd-7	R13A5.12	2712	2796	2649	2524	2080	2086	2596	2655	3113	2947	2787	2748	1176	1208	1210	1290
WBGene00003064	lpd-8	R10H10.1	484	543	856	870	380	388	375	407	346	358	303	307	464	473	503	519
WBGene00003065	lpd-9	T21C9.5	902	908	922	909	957	975	1030	1016	942	916	923	889	327	336	362	390
WBGene00003066	lpl-1	ZC410.7	621	639	748	741	680	664	476	461	381	376	459	417	688	684	711	704
WBGene00003067	lrg-1	F55H2.4	134	119	146	113	93	92	129	121	280	195	147	158	542	466	519	560
WBGene00003068	lrk-1	T27C10.6	430	367	413	470	535	524	188	211	203	213	203	187	1542	1194	1177	1174
WBGene00003071	lrp-1	F29D11.1	635	393	602	654	5906	5647	6537	6526	8549	7853	6669	6230	2445	2634	1999	2187
WBGene00003072	lrp-2	T21E3.3	1456	1702	960	1069	1432	1434	637	604	694	720	870	949	2424	2044	1784	1981
WBGene00003073	lars-1	R74.1	4107	4415	4309	4395	3182	3017	3392	3389	4295	4160	3907	3728	2604	2729	2728	2976
WBGene00003074	lars-2	ZK524.3	577	566	635	668	566	549	521	535	579	588	561	538	1120	1110	1200	1233
WBGene00003075	lrx-1	T04H1.6	168	41	3	3	114	134	197	178	189	180	154	157	18	40	19	21
WBGene00003076	lsm-1	F40F8.9	304	337	675	643	204	182	104	101	82	84	110	99	315	319	345	348
WBGene00003077	lsm-3	Y62E10A.12	280	308	465	453	265	265	304	339	289	330	296	305	221	225	235	239
WBGene00003078	lsm-4	F32A5.7	265	295	474	485	249	223	229	225	212	202	218	214	311	318	328	342
WBGene00003079	lsm-5	F28F8.3	192	226	273	269	194	193	162	171	132	145	122	133	216	222	240	254
WBGene00003080	lsm-6	Y71G12B.14	186	173	257	256	161	159	160	168	142	176	151	161	162	178	187	191
WBGene00003081	lsm-7	ZK593.7	360	326	572	591	283	275	261	292	256	260	239	240	263	276	280	304
WBGene00003082	lsm-8	Y73B6BL.32	513	567	940	918	334	343	486	511	586	604	519	542	345	345	355	369
WBGene00003083	lst-1	T22A3.3	269	307	602	661	241	268	285	316	293	306	307	314	849	862	935	982
WBGene00003084	lst-2	R160.7	341	315	255	249	339	324	268	228	195	180	358	348	701	619	667	618
WBGene00003085	ccar-1	Y37A1B.1	3489	3589	3761	4022	3426	3211	3366	3296	3994	3959	3620	3671	2550	2517	2619	2759
WBGene00003086	lst-4	Y37A1B.2	575	628	1063	1136	518	510	545	523	517	533	634	667	1292	1304	1368	1473
WBGene00003087	lsy-2	F49H12.1	166	198	185	196	179	184	134	124	115	114	158	146	529	441	453	478
WBGene00003089	ltd-1	K02C4.4	274	108	44	36	327	343	238	205	148	168	148	195	140	338	173	156
WBGene00003090	lys-1	Y22F5A.4	4809	4145	2875	2562	4293	4648	2734	2667	2907	2566	2304	2502	642	759	695	716
WBGene00003091	lys-2	Y22F5A.5	1811	2279	332	286	1155	1209	373	386	261	240	340	350	384	605	371	429
WBGene00003093	lys-4	F58B3.1	3399	957	1340	1290	6793	6541	2491	2390	1930	1848	2421	2306	522	107	509	486
WBGene00003094	lys-5	F58B3.2	30	13	15	15	37	40	17	17	13	13	18	17	42	0	36	7
WBGene00003095	lys-6	F58B3.3	26	4	21	13	56	66	25	27	13	16	18	18	103	14	107	53
WBGene00003096	lys-7	C02A12.4	226	146	287	261	351	442	504	539	557	527	326	359	577	677	698	725
WBGene00003097	lys-8	C17G10.5	2345	2069	1338	1243	2405	2568	2158	2140	2214	2304	1894	2009	621	693	651	726
WBGene00003100	mab-3	Y53C12B.5	6	5	11	8	188	174	219	191	185	188	188	202	17	12	12	16
WBGene00003102	mab-5	C08C3.3	35	34	21	14	49	52	56	47	34	28	65	38	35	66	40	31
WBGene00003104	mab-7	ZC13.4	295	42	6	9	239	318	375	372	194	198	161	211	29	85	33	28
WBGene00003106	mab-9	T27A1.6	12	12	8	10	15	17	9	8	9	2	11	11	13	35	16	14
WBGene00003107	mab-10	R166.1	97	126	107	109	1052	997	735	672	922	764	856	584	313	241	235	234
WBGene00003111	mab-20	Y71G12B.20	70	62	146	160	192	190	135	131	120	108	139	149	504	511	466	454
WBGene00003112	mab-21	F35G12.6	27	25	39	41	94	78	77	73	127	72	163	86	63	92	56	53
WBGene00003119	mac-1	Y48C3A.7	1022	1018	973	986	849	830	1063	1059	1300	1324	1064	1100	948	911	911	968
WBGene00003123	mag-1	R09B3.5	1190	1157	1598	1599	1284	1244	1560	1597	1528	1588	1423	1445	380	409	416	442
WBGene00003124	mai-1	K10B3.9	42	65	90	86	38	38	129	115	186	206	204	354	112	78	84	92
WBGene00003129	map-1	Y37E11AL.7	459	445	441	470	504	473	609	578	670	652	580	527	502	471	497	533
WBGene00003130	map-2	Y116A8A.9	2076	2279	2157	2202	1942	1810	2398	2330	2908	2872	2350	2355	1063	1046	1050	1147
WBGene00003132	mat-1	Y110A7A.17	1237	1228	1784	1757	843	825	621	596	604	581	727	686	1664	1675	1748	1862
WBGene00003133	mat-2	W10C6.1	1018	1085	1442	1543	808	885	561	620	676	666	642	665	2556	2512	2590	2710
WBGene00003134	mat-3	F10C5.1	419	457	693	726	358	363	360	330	347	344	321	340	1048	1007	1065	1084
WBGene00003136	mau-2	C09H6.3	364	385	599	589	189	188	226	215	223	251	238	257	943	917	1004	992
WBGene00003142	mau-8	Y62E10A.8	204	203	334	353	195	198	223	221	217	215	192	183	449	452	472	492
WBGene00003143	max-1	C34B4.1	87	72	44	39	108	119	85	91	130	99	99	61	142	362	198	201
WBGene00003144	max-2	Y38F1A.10	1668	1435	1426	1560	891	996	1066	977	935	1002	946	1034	1846	1949	1980	2126
WBGene00003148	mbf-1	H21P03.1	1446	2016	1236	1246	1110	1071	1533	1473	1548	1532	1645	1699	532	539	546	577
WBGene00003149	mbk-1	T04C10.1	315	232	218	232	392	400	237	230	253	243	369	442	668	640	604	617
WBGene00003150	mbk-2	F49E11.1	1643	1312	1861	1956	1075	1077	1089	1009	1207	1183	1125	1130	2080	2316	2290	2487
WBGene00003151	mca-1	W09C2.3	1625	1264	1078	1164	2078	2182	2253	2057	3104	2829	2574	2707	2160	2294	2311	2357
WBGene00003153	mca-3	Y67D8C.10	2921	2968	2383	2636	4096	3567	3821	3081	4201	4020	3516	3566	3157	3223	3195	3477
WBGene00003154	mcm-2	Y17G7B.5	1238	1472	3079	3178	1059	979	1065	1006	1209	1281	1112	1148	2028	2061	2051	2262
WBGene00003155	mcm-3	C25D7.6	825	1039	2498	2694	859	846	698	640	688	759	710	723	2008	2112	2159	2323
WBGene00003156	mcm-4	Y39G10AR.14	1049	1148	2454	2565	993	1044	625	614	519	623	578	631	1772	1797	1890	2033
WBGene00003157	mcm-5	R10E4.4	964	1175	2600	2742	954	950	853	820	908	966	872	879	1812	1917	1970	2132
WBGene00003158	mcm-6	ZK632.1	1078	1449	2904	3071	1116	1123	743	723	683	744	777	763	1919	2049	2113	2294
WBGene00003159	mcm-7	F32D1.10	942	1111	2497	2787	695	710	590	555	660	757	558	598	1831	1996	1999	2225
WBGene00003160	mdf-1	C50F4.11	725	776	1285	1321	622	569	719	711	863	822	775	658	1344	1339	1436	1467
WBGene00003161	mdf-2	Y69A2AR.30	240	297	729	780	204	216	290	305	332	340	290	290	579	584	616	630
WBGene00003162	mdh-2	F20H11.3	5857	6505	6503	6406	7193	6999	7066	6602	7518	7422	6777	6653	1083	1158	1157	1283
WBGene00003163	mdl-1	R03E9.1	289	198	217	275	445	428	1675	1480	1535	2034	1354	1796	195	279	186	199
WBGene00003164	mdt-6	Y57E12AL.5	285	299	617	610	167	166	124	134	107	123	121	121	512	525	536	574
WBGene00003165	mec-1	T07H8.4	125	102	53	73	179	204	196	185	255	242	198	170	189	370	225	167
WBGene00003166	mec-2	F14D12.4	70	59	29	27	66	68	34	31	28	33	55	63	63	137	93	74
WBGene00003167	mec-3	F01D4.6	10	7	14	11	17	9	10	8	5	3	30	30	40	54	29	40
WBGene00003168	mec-4	T01C8.7	17	11	8	5	11	23	16	12	12	10	35	43	21	52	42	28
WBGene00003169	mec-5	E03G2.3	362	340	357	337	519	499	879	824	950	904	722	713	252	242	257	245
WBGene00003170	mec-6	W02D3.3	23	21	22	20	33	32	17	17	19	16	12	16	55	76	63	50
WBGene00003171	mec-7	ZK154.3	218	218	117	120	350	332	647	618	904	894	568	574	276	530	385	308
WBGene00003172	mec-8	F46A9.6	224	160	136	125	340	339	414	341	454	328	352	273	379	482	375	383
WBGene00003173	mec-9	C50H2.3	54	46	35	28	55	56	15	19	17	17	45	37	65	157	108	69
WBGene00003174	mec-10	F16F9.5	24	23	13	16	44	34	26	26	31	28	47	51	42	57	41	37
WBGene00003175	mec-12	C44B11.3	502	495	304	299	668	707	842	791	985	1001	752	782	390	572	437	356
WBGene00003177	mec-15	T01E8.4	464	547	958	994	257	233	226	209	219	216	218	215	809	787	883	898
WBGene00003178	mec-17	F57H12.7	334	259	155	130	264	264	392	414	531	508	372	379	259	371	299	238
WBGene00003179	mec-18	C52B9.9	55	39	28	26	60	60	55	58	62	62	52	48	70	164	117	73
WBGene00003182	mef-2	W10D5.1	196	191	124	135	290	238	325	279	315	228	293	304	227	274	204	200
WBGene00003183	mei-1	T01G9.5	425	531	1247	1380	284	265	227	228	218	234	258	225	1052	1096	1145	1219
WBGene00003184	mei-2	F57B10.12	412	543	1326	1337	110	104	125	128	148	196	112	134	656	695	736	790
WBGene00003185	mek-1	K08A8.1	360	414	856	926	360	379	331	304	281	271	483	568	894	890	911	975
WBGene00003186	mek-2	Y54E10BL.6	534	559	664	646	524	549	727	650	699	744	714	704	855	823	823	850
WBGene00003196	mel-11	C06C3.1	1149	1221	1327	1427	837	856	656	619	639	646	758	725	1951	2006	2104	2195
WBGene00003209	mel-26	ZK858.4	717	861	2085	2185	285	277	275	268	275	265	328	410	1200	1310	1361	1443
WBGene00003210	mel-28	C38D4.3	1706	1863	2232	2494	1437	1421	1188	1161	1350	1373	1303	1369	3294	3313	3462	3594
WBGene00003214	mel-32	C05D11.11	6350	4435	7152	7014	10762	10055	8958	8516	5776	4818	8458	7843	1265	1293	1391	1511
WBGene00003218	mep-1	M04B2.1	1344	1371	1903	1919	1016	1026	907	858	993	799	1061	983	1983	2057	2096	2225
WBGene00003219	mes-1	F54F7.5	20	44	185	206	10	11	5	4	5	14	2	4	1017	867	949	965
WBGene00003220	mes-2	R06A4.7	467	477	731	765	336	329	305	341	333	341	355	394	1134	1056	1161	1170
WBGene00003221	mes-3	F54C1.3	630	591	712	719	485	494	485	452	464	476	482	454	1401	1416	1528	1525
WBGene00003222	mes-4	Y2H9A.1	537	569	847	951	397	423	375	352	393	397	405	412	1622	1613	1711	1774
WBGene00003224	mes-6	C09G4.5	278	290	562	596	264	256	320	293	341	294	338	362	763	770	830	838
WBGene00003225	mev-1	T07C4.7	1281	1285	1093	1106	1550	1494	1949	1820	1769	1851	1718	1676	459	482	491	506
WBGene00003228	mex-1	W03C9.7	692	893	2575	2805	81	86	98	105	129	202	124	116	1362	1430	1465	1614
WBGene00003229	mex-3	F53G12.5	1158	1515	4377	4646	314	304	260	242	286	412	283	263	1374	1515	1528	1679
WBGene00003230	mex-5	W02A2.7	1681	2222	5731	5980	397	396	360	350	377	536	372	383	1620	1799	1781	1992
WBGene00003231	mex-6	AH6.5	729	990	2817	3016	101	103	109	105	138	218	113	118	1423	1569	1597	1744
WBGene00003232	mgl-1	ZC506.4	21	14	13	16	27	23	6	6	4	6	13	15	36	64	43	28
WBGene00003233	mgl-2	F45H11.4	76	79	68	62	224	200	184	174	221	220	189	181	189	216	187	129
WBGene00003234	mif-1	Y56A3A.3	182	145	192	185	218	190	216	219	223	226	193	196	170	165	193	176
WBGene00003235	mif-2	C52E4.2	433	408	540	488	514	482	823	790	851	859	688	671	234	198	214	229
WBGene00003236	mif-3	F13G3.9	111	115	241	257	107	103	116	110	91	90	106	102	225	225	258	241
WBGene00003238	mig-1	Y34D9B.1	123	119	116	130	214	212	122	124	93	83	118	99	230	243	204	218
WBGene00003239	mig-2	C35C5.4	200	213	230	225	253	244	239	246	227	198	281	295	391	371	388	362
WBGene00003241	mig-5	T05C12.6	399	466	1104	1141	280	277	286	307	335	317	319	239	1332	1361	1423	1507
WBGene00003242	mig-6	C37C3.6	10452	9646	3823	3860	12213	11574	17347	15440	21940	19738	18040	17009	1994	2145	1847	2074
WBGene00003243	mig-10	F10E9.6	436	349	210	222	667	666	733	695	704	646	599	600	491	661	518	498
WBGene00003245	mig-13	F43C9.4	102	99	62	65	80	86	73	62	69	78	60	58	103	120	113	84
WBGene00003246	mig-14	R06B9.6	183	190	410	427	133	143	151	153	162	203	135	127	893	862	850	906
WBGene00003247	mig-15	ZC504.4	466	405	412	447	1042	1011	799	754	949	849	955	827	888	976	826	809
WBGene00003248	mig-17	F57B7.4	114	62	49	48	138	133	184	185	205	197	165	163	133	133	120	117
WBGene00003249	mig-18	F11F1.6	90	69	66	52	131	132	222	232	324	310	216	216	105	86	86	76
WBGene00003252	mig-21	F01F1.13	10	11	8	9	5	5	23	22	29	40	19	26	32	25	28	20
WBGene00003253	mig-22	PAR2.4	847	987	1418	1424	665	662	663	595	774	628	801	690	1644	1618	1703	1789
WBGene00003254	mig-23	R07E4.4	276	228	211	208	409	413	176	161	119	119	150	141	493	427	447	437
WBGene00003258	cogc-1	Y54E10A.2	470	469	610	654	558	550	634	615	710	714	588	616	1132	1054	1159	1156
WBGene00003367	mix-1	M106.1	1033	1049	1555	1657	896	912	763	774	809	816	926	871	2261	2152	2256	2291
WBGene00003368	mkk-4	F42G10.2	94	111	108	103	94	85	60	58	46	50	86	79	274	270	229	241
WBGene00003369	mlc-1	C36E6.3	9546	9705	5221	5012	10837	10373	18301	16674	24182	23108	17844	16433	777	809	808	821
WBGene00003370	mlc-2	C36E6.5	7150	7567	5977	5669	8525	8284	13014	12339	14882	15053	11803	11284	488	532	533	579
WBGene00003371	mlc-3	F09F7.2	12159	12081	7589	7478	14635	14251	24537	23292	30716	30484	23384	21867	645	702	705	727
WBGene00003372	mlc-4	C56G7.1	2105	2118	1692	1627	1268	1242	1689	1698	1690	1716	1548	1624	479	513	529	565
WBGene00003373	mlh-1	T28A8.7	341	359	583	589	182	192	118	137	124	130	128	135	986	984	1117	1108
WBGene00003374	mlk-1	K11D12.10	321	328	202	190	363	334	253	230	260	243	253	224	503	525	411	399
WBGene00003375	mlp-1	T04C9.4	1745	1812	995	978	818	782	1179	1173	1294	1231	1047	1025	265	251	255	253
WBGene00003376	mls-1	H14A12.4	12	12	8	4	18	15	9	7	10	14	14	10	22	16	21	16
WBGene00003378	mml-1	T20B12.6	226	230	272	287	386	343	763	637	722	558	838	986	847	763	746	777
WBGene00003380	mnm-2	C10A4.8	17	20	8	10	22	22	18	22	22	18	23	25	30	25	19	17
WBGene00003384	moc-1	T06H11.4	110	117	186	192	178	185	219	215	234	234	214	194	379	311	343	338
WBGene00003385	moc-2	W01A11.6	84	74	69	80	136	121	181	177	182	195	156	180	149	135	136	130
WBGene00003386	mod-1	K06C4.6	23	22	23	24	27	25	10	9	8	8	22	26	54	59	43	31
WBGene00003387	mod-5	Y54E10BR.7	16	20	15	14	35	27	54	48	49	52	74	56	50	67	53	50
WBGene00003388	moe-3	F32A11.6	396	97	54	51	577	616	878	785	436	403	477	413	123	153	110	106
WBGene00003389	mog-1	K03H1.2	1380	1419	1873	2000	1189	1125	1094	1075	1183	1115	1342	1457	2185	2220	2276	2370
WBGene00003390	mog-2	H20J04.8	607	631	862	875	496	476	659	634	685	698	626	634	561	561	588	623
WBGene00003391	mog-3	F52C9.7	756	822	1240	1317	675	648	574	573	585	575	710	626	830	845	887	922
WBGene00003392	mog-4	C04H5.6	732	786	990	1046	798	766	919	854	943	914	924	945	1496	1420	1458	1493
WBGene00003393	mog-5	EEED8.5	1233	1322	1743	1887	1052	1015	974	1013	1123	1068	1155	1062	2155	2140	2239	2269
WBGene00003394	mom-1	T07H6.2	13	11	58	48	21	19	8	12	10	12	7	12	251	181	265	223
WBGene00003395	mom-2	F38E1.7	279	338	1048	1139	100	104	126	129	129	169	121	118	996	1032	1087	1157
WBGene00003396	mom-4	F52F12.3	288	306	586	569	186	180	128	131	144	146	153	146	1035	1065	1098	1100
WBGene00003397	mom-5	T23D8.1	924	1020	1856	1943	689	631	623	581	609	640	625	630	1670	1732	1795	1896
WBGene00003400	dapk-1	K12C11.4	1270	934	321	323	901	926	495	471	419	404	520	488	724	708	605	605
WBGene00003401	mpk-1	F43C1.2	860	906	1422	1476	557	538	524	496	481	478	520	557	1296	1363	1381	1464
WBGene00003402	mpk-2	C04G6.1	187	180	82	84	217	215	166	152	127	110	134	124	169	220	145	128
WBGene00003404	mpz-1	C52A11.4	627	538	152	180	461	457	546	504	684	578	446	460	339	578	400	370
WBGene00003405	mre-11	ZC302.1	561	634	1133	1218	390	385	421	402	444	462	428	447	1409	1421	1568	1584
WBGene00003406	mrg-1	Y37D8A.9	799	912	1483	1518	536	542	594	613	601	664	602	615	898	937	967	1038
WBGene00003407	mrp-1	F57C12.5	1085	1143	775	769	1450	1343	859	800	914	842	897	831	1279	1234	1145	1131
WBGene00003408	mrp-2	F57C12.4	228	249	213	224	444	436	187	174	215	174	289	377	516	480	390	429
WBGene00003409	mrp-3	E03G2.2	734	500	338	337	506	452	331	293	336	323	309	263	606	466	476	459
WBGene00003410	mrp-4	F21G4.2	512	799	2530	2738	726	636	401	350	478	557	444	426	3393	3378	3441	3775
WBGene00003411	mrp-5	F14F4.3	1346	1184	1467	1516	1695	1907	914	821	918	922	940	987	2014	1755	1852	1836
WBGene00003412	mrp-6	F20B6.3	226	200	159	171	201	192	113	125	107	106	147	129	458	347	337	357
WBGene00003413	mrp-7	Y43F8C.12	1130	1226	1385	1588	815	793	795	716	849	834	785	815	2494	2589	2628	2817
WBGene00003414	mrp-8	Y75B8A.26	135	113	137	139	115	98	106	83	119	127	104	90	436	363	356	291
WBGene00003415	mars-1	F58B3.5	2921	3128	3433	3442	2700	2621	2968	2803	3189	3042	3166	3025	2019	2045	2095	2263
WBGene00003417	mrt-2	Y41C4A.14	138	146	264	257	133	133	112	118	107	103	93	112	355	328	356	359
WBGene00003418	msh-2	H26D21.2	813	901	1620	1589	577	593	459	456	395	425	444	465	1570	1582	1689	1714
WBGene00003420	msh-4	T02G5.6	11	17	23	21	14	10	10	13	8	8	7	13	70	63	60	63
WBGene00003421	msh-5	F09E8.3	430	460	558	586	304	286	318	334	378	377	375	396	1446	1373	1483	1472
WBGene00003422	msh-6	Y47G6A.11	1366	1479	1927	2094	1070	1027	871	865	863	864	922	929	2321	2380	2500	2620
WBGene00003423	msi-1	R10E9.1	539	707	505	487	601	596	379	308	434	398	396	388	810	721	689	688
WBGene00003424	msp-3	F26G1.7	761	838	429	380	22	28	20	43	17	38	21	22	15	1	10	3
WBGene00003426	msp-19	F36H12.7	338	433	203	210	9	8	6	14	3	9	8	7	10	1	6	5
WBGene00003429	msp-31	R05F9.13	1527	1662	899	748	52	66	53	99	39	74	45	68	23	5	14	12
WBGene00003431	msp-33	R05F9.8	1140	1232	760	657	24	30	41	66	36	56	40	45	19	2	8	8
WBGene00003432	msp-36	C04G2.4	1149	1311	738	676	38	54	34	77	36	65	36	43	32	4	17	16
WBGene00003434	msp-38	K08F4.8	440	507	329	293	9	14	6	11	8	20	8	9	9	2	8	5
WBGene00003435	msp-40	C33F10.9	1497	1635	894	770	76	80	77	151	55	80	66	81	19	2	14	5
WBGene00003438	msp-45	F58A6.8	750	850	418	408	18	19	20	36	15	30	12	21	21	2	11	8
WBGene00003442	msp-49	C34F11.6	678	769	444	418	20	20	31	48	30	43	35	33	16	2	9	7
WBGene00003443	msp-50	C34F11.4	1319	1402	766	724	32	36	44	81	64	90	51	55	25	3	13	9
WBGene00003448	msp-55	C09B9.6	346	429	258	255	6	8	6	12	5	16	9	6	16	1	10	3
WBGene00003449	msp-56	K07F5.3	363	370	162	162	16	15	18	33	19	26	22	18	8	0	7	2
WBGene00003450	msp-57	R13H9.2	597	696	377	342	16	15	22	31	14	40	20	21	19	3	15	7
WBGene00003452	msp-59	ZK354.11	806	980	506	465	21	23	18	37	12	26	16	13	18	2	12	7
WBGene00003457	msp-64	ZK1248.6	1163	1271	591	552	48	46	36	56	45	44	31	43	16	4	11	8
WBGene00003463	msp-76	ZK1251.6	1046	1185	690	628	24	23	25	49	22	37	15	27	33	5	20	12
WBGene00003464	msp-77	F32B6.6	648	773	453	407	18	34	20	38	23	26	21	24	14	2	3	2
WBGene00003465	msp-78	T13F2.11	481	539	315	289	10	13	9	24	10	25	10	11	15	3	11	4
WBGene00003467	msp-81	K07F5.1	1100	1209	527	489	40	54	39	83	31	50	50	54	21	3	13	10
WBGene00003469	msp-142	K05F1.2	538	611	251	219	29	47	30	48	19	22	21	28	15	3	6	6
WBGene00003470	msp-152	ZK546.6	1029	1077	682	597	19	29	25	51	20	48	26	20	15	1	9	5
WBGene00003471	mtd-1	ZK337.5	24	31	19	21	40	45	50	43	69	56	57	59	57	66	60	40
WBGene00003472	mtk-1	B0414.7	598	670	889	963	648	611	657	685	753	766	695	719	1926	1921	2071	2067
WBGene00003473	mtl-1	K11G9.6	16	22	67	77	39	47	39	39	49	50	44	58	15	68	57	54
WBGene00003474	mtl-2	T08G5.10	2968	3383	2776	2788	2903	2567	1958	1969	1099	1162	1480	1593	180	187	201	215
WBGene00003475	mtm-1	Y110A7A.5	426	489	470	496	344	364	275	281	263	269	311	347	756	746	811	787
WBGene00003476	mtm-3	T24A11.1	1825	1905	2427	2668	913	913	1539	1361	1490	1502	1878	1916	2689	2845	2932	3111
WBGene00003477	mtm-5	H28G03.6	288	292	283	299	324	324	183	171	193	178	214	187	1105	897	936	913
WBGene00003478	mtm-6	F53A2.8	409	459	744	755	301	294	292	263	305	344	311	337	1174	1155	1265	1313
WBGene00003479	mtm-9	Y39H10A.3	281	304	655	665	263	287	234	232	188	234	210	202	846	868	945	945
WBGene00003480	klf-3	F54H5.4	174	166	75	69	108	124	155	137	154	110	212	285	203	205	147	162
WBGene00003482	mua-3	K08E5.3	2013	2905	986	1054	10974	10259	12157	10911	15502	11946	15750	11764	1653	2052	1228	1311
WBGene00003485	mua-6	W10G6.3	1247	1360	1374	1333	3862	3472	3799	3462	1914	1640	3908	3329	948	996	893	934
WBGene00003495	mup-2	T22E5.5	10151	9965	5033	5030	10905	10419	18845	17722	23460	21605	17415	16136	832	889	827	823
WBGene00003497	mup-4	K07D8.1	5007	3678	2255	2412	615	1141	829	757	321	370	326	518	2743	2744	2418	2573
WBGene00003499	mut-2	K04F10.6	254	275	589	614	130	133	129	136	130	150	125	130	800	817	877	902
WBGene00003504	mut-7	ZK1098.8	747	729	1037	1065	625	655	567	554	596	564	570	635	1567	1560	1672	1695
WBGene00003507	mut-14	C14C11.6	337	343	515	511	240	244	215	250	210	227	187	219	597	567	612	588
WBGene00003508	mut-16	B0379.3	735	765	782	862	507	543	563	559	618	620	598	608	1893	1843	1927	2001
WBGene00003509	mxl-1	T19B10.11	93	115	230	223	92	79	87	88	101	97	86	74	264	279	298	306
WBGene00003510	mxl-2	F40G9.11	164	206	297	294	131	141	139	132	117	123	118	114	311	301	328	339
WBGene00003511	mxl-3	F46G10.6	437	383	329	389	594	506	688	581	453	488	467	559	315	51	260	269
WBGene00003514	myo-2	T18D3.4	4457	5041	1499	1528	3802	3528	6747	5741	12561	11600	7385	6688	950	1185	892	942
WBGene00003515	myo-3	K12F2.1	6159	5100	2363	2391	7577	7146	11517	10800	16441	14199	13270	12304	1185	2080	1418	1548
WBGene00003516	nab-1	C43E11.6	215	140	102	93	325	315	358	348	380	360	316	309	348	547	353	347
WBGene00003517	nac-1	F31F6.6	231	405	246	215	192	164	148	133	172	148	195	160	346	239	286	256
WBGene00003518	nac-2	R107.1	159	91	83	79	188	205	223	211	208	207	180	208	245	191	188	170
WBGene00003519	nac-3	K08E5.2	426	558	254	270	280	250	199	176	185	180	258	251	411	233	317	287
WBGene00003522	nas-3	K06A4.1	1	1	9	16	3	8	26	22	42	42	35	38	90	121	38	80
WBGene00003523	nas-4	C05D11.6	110	145	8	14	528	544	623	588	606	563	494	515	35	72	26	26
WBGene00003524	nas-5	T23H4.3	48	52	21	21	16	22	12	15	10	16	10	12	52	44	44	31
WBGene00003525	nas-6	4R79.1	64	11	0	1	68	77	55	47	50	42	58	70	4	21	7	3
WBGene00003526	nas-7	C07D10.4	618	320	50	50	57	83	85	87	42	60	35	53	96	110	82	68
WBGene00003527	nas-8	C34D4.9	369	119	9	9	22	52	34	28	26	32	22	33	18	31	13	18
WBGene00003528	nas-9	C37H5.9	84	242	134	158	59	51	40	37	38	60	44	39	195	179	146	147
WBGene00003530	nas-11	K11G12.1	360	421	606	582	760	712	663	646	641	649	699	665	749	731	706	697
WBGene00003531	nas-12	C24F3.3	84	28	3	2	6	12	4	2	3	3	6	5	13	26	16	14
WBGene00003532	nas-13	F39D8.4	43	12	2	2	8	23	26	29	19	25	10	21	7	17	6	4
WBGene00003533	nas-14	F09E8.6	63	10	11	9	136	177	238	212	206	204	145	191	36	88	30	46
WBGene00003534	nas-15	T04G9.2	134	13	0	2	655	752	1112	919	1155	1063	877	1025	7	62	10	10
WBGene00003541	nas-22	T11F9.6	236	139	20	20	6	5	4	12	9	12	3	3	58	34	22	23
WBGene00003542	nas-23	R10H1.5	281	58	1	2	49	79	48	53	39	42	20	39	4	17	4	2
WBGene00003544	nas-25	F46C5.3	34	29	9	6	13	13	5	8	6	6	6	3	18	29	20	12
WBGene00003545	nas-27	T23F4.4	492	253	1	2	4	13	7	12	8	8	5	8	10	13	3	7
WBGene00003547	nas-29	F58A6.4	35	9	4	3	50	54	31	27	15	20	20	19	16	36	15	9
WBGene00003548	nas-30	Y95B8A.1	852	373	3	2	9	48	16	16	11	16	9	19	5	33	10	13
WBGene00003549	nas-31	F58B4.1	58	59	36	36	58	54	29	24	32	32	55	47	74	104	64	53
WBGene00003550	nas-32	T02B11.7	15	24	26	25	39	45	36	27	51	43	36	31	72	72	52	51
WBGene00003551	nas-33	K04E7.3	21	22	14	17	29	27	13	11	9	6	8	13	32	33	33	13
WBGene00003552	nas-36	C26C6.3	819	287	13	17	218	297	120	116	56	59	96	89	47	71	44	31
WBGene00003553	nas-37	C17G1.6	89	223	445	395	3011	3045	2268	2114	2427	2138	2358	2184	480	402	376	340
WBGene00003554	nas-38	F57C12.1	551	267	10	12	98	142	195	175	145	152	106	162	13	50	23	14
WBGene00003555	nas-39	F38E9.2	100	77	71	70	55	68	48	52	60	70	59	55	186	142	158	135
WBGene00003558	nca-2	C27F2.2	79	60	27	40	52	46	27	34	38	40	33	25	141	193	163	132
WBGene00003559	ncl-1	ZK112.2	450	520	317	338	607	513	973	723	1223	1097	1173	1149	2150	1912	1890	2130
WBGene00003561	ncr-1	F02E8.6	411	241	119	130	247	284	181	147	149	164	282	424	467	470	410	352
WBGene00003562	ncr-2	F09G8.4	351	239	57	42	67	82	89	118	77	81	94	99	70	56	67	43
WBGene00003563	ncs-1	C44C1.3	13	15	8	10	9	13	4	3	4	2	6	5	24	35	25	19
WBGene00003564	ncs-2	F10G8.5	2329	2103	1156	1183	2507	2478	1653	1494	1606	1500	1667	1616	702	754	701	728
WBGene00003565	ncs-3	K03E6.3	88	95	61	59	78	84	89	96	98	106	98	113	62	74	81	68
WBGene00003566	ncx-1	Y113G7A.4	1081	1586	975	911	1842	1687	2174	1915	2477	2238	2333	2092	645	691	623	517
WBGene00003567	ncx-2	C10G8.5	1109	1435	680	657	1747	1504	1979	1675	3209	3048	2081	1959	610	890	625	622
WBGene00003568	ncx-3	ZC168.1	127	124	129	131	205	199	161	162	183	162	162	162	467	555	465	403
WBGene00003569	ncx-4	F35C12.2	51	48	31	42	53	55	21	22	21	18	30	32	73	139	92	68
WBGene00003571	ncx-6	C07A9.4	64	99	83	91	43	62	23	20	15	15	18	20	221	234	111	128
WBGene00003572	ncx-7	C07A9.11	288	263	231	220	337	311	103	88	88	95	83	80	477	328	415	332
WBGene00003573	ncx-8	C13D9.7	23	48	30	25	119	107	16	12	12	9	13	18	77	77	77	53
WBGene00003575	ncx-10	Y97E10B.7	12	24	3	5	1	1	6	6	10	10	11	11	16	10	10	10
WBGene00003576	ndc-80	W01B6.9	587	673	1238	1290	424	446	323	360	335	362	340	378	1174	1222	1325	1329
WBGene00003577	ndg-4	F56F3.2	1190	1202	766	722	486	456	238	225	186	204	187	167	872	749	791	781
WBGene00003578	ndx-1	T26E3.2	110	98	59	55	239	207	265	268	314	290	221	187	80	120	79	64
WBGene00003579	ndx-2	W02G9.1	193	157	61	65	146	142	123	111	85	86	98	104	80	61	59	47
WBGene00003580	ndx-3	Y38A8.1	217	194	158	163	247	211	201	230	165	177	176	158	224	178	218	204
WBGene00003581	ndx-4	Y37H9A.6	219	209	280	272	244	214	306	325	323	343	246	287	189	183	211	203
WBGene00003582	dcap-2	F52G2.1	363	390	570	599	307	299	364	328	369	360	355	319	1162	1178	1292	1322
WBGene00003583	ndx-6	EEED8.8	126	119	137	162	140	140	118	95	80	80	115	103	313	239	287	274
WBGene00003584	ndx-7	C43E11.7	212	221	293	278	246	253	236	243	197	212	200	181	381	359	382	390
WBGene00003585	ndx-8	Y87G2A.14	39	34	26	27	42	40	50	50	53	50	48	40	102	64	77	70
WBGene00003586	ndx-9	F13H10.2	312	345	515	529	481	471	521	512	314	325	356	368	629	561	642	623
WBGene00003587	ned-8	F45H11.2	466	464	636	664	465	461	529	528	514	493	489	473	271	281	288	308
WBGene00003588	nex-1	ZC155.1	2756	2877	1763	1814	2670	2625	3406	3055	3573	2668	5599	5477	753	787	841	880
WBGene00003589	nex-2	T07C4.9	693	760	474	478	640	626	1044	964	1052	1020	2061	2766	466	449	422	420
WBGene00003590	nex-3	C28A5.3	660	806	404	376	146	159	135	157	137	141	120	145	262	254	227	224
WBGene00003591	nex-4	C37H5.1	19	11	11	13	32	26	22	19	25	24	49	62	15	82	39	29
WBGene00003592	nfi-1	ZK1290.4	495	556	802	842	402	381	336	322	357	344	326	314	1410	1379	1442	1445
WBGene00003593	nfm-1	F42A10.2	324	285	187	190	302	278	321	306	384	340	373	403	439	412	394	370
WBGene00003594	nft-1	Y56A3A.13	402	392	404	372	426	427	677	653	845	850	643	609	554	536	581	563
WBGene00003596	ngp-1	T19A6.2	2152	2141	1792	1753	1708	1679	2378	2497	3012	2872	2631	2678	1295	1343	1310	1369
WBGene00003597	nhl-1	F54G8.4	425	344	188	196	541	532	481	437	496	497	779	824	253	237	194	175
WBGene00003598	nhl-2	F26F4.7	845	899	973	1052	691	654	1238	948	1582	1408	1898	2082	2315	2355	2454	2583
WBGene00003599	nhl-3	W04H10.3	111	93	127	145	108	111	128	116	125	118	105	147	332	302	281	269
WBGene00003600	nhr-1	R09G11.2	360	393	338	342	393	361	331	309	337	300	484	537	556	597	554	568
WBGene00003601	nhr-2	C32F10.6	6	6	110	113	3	3	16	16	19	16	20	19	457	381	407	408
WBGene00003602	nhr-3	H01A20.1	265	184	79	89	147	137	317	233	298	240	1984	2823	266	326	250	233
WBGene00003603	nhr-4	F32B6.1	120	107	166	151	112	122	65	69	61	58	61	51	423	401	411	398
WBGene00003604	nhr-5	Y73F8A.21	137	181	103	90	65	68	74	67	79	92	88	90	228	187	176	158
WBGene00003605	nhr-6	C48D5.1	58	57	12	10	22	25	62	51	84	54	82	87	56	109	81	78
WBGene00003606	nhr-7	F54D1.4	49	73	40	36	29	35	20	16	20	24	33	30	82	122	79	69
WBGene00003607	nhr-8	F33D4.1	334	252	109	121	298	297	232	237	195	203	186	173	482	415	437	382
WBGene00003609	nhr-10	B0280.8	261	271	245	252	219	207	84	87	52	52	97	87	504	436	479	448
WBGene00003610	nhr-11	ZC410.1	32	33	23	25	28	33	27	35	24	22	19	17	69	51	62	39
WBGene00003611	nhr-12	R04B5.4	98	69	161	173	60	52	80	78	86	86	69	60	417	365	413	369
WBGene00003612	nhr-13	Y5H2B.2	100	66	161	138	78	71	31	36	18	23	22	18	349	268	297	304
WBGene00003613	nhr-14	T01B10.4	201	193	143	148	201	206	116	81	145	138	294	293	352	419	310	293
WBGene00003614	nhr-15	F33E11.1	19	19	17	15	41	37	22	20	23	26	22	20	52	79	63	47
WBGene00003615	nhr-16	T12C9.6	41	33	29	28	38	30	18	18	16	12	15	11	56	41	44	29
WBGene00003616	nhr-17	C02B4.2	63	63	129	129	66	78	175	164	144	160	140	186	322	277	281	266
WBGene00003617	nhr-18	F44C8.3	50	53	31	32	51	55	56	56	60	68	58	62	84	81	78	66
WBGene00003618	nhr-19	E02H1.7	81	105	49	66	121	99	145	113	162	168	146	203	127	180	128	112
WBGene00003619	nhr-20	F43C1.4	90	90	202	207	100	109	57	55	46	47	64	60	503	463	490	477
WBGene00003620	nhr-21	F21D12.1	76	68	66	65	112	115	115	107	97	112	112	121	221	214	216	200
WBGene00003621	nhr-22	K06A1.4	139	103	144	136	107	115	58	75	52	58	36	34	448	350	431	425
WBGene00003622	nhr-23	C01H6.5	512	521	466	464	586	496	529	497	585	486	936	756	1129	1208	1198	1242
WBGene00003623	nhr-25	F11C1.6	42	14	16	18	28	53	77	63	84	80	52	78	92	311	134	121
WBGene00003624	nhr-28	C11G6.4	169	159	116	121	143	125	78	76	97	76	112	90	270	217	242	225
WBGene00003625	nhr-31	C26B2.3	901	930	500	480	785	737	857	802	746	745	783	710	796	839	666	709
WBGene00003626	nhr-32	K08H2.8	147	123	98	98	166	166	136	144	138	118	146	175	215	241	205	180
WBGene00003627	nhr-34	F58G6.5	268	277	213	188	159	166	157	149	140	136	206	238	476	470	448	415
WBGene00003628	nhr-35	C07A12.3	204	173	158	163	255	257	204	203	164	144	195	182	312	340	317	287
WBGene00003630	nhr-40	T03G6.2	208	201	177	152	242	251	123	130	86	82	141	159	420	456	428	396
WBGene00003632	nhr-42	C33G8.6	106	94	91	91	91	80	96	107	92	103	58	64	112	107	98	88
WBGene00003633	nhr-43	C29E6.5	47	34	14	28	81	97	607	447	806	504	554	467	78	89	56	60
WBGene00003634	nhr-44	T19A5.4	45	36	31	31	56	50	35	35	31	32	40	29	56	88	61	49
WBGene00003635	nhr-45	F16H11.5	370	337	144	145	224	237	194	175	142	146	276	333	250	325	232	219
WBGene00003636	nhr-46	C45E5.6	302	311	353	335	388	365	236	220	209	206	196	152	828	863	814	828
WBGene00003637	nhr-47	C24G6.4	106	127	159	174	122	131	68	68	57	58	112	78	462	409	344	377
WBGene00003638	nhr-48	ZK662.3	232	232	181	177	217	215	270	245	341	325	267	300	608	552	517	547
WBGene00003639	nhr-49	K10C3.6	799	774	1008	1002	764	759	864	812	853	810	937	830	1101	1115	1155	1164
WBGene00003640	nhr-50	C06C6.5	77	61	25	21	65	70	41	45	46	45	97	125	74	107	66	54
WBGene00003643	nhr-53	K06B4.11	35	41	15	16	8	7	21	20	14	14	12	15	58	19	34	38
WBGene00003644	nhr-54	F36D3.2	16	15	9	9	15	17	6	6	5	10	12	11	18	26	20	13
WBGene00003645	nhr-55	T01G6.7	125	136	81	79	83	84	79	83	96	94	83	65	158	147	148	105
WBGene00003646	nhr-56	F44C8.6	34	29	34	36	39	41	16	18	16	14	45	70	66	73	69	58
WBGene00003647	nhr-57	T05B4.2	27	26	50	44	54	58	52	56	41	49	37	42	73	85	65	58
WBGene00003648	nhr-58	R11G11.2	55	62	20	22	89	87	37	37	50	42	31	26	29	35	31	28
WBGene00003649	nhr-59	T27B7.1	22	19	15	15	27	35	25	24	19	22	14	16	37	31	34	23
WBGene00003651	nhr-61	W01D2.2	86	91	107	98	68	85	147	140	168	142	125	123	238	225	226	203
WBGene00003652	nhr-62	Y67A6A.2	56	51	52	41	49	40	37	37	29	36	31	38	181	157	135	136
WBGene00003653	nhr-63	C06C6.4	45	28	4	7	22	34	16	10	9	14	45	98	22	57	26	22
WBGene00003654	nhr-64	C45E1.1	87	93	82	77	85	105	109	114	71	68	89	73	188	155	154	151
WBGene00003655	nhr-65	Y17D7A.3	87	98	80	78	78	79	62	67	65	66	38	35	145	100	100	100
WBGene00003656	nhr-66	T09A12.4	581	512	842	885	387	376	290	254	248	258	281	241	1407	1402	1511	1493
WBGene00003657	nhr-67	C08F8.8	12	9	6	5	19	17	18	21	16	12	31	20	17	43	19	17
WBGene00003658	nhr-68	H12C20.3	1045	841	739	702	1143	1223	513	542	347	334	484	397	565	371	590	580
WBGene00003659	nhr-69	T23H4.2	290	297	205	192	269	254	219	225	196	182	193	238	325	307	324	300
WBGene00003660	nhr-70	Y51A2D.17	182	161	111	118	152	153	154	170	135	148	135	129	238	195	200	202
WBGene00003661	nhr-71	K11E4.5	147	129	304	327	126	128	79	85	51	57	60	81	726	632	716	681
WBGene00003664	nhr-74	C27C7.3	2	4	57	44	79	91	133	128	134	132	86	67	57	81	36	43
WBGene00003668	nhr-78	F36A4.14	40	24	58	56	36	29	19	16	22	18	23	12	184	143	166	139
WBGene00003669	nhr-79	T26H2.9	63	70	86	90	84	75	82	81	98	80	45	47	132	134	127	115
WBGene00003670	nhr-80	H10E21.3	146	128	154	125	251	222	230	197	236	241	202	192	190	164	178	150
WBGene00003673	nhr-83	F48G7.3	17	18	14	12	24	24	5	4	6	5	4	5	29	19	26	18
WBGene00003674	nhr-84	T06C12.7	159	137	76	68	43	45	65	63	51	49	103	114	174	138	158	135
WBGene00003675	nhr-85	W05B5.3	44	52	10	9	19	18	132	103	157	260	172	297	59	126	72	71
WBGene00003676	nhr-86	Y40B10A.8	382	343	395	390	314	290	275	277	234	251	213	228	511	475	498	489
WBGene00003677	nhr-87	Y41D4B.7	68	65	45	44	52	66	70	63	96	119	61	68	85	79	68	56
WBGene00003678	nhr-88	K08A2.5	324	388	189	217	298	275	353	322	446	439	273	268	414	400	388	359
WBGene00003680	nhr-90	ZK488.2	66	66	52	61	77	72	49	45	32	44	40	48	120	81	98	76
WBGene00003681	nhr-91	Y15E3A.1	63	55	20	23	308	251	225	195	288	192	350	191	67	208	78	77
WBGene00003682	nhr-92	Y41D4B.8	35	41	30	28	46	35	29	39	24	32	39	36	48	38	43	38
WBGene00003683	nhr-93	T24A6.9	18	12	15	9	5	9	9	6	5	8	11	4	18	16	12	12
WBGene00003684	nhr-94	C12D5.8	92	65	22	21	39	38	31	35	29	27	36	31	55	63	48	40
WBGene00003685	nhr-95	Y39B6A.17	100	88	100	95	135	128	120	107	128	125	99	105	176	159	169	216
WBGene00003686	nhr-96	F44C8.11	50	55	38	41	63	63	35	31	30	28	34	32	79	68	63	57
WBGene00003687	nhr-97	H27C11.1	945	1028	810	845	1622	1564	816	771	382	357	956	784	860	998	895	859
WBGene00003688	nhr-98	M02H5.6	36	31	31	29	34	37	47	47	53	47	31	32	56	76	53	48
WBGene00003689	nhr-99	M02H5.1	67	105	21	20	38	47	21	17	20	22	23	28	42	44	20	24
WBGene00003690	nhr-100	C28D4.1	217	182	191	195	245	251	116	129	74	80	111	90	350	338	377	332
WBGene00003691	nhr-101	H12C20.6	233	253	174	176	208	197	207	177	164	170	183	188	364	130	383	330
WBGene00003692	nhr-102	T06C12.6	63	53	45	50	26	40	46	49	44	43	36	31	102	88	97	76
WBGene00003693	nhr-103	F44C8.4	39	52	26	24	49	46	43	38	44	40	35	49	64	69	55	43
WBGene00003694	nhr-104	R11E3.5	103	98	80	70	122	135	108	100	82	90	93	97	146	120	131	113
WBGene00003695	nhr-105	C06G3.1	131	176	117	127	113	125	437	407	489	466	320	400	190	231	190	210
WBGene00003696	nhr-106	T01G6.4	48	51	33	34	55	47	33	42	34	28	32	34	89	65	64	53
WBGene00003697	nhr-107	C33G8.11	86	112	51	57	74	67	50	58	45	50	36	41	110	113	107	86
WBGene00003698	nhr-108	F35E8.12	21	23	20	17	19	17	12	11	6	10	3	5	46	43	39	29
WBGene00003699	nhr-109	T12C9.5	102	106	72	73	103	108	78	87	70	73	69	74	123	104	104	84
WBGene00003700	nhr-110	Y46H3D.5	61	56	57	52	47	51	44	46	52	40	41	39	100	72	81	69
WBGene00003702	nhr-112	Y70C5C.6	47	53	14	14	28	36	46	38	51	50	58	86	42	63	43	42
WBGene00003704	nhr-114	Y45G5AM.1	1350	696	2195	1984	2128	2112	3529	3428	3272	3188	2238	1755	922	447	872	878
WBGene00003705	nhr-115	T27B7.4	71	81	19	23	29	28	13	15	11	12	17	16	70	43	58	41
WBGene00003706	nhr-116	F09C6.9	32	20	21	17	40	39	11	9	12	10	20	15	36	60	47	40
WBGene00003707	nhr-117	F16B4.12	89	110	49	58	41	43	23	19	11	17	42	55	44	69	44	42
WBGene00003709	nhr-119	K12H6.1	159	165	103	98	218	202	203	164	135	146	132	117	187	191	147	142
WBGene00003710	nhr-120	C25B8.6	117	91	88	69	83	94	54	47	28	35	74	79	87	134	90	66
WBGene00003711	nhr-121	E02H9.8	107	100	81	85	157	144	147	151	146	139	125	107	157	153	136	128
WBGene00003712	nhr-122	Y41D4B.9	88	66	83	77	98	85	75	76	68	66	63	60	177	146	152	139
WBGene00003713	nhr-123	M02H5.7	14	18	10	16	15	17	25	22	23	16	22	17	42	36	31	23
WBGene00003715	nhr-125	R02D1.1	15	15	13	17	26	24	13	16	17	18	12	13	37	41	33	25
WBGene00003716	nhr-126	F44C8.10	52	53	35	35	43	49	60	57	60	64	44	46	59	57	57	40
WBGene00003718	nhr-128	F44C8.5	23	18	23	14	30	26	15	22	16	10	24	22	58	43	46	37
WBGene00003719	nhr-129	C50B6.14	12	14	12	18	31	39	34	35	47	36	22	26	54	72	50	47
WBGene00003720	nhr-130	T01G6.8	91	82	66	66	103	97	59	64	43	44	68	59	131	85	111	92
WBGene00003721	nhr-131	T01G6.2	86	84	71	60	86	88	28	29	22	24	17	21	94	82	77	55
WBGene00003722	nhr-132	R11G11.1	45	50	28	35	51	60	48	47	33	34	26	27	70	62	53	54
WBGene00003723	nhr-133	F44C8.8	89	93	58	57	69	62	61	54	53	56	52	58	106	114	87	86
WBGene00003724	nhr-134	F44C8.2	76	64	72	54	81	81	50	54	51	48	47	56	114	99	103	94
WBGene00003725	nhr-135	VC5.5	77	75	61	62	65	50	76	70	60	62	53	51	129	119	99	96
WBGene00003726	nhr-136	C13C4.3	56	62	55	45	94	89	73	80	57	54	78	61	126	122	121	88
WBGene00003727	nhr-137	C56E10.4	135	133	69	87	88	78	53	68	55	64	54	86	142	96	137	110
WBGene00003728	nhr-138	C28D4.9	140	103	175	189	160	162	64	72	40	52	77	49	366	368	402	362
WBGene00003729	nhx-1	B0395.1	49	108	109	92	40	30	16	15	12	14	24	21	123	83	81	71
WBGene00003730	nhx-2	B0495.4	1215	1143	671	687	1297	1322	919	928	1112	1078	990	902	819	719	779	670
WBGene00003731	nhx-3	C54F6.13	197	324	161	178	131	92	197	185	140	154	203	264	241	213	183	159
WBGene00003732	nhx-4	F14B8.1	171	180	128	129	157	151	76	70	97	72	115	144	309	253	216	207
WBGene00003733	nhx-5	F57C7.2	349	266	137	152	309	344	207	216	254	228	270	320	485	440	463	438
WBGene00003735	nhx-8	Y18D10A.6	685	573	298	297	644	647	511	462	525	510	478	532	480	457	401	408
WBGene00003736	nhx-9	ZK822.3	308	197	98	81	409	419	170	159	183	151	231	152	216	255	168	166
WBGene00003738	nid-1	F54F3.1	2823	2300	1506	1504	3009	2921	2282	2210	2101	2002	2124	2095	1651	1747	1585	1629
WBGene00003739	nlp-1	C01C4.1	47	43	46	32	63	84	34	32	38	26	35	49	86	124	107	98
WBGene00003740	nlp-2	T24D8.5	11	10	3	3	23	23	30	26	33	29	30	31	19	23	27	14
WBGene00003741	nlp-3	F48C11.3	79	80	62	62	99	95	60	50	68	58	84	72	105	128	105	93
WBGene00003742	nlp-4	F59C6.6	106	103	41	39	19	21	23	26	20	18	14	18	12	5	8	10
WBGene00003743	nlp-5	F35C11.1	11	14	10	10	10	10	9	10	13	16	8	8	51	55	58	49
WBGene00003744	nlp-6	T23E7.4	136	126	81	97	123	112	132	136	142	146	136	134	155	167	167	149
WBGene00003745	nlp-7	F18E9.2	42	51	42	44	47	64	65	64	77	72	68	60	96	94	99	76
WBGene00003746	nlp-8	D2005.2	91	82	49	55	105	111	72	61	47	54	83	89	133	199	162	134
WBGene00003747	nlp-9	E03D2.2	108	90	86	74	141	134	60	50	46	54	64	74	111	117	123	95
WBGene00003748	nlp-10	F37A8.4	115	122	105	96	109	106	93	79	79	68	64	78	145	157	146	123
WBGene00003749	nlp-11	ZK1320.10	88	82	63	56	107	102	74	63	82	66	84	83	107	129	106	96
WBGene00003750	nlp-12	M01D7.5	48	49	43	36	64	63	78	63	76	62	64	70	47	69	67	66
WBGene00003751	nlp-13	E03D2.1	135	133	66	85	158	178	113	87	122	102	117	112	162	177	169	149
WBGene00003752	nlp-14	D1009.4	171	148	99	99	262	241	147	118	105	76	153	170	195	210	199	160
WBGene00003753	nlp-15	CC4.2	85	96	78	75	99	85	64	71	74	58	115	119	118	135	130	106
WBGene00003754	nlp-16	T13A10.5	144	141	112	111	255	229	96	93	93	76	116	113	162	216	134	141
WBGene00003755	nlp-17	Y45F10A.5	38	44	31	30	48	54	65	69	75	70	55	57	71	112	93	87
WBGene00003756	nlp-18	F33A8.2	84	90	62	56	126	133	131	141	141	129	110	129	97	138	95	84
WBGene00003758	nlp-20	F45E4.8	158	132	125	119	171	166	206	199	193	178	166	165	150	145	164	170
WBGene00003759	nlp-21	Y47D3B.2	111	109	86	93	149	154	125	128	154	132	131	148	139	152	133	136
WBGene00003762	nlp-24	F35B12.7	2094	3112	971	943	1242	1266	1669	1614	1418	1701	1418	1498	244	228	215	227
WBGene00003763	nlp-25	Y43F8C.1	304	284	2	2	9	10	104	125	126	188	65	84	19	28	28	12
WBGene00003764	nlp-26	Y43F8C.2	163	500	350	333	136	99	64	66	56	58	65	59	113	97	105	101
WBGene00003765	nlp-27	B0213.2	303	819	804	757	86	78	99	101	121	180	133	115	173	189	177	201
WBGene00003766	nlp-28	B0213.3	52	226	96	122	11	12	200	188	379	439	244	217	136	151	130	154
WBGene00003767	nlp-29	B0213.4	163	331	57	72	95	85	182	174	194	251	207	236	85	154	99	93
WBGene00003768	nlp-30	B0213.5	192	95	8	9	205	197	261	263	178	193	271	284	9	59	16	14
WBGene00003769	nlp-31	B0213.6	100	122	58	90	347	328	396	410	388	420	533	546	58	135	74	76
WBGene00003771	nlp-33	T19C4.7	1959	1187	330	358	1286	1356	3371	3377	3406	4194	3031	3457	173	175	180	181
WBGene00003772	nlr-1	F20B10.1	86	88	58	67	107	101	31	35	32	36	56	51	255	354	227	240
WBGene00003773	nlt-1	ZK892.2	582	570	480	473	1217	1219	998	974	915	926	874	839	229	249	243	240
WBGene00003775	nmr-2	T01C3.10	17	18	9	8	14	18	14	10	11	6	8	11	14	26	14	16
WBGene00003776	nmy-1	F52B10.1	12153	11130	3658	3594	5536	5531	4991	5079	5088	4624	4635	4938	2895	2796	2906	2948
WBGene00003777	nmy-2	F20G4.3	4244	4589	6069	6707	2819	2696	3060	2937	3504	3432	3267	3127	4867	5039	5206	5592
WBGene00003778	nnt-1	C15H9.1	56	29	10	9	35	36	39	40	24	39	26	52	95	68	69	63
WBGene00003779	nob-1	Y75B8A.2	57	50	28	33	55	60	61	55	48	58	50	46	83	97	81	68
WBGene00003783	nos-1	R03D7.7	103	140	207	233	45	35	50	47	73	78	51	51	411	426	443	479
WBGene00003784	nos-2	ZK1127.1	68	118	448	541	1	1	3	1	7	22	0	3	503	528	540	569
[truncated: 10,621 more rows]
